# Supplementary material for: Synthesis, structure and N–N bonding character of 1,1-disubstituted indazolium hexafluorophosphate
Source: Royal Society of Chemistry journal article supplement (doi:10.1039/c8cc00183a), 2018-01-01
Supplement: c8cc00183a1.pdf [file c8cc00183a1.pdf]

## Electronic Supplementary Information

### Synthesis, Structure and N-N Bonding Character of 1,1-Disubstituted Indazolium

#### Hexafluorophosphate

Yingtang Ning,<sup>[a]</sup> Masatoshi Kawahata,<sup>[b]</sup> Kentaro Yamaguchi,<sup>[b]</sup> Yuko Otani,<sup>[a]</sup> Tomohiko Ohwada\*<sup>[a]</sup>

<sup>a</sup>*Graduate School of Pharmaceutical Sciences, The University of Tokyo, 7-3-1 Hongo, Bunkyo-ku,  
Tokyo, 113-0033, Japan.*

<sup>b</sup>*Department of Pharmaceutical Sciences at Kagawa Campus, Tokushima Bunri University, 1314-1  
Shido, Sanuki, Kagawa 769-2193, Japan.*

\*E-Mail: ohwada@mol.f.u-tokyo.ac.jp

## Table of Contents

|                                             |     |
|---------------------------------------------|-----|
| Contents                                    |     |
| Synthesis                                   | S3  |
| Single crystal X-ray diffraction experiment | S15 |
| Computational study                         | S19 |
| Figure S1                                   |     |
| NMR Spectral of Synthesized Compounds       | S20 |
| Reference                                   |     |

## Experimental Procedures

### General Methods:

All reactions were carried out under argon atmosphere in oven-dried glassware. All commercially available compounds and solvents were used as received unless otherwise mentioned.

Open column chromatography was carried out using Kanto chemical silica gel (silica gel 60 N (100-210  $\mu\text{m}$ )). Melting points were determined with a Yanaco micro melting point apparatus without correction.  $^1\text{H}$ - (400 MHz) and  $^{13}\text{C}$ - (100 MHz) NMR spectra were recorded on a Bruker Avance 400. Chemical shifts were calibrated with tetramethylsilane and solvent as an internal standard or with the solvent peak, and are shown in ppm ( $\delta$ ) values, and coupling constants are shown in hertz (Hz). The following abbreviations are used: s = singlet, d = doublet, t = triplet, q = quartet, dd = double doublet, dt = double triplet, dq = double quartet, h = hextet, m = multiplet, brs = broad singlet, br = broad signal. Electron spray ionization time-of-flight mass spectra (ESI-TOF MS) were recorded on a Bruker micrOTOF-05 to give high-resolution mass spectra (HRMS). The combustion analyses were carried out in the microanalytical laboratory of this department.

### Synthesis of *peri*-amino oxime 7

#### synthesis of 7a, 7d, 7e, 7g and 7l

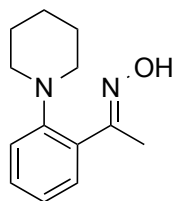

**7a.** A solution of 1-(2-(piperidin-1-yl)phenyl)ethan-1-one<sup>[S1]</sup> (1500.0 mg, 7.40 mmol), pyridine (1.5 mL), hydroxylamine hydrochloride (1000.0 mg, 2.0 equiv.) in 15 mL of ethanol was heated to reflux for 1hr. The reaction mixture was evaporated, diluted with dichloromethane and washed with water. The solvent was evaporated and the residue was purified by column chromatography (hexane: ethyl acetate= 6: 1) to afford **7a** (white solid, 1000.2 mg, 62%).

Mp.: 151.0-152.0 °C.  $^1\text{H}$  NMR ( $\text{CDCl}_3$ ):  $\delta$  8.36 (1H, brs), 7.36-7.28 (2H, m), 7.08-7.01 (2H, m), 2.95 (4H, t,  $J=5.2$  Hz), 2.33 (3H, s), 1.73-1.67 (4H, m), 1.59-1.55 (2H, m).  $^{13}\text{C}$  NMR ( $\text{CDCl}_3$ ):  $\delta$  159.9, 152.2, 131.9, 130.0, 129.7, 122.2, 118.9, 53.4, 26.5, 24.3, 14.3. HRMS (ESI-TOF,  $[\text{M}+\text{H}]^+$ ): Calcd. for  $\text{C}_{13}\text{H}_{19}\text{N}_2\text{O}^+$ : 219.1492. Found: 219.1505. Anal. Calcd. for Chemical Formula:  $\text{C}_{13}\text{H}_{18}\text{N}_2\text{O}$   
Elemental Analysis: C, 71.53; H, 8.31; N, 12.83. Found: C, 71.20; H, 8.40; N, 12.77.

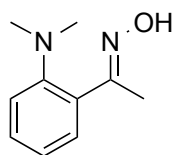

**7d.** A solution of 1-(2-(dimethylamino)phenyl)ethan-1-one<sup>[S2]</sup> (852.3 mg, 5.22 mmol), pyridine (1.7 mL), hydroxylamine hydrochloride (725.0 mg, 2.0 equiv.) in 10 mL of ethanol was heated to reflux for 1hr. The reaction mixture was evaporated, diluted with dichloromethane and washed with water. The solvent was evaporated and the residue was purified by column chromatography (hexane: ethyl acetate= 6: 1) to afford **7d** (white solid, 409.7 mg, 44%).

Mp.: 75.5-77.0 °C.  $^1\text{H}$  NMR ( $\text{CDCl}_3$ ):  $\delta$  7.35-7.28 (2H, m), 7.03 (1H, d,  $J=7.6$  Hz), 6.97 (1H, dt,  $J=1.2, 7.6$  Hz), 2.77 (6H, s), 2.27 (3H, s).  $^{13}\text{C}$  NMR ( $\text{CDCl}_3$ ):  $\delta$  159.6, 151.5, 130.3, 130.1, 129.6, 121.3, 117.6, 43.6, 13.9. HRMS (ESI-TOF,  $[\text{M}+\text{H}]^+$ ): Calcd. for  $\text{C}_{10}\text{H}_{15}\text{N}_2\text{O}^+$ : 179.1179. Found: 179.1186. Anal. Calcd. for  $\text{C}_{10}\text{H}_{14}\text{N}_2\text{O}$ : C, 67.39; H, 7.92; N, 15.72. Found: C, 67.25; H, 7.96; N, 15.58.

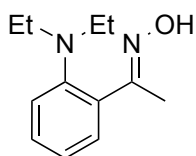

**7e.** A solution of 1-(2-(diethylamino)phenyl)ethan-1-one<sup>[S2]</sup> (485.6 mg, 2.54 mmol), pyridine (0.5 mL), hydroxylamine hydrochloride (350.0 mg, 2.0 equiv.) in 5 mL of ethanol was heated to reflux for 1hr. The reaction mixture was evaporated, diluted with dichloromethane and washed with water. The solvent was evaporated and the residue was purified by column chromatography (hexane: ethyl acetate= 4: 1) to afford **7e** (colorless oil, 287.6 mg, 55%).

<sup>1</sup>H NMR (CDCl<sub>3</sub>): δ 7.38-7.30 (2H, m), 7.15-7.10 (2H, m), 3.10 (4H, q, *J*= 7.2), 2.31 (3H, s), 1.09 (6H, t, *J*= 7.2 Hz). <sup>13</sup>C NMR (CDCl<sub>3</sub>): δ 159.6, 151.5, 130.3, 130.1, 129.6, 121.3, 117.6, 43.6, 21.1, 13.9. HRMS (ESI-TOF, [M+H]<sup>+</sup>): Calcd. for C<sub>12</sub>H<sub>19</sub>N<sub>2</sub>O<sup>+</sup>: 207.1492. Found 207.1499.

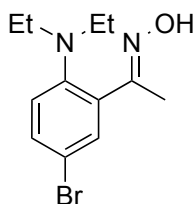

**7g.** A solution of 1-(5-bromo-2-(diethylamino)phenyl)ethan-1-one<sup>[S3]</sup> (683.4 mg, 2.53 mmol), pyridine (1.0 mL), hydroxylamine hydrochloride (350.0 mg, 2.0 equiv.) in 10 mL of ethanol was heated to reflux for 1hr. The reaction mixture was evaporated, diluted with dichloromethane and washed with water. The solvent was evaporated and the residue was purified by column chromatography (hexane: ethyl acetate= 6: 1) to afford **7g** (off-white solid, 430.7 mg, 60%).

Mp.: 85.0-85.5 °C. <sup>1</sup>H NMR (CDCl<sub>3</sub>): δ 9.23 (1H, brs), 7.43-7.39 (2H, m), 6.94 (1H, d, *J*= 8.4 Hz), 3.08 (4H, q, *J*= 6.8), 2.24 (3H, s), 1.01 (6H, t, *J*= 6.8 Hz). <sup>13</sup>C NMR (CDCl<sub>3</sub>): δ 157.9, 147.4, 131.5, 129.4, 129.3, 122.9, 121.0, 46.8, 21.1, 11.8. HRMS (ESI-TOF, [M+H]<sup>+</sup>): Calcd. for C<sub>12</sub>H<sub>18</sub>BrN<sub>2</sub>O<sup>+</sup>: 285.0597. Found: 285.0602. Anal. Calcd. for C<sub>12</sub>H<sub>17</sub>BrN<sub>2</sub>O: C, 50.54; H, 6.01; N, 9.82. Found: C, 50.30; H, 6.03; N, 9.69.

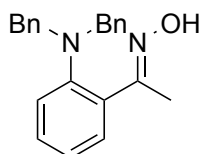

**7i.** A solution of 1-(2-(dibenzylamino)phenyl)ethan-1-one<sup>[S4]</sup> (2166.1 mg, 6.87 mmol), pyridine (3.0 mL), hydroxylamine hydrochloride (1000.0 mg, 2.1 equiv.) in 40 mL of ethanol was heated to reflux for 1hr. The reaction mixture was evaporated, diluted with dichloromethane and washed with water. The solvent was evaporated and the residue was purified by column chromatography (hexane: ethyl acetate= 6: 1) to afford **7i** (white solid, 1730.2 mg, 76%).

Mp.: 173.5-174.0 °C. <sup>1</sup>H NMR (CDCl<sub>3</sub>): δ 8.96 (1H, brs), 7.34-7.22 (8H, m), 7.15-7.13 (4H, m), 7.04 (1H, dt, *J*= 0.8, 7.6 Hz), 6.91 (1H, d, *J*= 8.0 Hz), 4.13 (4H, s), 2.41 (3H, s). <sup>13</sup>C NMR (CDCl<sub>3</sub>): δ 159.6, 149.3, 137.4, 132.4, 130.3, 129.3, 129.2, 128.2, 127.1, 122.6, 121.7, 55.9, 15.3. HRMS (ESI-TOF, [M+H]<sup>+</sup>): Calcd. for C<sub>22</sub>H<sub>23</sub>N<sub>2</sub>O<sup>+</sup>: 331.1805. Found: 331.1828. Anal. Calcd. for C<sub>22</sub>H<sub>22</sub>N<sub>2</sub>O: C, 79.97; H, 6.71; N, 8.48. Found C, 79.81; H, 6.87; N, 8.44.

**synthesis of 7b, 7c, 7i, 7j.**

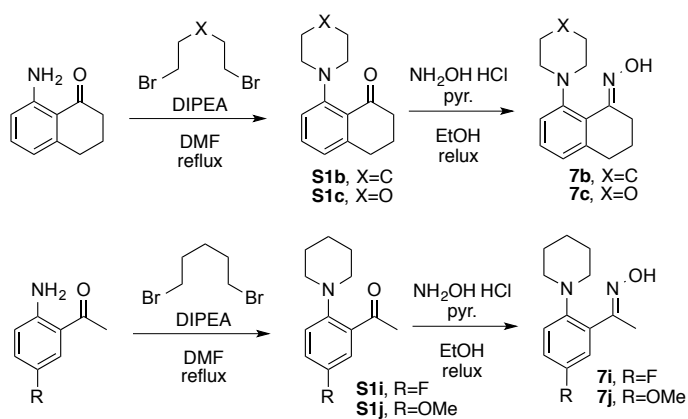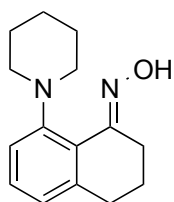

**7b.** A solution of 8-amino-3,4-dihydronaphthalen-1(2*H*)-one (400.0 mg, 2.48 mmol), 1,5-dibromopentane (1150.0 mg, 2.0 equiv.) and DIPEA (2.5 ml) in 10 mL of DMF was heated to reflux for 2 hr. The reaction was quenched by slow addition of water and the whole was extracted with Et<sub>2</sub>O. The combined organic layers were concentrated and purified by column chromatography (hexane: ethyl acetate= 9: 1) to afford an inseparable mixture of **S1b** and reactant (**S1b** : reactant = 2: 1, 391.3 mg, yellow oil).

A solution of crude **S1b** (391.3 mg, calcd. 1.17 mmol), pyridine (1.0 mL), hydroxylamine hydrochloride (190.0 mg, 2.3 equiv.) in 5 mL of ethanol was heated to reflux for 1hr. The reaction mixture was evaporated, diluted with dichloromethane and washed with water. The solvent was evaporated and the residue was purified by column chromatography (hexane: ethyl acetate= 4: 1) to afford **7b** (white solid, 196.5 mg, 33% in 2 steps).

Mp.: 185.0-185.5 °C. <sup>1</sup>H NMR (CDCl<sub>3</sub>): δ 7.20-7.13 (2H, m), 7.00 (1H, d, *J*= 7.2 Hz), 2.99-2.77 (8H, m), 1.92-1.82 (8H, m). <sup>13</sup>C NMR (CDCl<sub>3</sub>): δ 151.2, 149.4, 140.4, 128.6, 126.1, 121.4, 119.5, 54.2, 30.9, 26.2, 24.6, 23.6, 20.5. HRMS (ESI-TOF, [M+H]<sup>+</sup>): Calcd. for C<sub>15</sub>H<sub>21</sub>N<sub>2</sub>O<sup>+</sup>: 245.16484. Found: 245.1639. Anal. Calcd. for C<sub>15</sub>H<sub>20</sub>N<sub>2</sub>O: C, 73.74; H, 8.25; N, 11.47. Found C, 73.46; H, 8.16; N, 11.32.

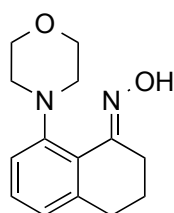

**7c.** A solution of 8-amino-3,4-dihydronaphthalen-1(2*H*)-one (1000.0 mg, 6.20 mmol), 1,5-dibromopentane (2900.0 mg, 2.0 equiv.) and DIPEA (2.7 ml) in 15 mL of DMF was heated to reflux for 2hr. The reaction was quenched by slow addition of water and the whole was extracted with Et<sub>2</sub>O. The combined organic layers were concentrated and purified by column chromatography (hexane: ethyl acetate= 4: 1) to afford **S1c** (yellow oil, 866.8 mg, 60%).

<sup>1</sup>H NMR (CDCl<sub>3</sub>): δ 7.35 (1H, t, *J*= 7.6 Hz), 6.89-6.84 (2H, m), 3.94-3.91 (4H, m), 3.05 (4H, t, *J*= 4.4 Hz), 2.94 (2H, t, *J*= 6.4 Hz), 2.62 (2H, t, *J*= 6.8 Hz), 2.08-2.01 (2H, m). <sup>13</sup>C NMR (CDCl<sub>3</sub>): δ 197.3, 153.4, 147.8, 133.7, 124.2, 122.0, 116.4, 67.2, 53.0, 41.3, 31.6, 22.6. HRMS (ESI-TOF, [M+Na]<sup>+</sup>): Calcd. for C<sub>14</sub>H<sub>17</sub>NNaO<sub>2</sub><sup>+</sup>: 254.1151. Found: 254.1164.

A solution of 8-morpholino-3,4-dihydronaphthalen-1(2*H*)-one (**S1c**, 542.9 mg, 2.34 mmol), DABCO (660.0 mg, 2.5 equiv.), hydroxylamine hydrochloride (325.0 mg, 2.0 equiv.) in 4 mL of ethanol was heated to reflux for 1hr. The reaction mixture was evaporated, diluted with dichloromethane and washed with water. The solvent was evaporated and the residue was purified by column chromatography (hexane: ethyl acetate= 4: 1) to afford **7c** (white solid, 501.2 mg, 87%).

Mp.: 188.0-189.5 °C.  $^1\text{H}$  NMR ( $\text{CDCl}_3$ ):  $\delta$  7.20 (1H, t,  $J=8.0$  Hz), 6.98 (1H, d,  $J=8.0$  Hz), 6.90 (1H, d,  $J=7.6$  Hz), 3.94-3.91 (4H, m), 3.05-3.03 (4H, m), 2.90 (2H, t,  $J=6.8$  Hz), 2.68 (2H, t,  $J=6.0$  Hz), 1.85-1.79 (2H, m).  $^{13}\text{C}$  NMR ( $\text{CDCl}_3$ ):  $\delta$  153.1, 150.9, 143.3, 129.1, 123.2, 122.8, 116.6, 66.4, 52.4, 31.1, 25.1, 20.9. HRMS (ESI-TOF,  $[\text{M}+\text{H}]^+$ ): Calcd. for  $\text{C}_{14}\text{H}_{19}\text{N}_2\text{O}_2^+$ : 247.1441. Found: 247.1440. Anal. Calcd. for  $\text{C}_{14}\text{H}_{18}\text{N}_2\text{O}_2$ : C, 68.27; H, 7.37; N, 11.37. Found: C, 68.26; H, 7.38; N, 11.30.

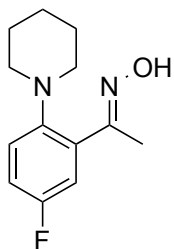

**7i.** A solution of 1-(2-amino-5-fluorophenyl)ethan-1-one (422.7 mg, 2.76 mmol), 1,5-dibromopentane (750.0 mg, 1.2 equiv.) and DIPEA (2.0 ml) in 10 mL of DMF was heated to reflux for 10hr. The reaction was quenched by slow addition of water and the whole was extracted with  $\text{Et}_2\text{O}$ . The combined organic layers were concentrated and purified by column chromatography (hexane: ethyl acetate= 4: 1) to afford **S1i** (yellow oil, 328.2 mg, 54%).  $^1\text{H}$  NMR ( $\text{CDCl}_3$ ):  $\delta$  7.15-7.05 (3H, m), 2.92 (4H, brs), 2.90 (3H, s), 1.76-1.70 (4H, m), 1.60-1.56 (2H, m).  $^{13}\text{C}$  NMR ( $\text{CDCl}_3$ ):  $\delta$  203.4, 158.2 (d,  $J=241.4$  Hz), 149.0, 137.1 (d,  $J=5.8$  Hz), 120.7 (d,  $J=7.6$  Hz), 118.2 (d,  $J=22.0$  Hz), 115.8 (d,  $J=9.5$  Hz), 115.5 (d,  $J=23.3$  Hz), 60.4, 55.0, 29.2, 26.3, 23.9. HRMS (ESI-TOF,  $[\text{M}+\text{H}]^+$ ): Calcd. for  $\text{C}_{13}\text{H}_{17}\text{FNO}^+$ : 222.1289. Found: 222.1311.

A solution of 1-(5-fluoro-2-(piperidin-1-yl)phenyl)ethan-1-one (315.6 mg, 1.43 mmol), pyridine (1.0 mL), hydroxylamine hydrochloride (200.0 mg, 2.0 equiv.) in 5 mL of ethanol was heated to reflux for 1hr. The reaction mixture was evaporated, diluted with dichloromethane and washed with water. The solvent was evaporated and the residue was purified by column chromatography (hexane: ethyl acetate= 6: 1) to afford **7i** (white solid, 250.1 mg, 72%).

Mp.: 123.0-125.5 °C.  $^1\text{H}$  NMR ( $\text{CDCl}_3$ ):  $\delta$  7.04-7.02 (3H, m), 2.88 (4H, t,  $J=5.2$  Hz), 2.32 (3H, s), 1.72-1.67 (4H, m), 1.58-1.53 (2H, m).  $^{13}\text{C}$  NMR ( $\text{CDCl}_3$ ):  $\delta$  158.7, 158.3 (d,  $J=237.4$  Hz), 148.5, 133.7 (d,  $J=7.4$  Hz), 120.4 (d,  $J=8.2$  Hz), 116.6 (d,  $J=23.1$  Hz), 115.9 (d,  $J=21.5$  Hz), 53.9, 26.4, 24.1, 14.4. HRMS (ESI-TOF,  $[\text{M}+\text{H}]^+$ ): Calcd. for  $\text{C}_{13}\text{H}_{18}\text{FN}_2\text{O}^+$ : 237.1398. Found 237.1406.

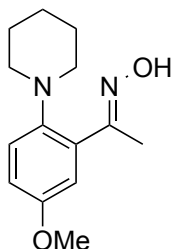

**7j.** A solution of 1-(2-amino-5-methoxyphenyl)ethan-1-one (374.8 mg, 2.27 mmol), 1,5-dibromopentane (630.0 mg, 1.2 equiv.) and DIPEA (1.5 ml) in 10 mL of DMF was heated to reflux for 6hr. The reaction was quenched by slow addition of water and the whole was extracted with  $\text{Et}_2\text{O}$ . The combined organic layers were concentrated and purified by column chromatography (hexane: ethyl acetate= 6: 1) to afford **S1j** (yellow oil, 422.7 mg, 80%).  $^1\text{H}$  NMR ( $\text{CDCl}_3$ ):  $\delta$  7.09-7.06 (1H, m), 6.99-6.96 (2H, m), 3.80 (3H, s), 2.88 (4H, t,  $J=5.6$  Hz), 2.72 (3H, s), 1.75-1.69 (4H, m), 1.58-1.53 (2H, m).  $^{13}\text{C}$  NMR ( $\text{CDCl}_3$ ):  $\delta$  204.7, 155.1, 146.6, 136.9, 120.7, 118.0, 113.0, 55.6, 51.1, 29.6, 26.4, 24.0. HRMS (ESI-TOF,  $[\text{M}+\text{H}]^+$ ): Calcd. for  $\text{C}_{14}\text{H}_{20}\text{NO}_2^+$ : 234.1489. Found 234.1492.

A solution of 1-(5-methoxy-2-(piperidin-1-yl)phenyl)ethan-1-one (414.4 mg, 1.78 mmol), pyridine (1.0 mL), hydroxylamine hydrochloride (250.0 mg, 2.0 equiv.) in 5 mL of ethanol was heated to reflux for 1hr. The reaction mixture was evaporated, diluted with dichloromethane and washed with water. The solvent was evaporated and the residue was purified by column chromatography (hexane: ethyl acetate= 6: 1) to afford **7j** (white solid, 273.5 mg, 62%).

Mp.: 114.5-116.0 °C.  $^1\text{H}$  NMR ( $\text{CDCl}_3$ ):  $\delta$  7.04-7.00 (1H, m), 6.89-6.85 (2H, m), 3.78 (3H, s), 2.84 (4H, t,  $J=5.2$  Hz), 2.31 (3H, s), 1.68-1.64 (4H, m), 1.54-1.48 (2H, m).  $^{13}\text{C}$  NMR ( $\text{CDCl}_3$ ):  $\delta$  159.6, 155.1, 146.0, 133.6, 120.5, 115.1, 114.9, 55.6, 54.0, 26.6, 24.2, 14.7. HRMS (ESI-TOF,  $[\text{M}+\text{H}]^+$ ): Calcd. for  $\text{C}_{14}\text{H}_{21}\text{N}_2\text{O}_2^+$ : 249.1598. Found 249.1606. Anal. Calcd. for  $\text{C}_{14}\text{H}_{20}\text{N}_2\text{O}_2$ : C, 67.72; H, 8.12; N, 11.28. Found: C, 67.36; H, 8.04; N, 11.17.

## Synthesis of 7f

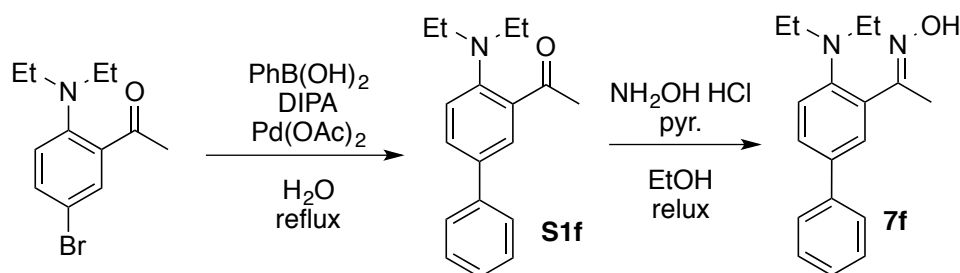

**7f.** A solution of 1-(5-bromo-2-(diethylamino)phenyl)ethan-1-one (1171.4 mg, 4.34 mmol), DIPA (1.0 mL), PhB(OH)<sub>2</sub> (800.0 mg, 1.5 equiv.) and Pd(OAc)<sub>2</sub> (50.0 mg, 5% equiv.) in 20 mL of water was heated to reflux for 1 hr. The reaction mixture was extracted with dichloromethane and dried over anhydrous sodium sulfate. The solvent was evaporated and the residue was purified by column chromatography (hexane: ethyl acetate= 9: 1) to afford **S1f** (yellow oil, 733.7 mg, 63%).

<sup>1</sup>H NMR (CDCl<sub>3</sub>): δ 7.64 (1H, dd, *J*=2.4, 8.0 Hz), 7.65-7.59 (3H, m), 7.46-7.42 (2H, m), 7.36-7.32 (1H, m), 7.16 (1H, d, *J*=8.4 Hz), 3.19 (4H, q, *J*=6.8 Hz), 2.69 (3H, s), 1.10 (6H, t, *J*=7.2 Hz). <sup>13</sup>C NMR (CDCl<sub>3</sub>): δ 204.8, 148.9, 140.1, 136.8, 134.6, 129.6, 128.8, 127.7, 127.0, 126.7, 121.5, 47.6, 29.3, 11.8. HRMS (ESI-TOF, [M+H]<sup>+</sup>): Calcd. for C<sub>18</sub>H<sub>22</sub>NO<sup>+</sup>: 268.1696. Found 268.1704.

A solution of 1-(4-(diethylamino)-[1,1'-biphenyl]-3-yl)ethan-1-one (**S1f**, 357.4 mg, 1.34 mmol), pyridine (0.5 mL), hydroxylamine hydrochloride (180.0 mg, 2.0 equiv.) in 5 mL of ethanol was heated to reflux for 1 hr. The reaction mixture was evaporated, diluted with dichloromethane and washed with water. The solvent was evaporated and the residue was purified by column chromatography (hexane: ethyl acetate= 4: 1) to afford **7f** (white solid, 214.4 mg, 57%).

Mp.: 122.5-124.0 °C. <sup>1</sup>H NMR (CDCl<sub>3</sub>): δ 7.63-7.60 (2H, m), 7.58-7.55 (2H, m), 7.43 (2H, m), 7.34-7.30 (1H, m), 7.14 (1H, d, *J*= 8.0 Hz), 3.16 (4H, q, *J*= 6.8 Hz), 2.31 (3H, s), 1.07 (6H, t, *J*= 6.8 Hz). <sup>13</sup>C NMR (CDCl<sub>3</sub>): δ 159.8, 148.2, 140.5, 135.0, 133.4, 128.7, 128.7, 127.6, 126.82, 126.81, 121.6, 46.7, 14.5, 11.9. HRMS (ESI-TOF, [M+H]<sup>+</sup>): Calcd. for C<sub>18</sub>H<sub>23</sub>N<sub>2</sub>O<sup>+</sup>: 283.1805. Found: 283.1829. Anal. Calcd. for C<sub>18</sub>H<sub>22</sub>N<sub>2</sub>O: C, 76.56; H, 7.85; N, 9.92. Found C, 76.23; H, 7.96; N, 9.80.

## Synthesis of 7h, 7k

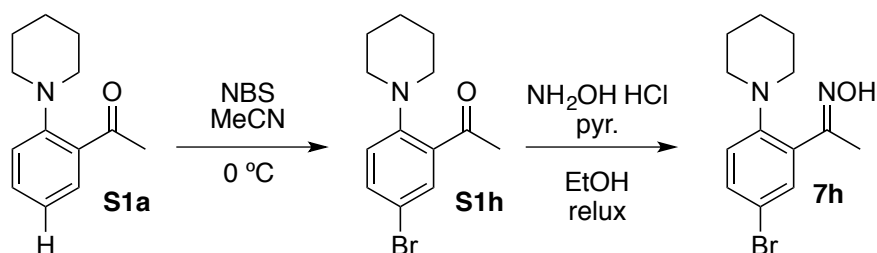

**7h.** To a solution of **S1a** (630.0 mg, 3.10 mmol) in 15 mL of MeCN was added NBS (550.0 mg, 1.0 equiv.) at 0 °C. The solution was stirred at room temperature for 2 hr and the whole was concentrated. The residue was purified with column chromatography (hexane: ethyl acetate= 20: 1) to afford **S1h** (yellow oil, 752.5 mg, 86%).

<sup>1</sup>H NMR (CDCl<sub>3</sub>): δ 7.51-7.46 (2H, m), 6.95 (1H, d, *J*=8.4 Hz), 2.93 (4H, t, *J*= 5.2 Hz), 2.66 (3H, s), 1.75-1.69 (4H, m), 1.60-1.56 (2H, m). <sup>13</sup>C NMR (CDCl<sub>3</sub>): δ 203.1, 151.5, 136.6, 134.4, 131.8, 120.5, 114.7, 54.5, 28.8, 26.1, 23.9. HRMS (ESI-TOF, [M+H]<sup>+</sup>): Calcd. for C<sub>13</sub>H<sub>17</sub>BrNO<sup>+</sup>: 282.0488. Found 282.0489.

A solution of 1-(5-bromo-2-(piperidin-1-yl)phenyl)ethan-1-one (597.4 mg, 2.12 mmol), pyridine (2.0 mL), hydroxylamine hydrochloride (300.0 mg, 2.0 equiv.) in 10 mL of ethanol was heated to reflux for 1 hr. The reaction mixture was evaporated, diluted with dichloromethane and washed with water. The solvent was evaporated and the residue was purified by column chromatography (hexane: ethyl acetate= 6: 1) to afford **7h** (white solid, 431.8 mg, 69%).

Mp.: 155.0-155.5 °C. <sup>1</sup>H NMR (CDCl<sub>3</sub>): δ 9.01 (1H, brs), 7.45 (1H, dd, *J*= 2.0, 8.4 Hz), 7.38 (1H, d, *J*= 2.0 Hz), 6.98 (1H, d, *J*= 8.4 Hz), 2.92 (4H, t, *J*= 5.2 Hz), 2.29 (3H, s), 1.75-1.70 (4H, m), 1.60-1.57 (2H, m). <sup>13</sup>C NMR (CDCl<sub>3</sub>): δ 156.7, 149.6, 132.5, 131.9, 131.8, 120.8, 115.4, 53.7, 26.2, 23.9, 20.5. HRMS (ESI-TOF, [M+Na]<sup>+</sup>): Calcd. for C<sub>13</sub>H<sub>17</sub>BrN<sub>2</sub>NaO<sup>+</sup>: 319.0417. Found: 319.0430. Anal. Calcd. for C<sub>13</sub>H<sub>17</sub>BrN<sub>2</sub>O: C, 52.54; H, 5.77; N, 9.43.

Found C, 52.30; H, 5.89; N, 9.42.

### Synthesis of 7k

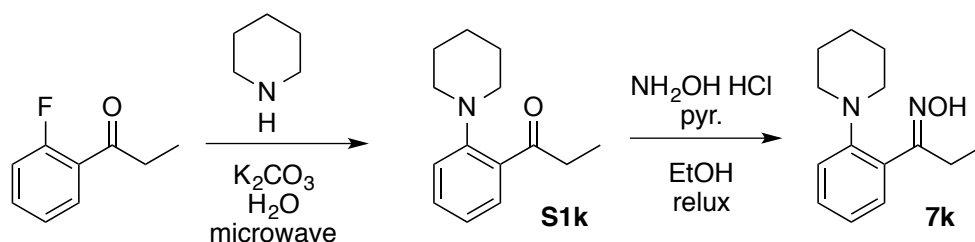

**7k**. A mixture of 1-(2-fluorophenyl)propan-1-one (1000.0 mg, 6.57 mmol),  $K_2CO_3$  (1000.0 mg, 1.1 equiv.), piperidine (3.3 mL, 5.0 equiv.) in 10 mL of water was heated to 150 °C for 1 hr with microwave irradiation. The reaction mixture was acidified to pH=1 with 2M hydrochloric acid and washed with ethyl acetate. The aqueous layer was neutralized by saturated  $NaHCO_3$  solution and the whole was extracted with ethyl acetate. The solvent was evaporated to afford **S1k** (yellow oil, 901.1 mg, 63%).

$^1H$  NMR ( $CDCl_3$ ):  $\delta$  7.38 (1H, d,  $J=7.6$  Hz), 7.31 (1H, d,  $J=7.2$  Hz), 7.08-7.02 (2H, m), 3.10 (2H, q,  $J=7.2$  Hz), 2.94 (4H, br), 1.71 (4H, br), 1.57 (2H, br), 1.18 (3H, t,  $J=7.2$  Hz).  $^{13}C$  NMR ( $CDCl_3$ ):  $\delta$  209.1, 152.1, 135.8, 131.3, 128.6, 122.2, 118.7, 54.4, 34.6, 26.3, 24.0, 8.7. HRMS (ESI-TOF,  $[M+H]^+$ ): Calcd. for  $C_{14}H_{20}NO^+$ : 218.1539. Found 218.1546

A solution of 1-(2-(piperidin-1-yl)phenyl)propan-1-one (734.4 mg, 3.39 mmol), pyridine (3.5 mL), hydroxylamine hydrochloride (470.0 mg, 2.0 equiv.) in 10 mL of ethanol was heated to reflux for 1 hr. The reaction mixture was evaporated, diluted with dichloromethane and washed with water. The solvent was evaporated and the residue was purified by column chromatography (hexane: ethyl acetate= 9: 1) to afford **7k** (white solid, 462.7 mg, 59%). Mp.: 107.5-108.5 °C.  $^1H$  NMR ( $CDCl_3$ ):  $\delta$  7.33 (1H, dt,  $J=1.2, 8.0$  Hz), 7.23 (1H, dd,  $J=1.2$  Hz), 7.07-7.01 (2H, m), 2.67-2.90 (6H, m), 1.69-1.66 (4H, m), 1.58-1.55 (2H, m), 0.97 (3H, t,  $J=7.6$  Hz).  $^{13}C$  NMR ( $CDCl_3$ ):  $\delta$  164.9, 152.1, 130.9, 130.6, 129.6, 112.4, 118.9, 53.5, 26.4, 24.3, 20.4, 10.3. HRMS (ESI-TOF,  $[M+H]^+$ ): Calcd. for  $C_{14}H_{21}N_2O^+$ : 233.1648. Found: 233.1622. Anal. Calcd. for  $C_{14}H_{20}N_2O$ : C, 72.38; H, 8.68; N, 12.06. Found C, 72.49; H, 8.74; N, 11.70.

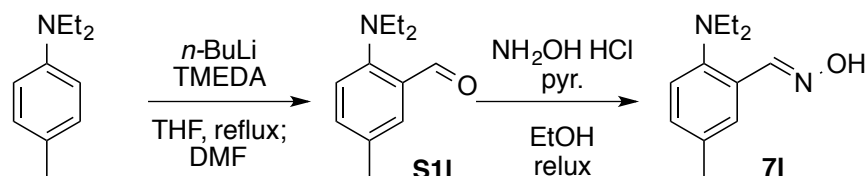

**7l**. A solution of *N,N*-diethyl-4-methylaniline (6.44 g, 39.4 mmol) and TMEDA (4.24 g, 36.4 mmol) in 50 mL of THF was cooled to 0 °C. *n*-BuLi (1.46 M solution in hexane, 24 mL, 35.0 mmol) was added dropwise, and the solution was heated to reflux for 8 hr. The solution was cooled to ambient temperature and a solution of DMF (3.1 mL, 39.4 mmol) in 20 mL of THF was added dropwise. The reaction mixture was stirred at room temperature for 12 hr. The reaction was quenched by slow addition of saturated  $NH_4Cl$  solution, and the whole was extracted with  $Et_2O$ . The solvent was evaporated and the residue was purified with distillation (82 °C/ 2 mmHg) to afford **S1l** (3.36 g, 45%, yellow oil)

$^1H$  NMR ( $CDCl_3$ ):  $\delta$  10.4 (1H, s), 7.64 (1H, d,  $J=2.0$  Hz), 7.35 (1H, dd,  $J=2.4, 8.4$  Hz), 7.12 (1H, d,  $J=8.4$  Hz), 3.15 (4H, q,  $J=7.2$  Hz), 2.35 (3H, s), 1.05 (6H, t,  $J=7.2$  Hz).  $^{13}C$  NMR ( $CDCl_3$ ):  $\delta$  192.6, 152.4, 135.3, 132.4, 131.2, 128.6, 122.1, 49.3, 20.6, 12.4. HRMS (ESI-TOF,  $[M+H]^+$ ): Calcd. for  $C_{12}H_{18}NO^+$ : 192.1383. Found: 192.1389

A solution of 2-(diethylamino)-5-methylbenzaldehyde (**S1l**, 519.1 mg, 2.71 mmol), pyridine (2 mL), hydroxylamine hydrochloride (380.0 mg, 2.0 equiv.) in 20 mL of ethanol was heated to reflux for 1 hr. The reaction mixture was evaporated, diluted with dichloromethane and washed with water. The solvent was evaporated and the residue was purified by column chromatography (hexane: ethyl acetate= 4: 1) to afford **7l** (colorless oil, 430.9 mg, 77%).  $^1H$  NMR ( $CDCl_3$ ):  $\delta$  8.60 (1H, s), 7.58 (1H, s), 7.18 (1H, dd,  $J=2.0, 8.4$  Hz), 7.06 (1H, d,  $J=8.0$  Hz), 3.01 (4H, q,  $J=7.2$  Hz), 2.38 (3H, s), 0.98 (6H, t,  $J=7.2$  Hz).  $^{13}C$  NMR ( $CDCl_3$ ):  $\delta$  149.2, 148.0, 133.2, 131.1, 128.6, 126.8, 122.5, 48.6, 20.8, 12.3. HRMS (ESI-TOF,  $[M+H]^+$ ): Calcd. for  $C_{12}H_{19}N_2O^+$ : 207.1497. Found: 207.1497.



### Synthesis of 1,1-disubstituted indazolium hexafluorophosphates **3**

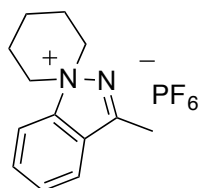

**3a.** To a solution of **7a** (218.3 mg, 1.0 mmol), pyridine (320.0  $\mu$ L, 4.0 equiv.) and KPF<sub>6</sub> (370.0 mg, 2.0 equiv.) in CH<sub>2</sub>Cl<sub>2</sub> (5.0 mL) was added TsCl (210.0 mg, 1.1 equiv.) at 0 °C. The whole was stirred at 0 °C for 1 hr. The reaction was quenched with water and the mixture was extracted with CH<sub>2</sub>Cl<sub>2</sub>. The solvent was evaporated and the residue was purified with recrystallization (ethanol) to afford **3a** (314.4 mg, 91%, colorless solid).

Mp.: 208.0-210.0 °C. <sup>1</sup>H NMR (CD<sub>2</sub>Cl<sub>2</sub>):  $\delta$  8.05 (1H, d,  $J$ =8.0 Hz), 7.92-7.88 (1H, m), 7.84-7.83 (2H, m), 4.14 (2H, dt,  $J$ =2.8, 12.4 Hz), 3.14-.3.10 (2H, m), 2.67 (3H, s), 2.50-2.37 (2H, m), 2.10-2.05 (2H, m), 2.00-1.91 (2H, m). <sup>13</sup>C NMR (CD<sub>2</sub>Cl<sub>2</sub>):  $\delta$  173.8, 155.4, 136.1, 134.9, 131.2, 126.7, 119.5, 66.6, 24.4, 22.0, 15.2. HRMS (ESI-TOF, [M-PF<sub>6</sub>]<sup>+</sup>): Calcd. for C<sub>13</sub>H<sub>17</sub>N<sub>2</sub><sup>+</sup>, 201.1386. Found: 201.1385. Anal. Calcd. for C<sub>13</sub>H<sub>17</sub>F<sub>6</sub>N<sub>2</sub>P: C, 45.09; H, 4.95; N, 8.09. Found C, 44.87; H, 5.01; N, 8.08.

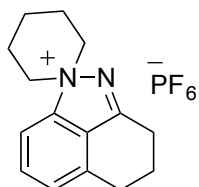

**3b.** To a solution of **7b** (122.5 mg, 0.5 mmol), NEt<sub>3</sub> (280.0  $\mu$ L, 4.0 equiv.) and KPF<sub>6</sub> (185.0 mg, 2.0 equiv.) in CH<sub>2</sub>Cl<sub>2</sub> (2.5 mL) was added TsCl (105.0 mg, 1.1 equiv.) at 0 °C. The whole was stirred at 0 °C for 1 hr. The reaction was quenched with water and the mixture was extracted with CH<sub>2</sub>Cl<sub>2</sub>. The solvent was evaporated and the residue was purified with recrystallization (ethanol) to afford **3b** (171.8 mg, 92%, colorless solid).

Mp.: 213.5-215.0 °C. <sup>1</sup>H NMR (CDCl<sub>3</sub>):  $\delta$  7.96 (1H, d,  $J$ =8.0 Hz), 7.74 (1H, t,  $J$ =8.0 Hz), 7.55 (1H, d,  $J$ =7.6 Hz) 4.28-4.21 (2H, m), 3.16-3.13 (2H, br), 3.07 (2H, t,  $J$ =6.4 Hz), 2.98 (2H, t,  $J$ =6.0 Hz), 2.42-2.39 (2H, m), 2.25 (2H, quint,  $J$ =6.0 Hz), 2.09-2.02 (4H, br). <sup>13</sup>C NMR (CDCl<sub>3</sub>):  $\delta$  172.4, 152.1, 140.2, 134.8, 130.8, 126.8, 115.7, 63.7, 25.2, 24.1, 23.0, 22.7, 19.8. HRMS (ESI-TOF, [M-PF<sub>6</sub>]<sup>+</sup>): Calcd. for: C<sub>15</sub>H<sub>19</sub>N<sub>2</sub><sup>+</sup>, 227.1543. Found: 227.1534. Anal. Calcd. for C<sub>15</sub>H<sub>19</sub>F<sub>6</sub>N<sub>2</sub>P: C, 48.39; H, 5.14; N, 7.52. Found C, 48.12; H, 5.05; N, 7.50.

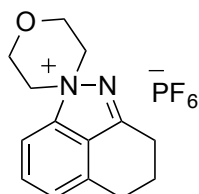

**3c.** To a solution of **7b** (123.0 mg, 0.5 mmol), NEt<sub>3</sub> (280.0  $\mu$ L, 4.0 equiv.) and KPF<sub>6</sub> (185.0 mg, 2.0 equiv.) in CH<sub>2</sub>Cl<sub>2</sub> (2.5 mL) was added TsCl (105.0 mg, 1.1 equiv.) at 0 °C. The whole was stirred at 0 °C for 1 hr. The reaction was quenched with water and the mixture was extracted with CH<sub>2</sub>Cl<sub>2</sub>. The solvent was evaporated and the residue was purified with recrystallization (ethanol) to afford **3c** (166.3 mg, 89%, colorless solid).

Mp.: 208.0-208.5 °C. <sup>1</sup>H NMR (CD<sub>3</sub>OD):  $\delta$  8.01 (1H, d,  $J$ =8.0 Hz), 7.89 (1H, t,  $J$ =8.0 Hz), 7.73 (1H, d,  $J$ =7.6 Hz) 4.53-4.43 (4H, m), 4.28-4.24 (2H, m), 3.43-3.41 (2H, m), 3.15 (2H, t,  $J$ =6.4), 3.04 (2H, t,  $J$ =6.0 Hz), 2.28 (2H, quint,  $J$ =6.4 Hz). <sup>13</sup>C NMR (CD<sub>3</sub>OD):  $\delta$  173.5, 150.5, 141.5, 134.9, 131.5, 127.3, 114.9, 63.1, 61.9, 25.2, 24.1, 22.9. Calcd. for C<sub>14</sub>H<sub>17</sub>N<sub>2</sub>O<sup>+</sup>, 229.1335. Found: 229.1329. Anal. Calcd. for C<sub>14</sub>H<sub>17</sub>F<sub>6</sub>N<sub>2</sub>OP: C, 44.93; H, 4.58; N, 7.49. Found C, 44.76; H, 4.63; N, 7.42.

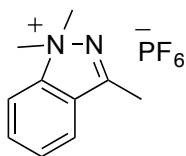

**3d.** To a solution of **7d** (65.5 mg, 0.37 mmol), pyridine (120.0  $\mu$ L, 2.0 equiv.) and  $\text{KPF}_6$  (135.0 mg, 2.0 equiv.) in  $\text{CH}_2\text{Cl}_2$  (2.0 mL) was added TsCl (80.0 mg, 1.1 equiv.) at 0  $^\circ\text{C}$ . The whole was stirred at 0  $^\circ\text{C}$  for 1 hr. The reaction was quenched with water and the mixture was extracted with  $\text{CH}_2\text{Cl}_2$ . The solvent was evaporated and the residue was purified with recrystallization (ethanol) to afford **3d** (96.6 mg, 86%, colorless solid).

Mp.: 174.5-175.0  $^\circ\text{C}$ .  $^1\text{H}$  NMR ( $\text{CD}_2\text{Cl}_2$ ):  $\delta$  8.15 (1H, d,  $J=8.0$  Hz), 8.01-7.97 (1H, m), 7.94-7.89 (2H, m), 3.72 (6H, s), 2.72 (3H, s).  $^{13}\text{C}$  NMR ( $\text{CD}_2\text{Cl}_2$ ):  $\delta$  171.8, 152.8, 134.4, 133.0, 128.8, 124.9, 117.2, 54.0, 12.9. HRMS (ESI-TOF,  $[\text{M-PF}_6]^\oplus$ ): Calcd. for  $\text{C}_{10}\text{H}_{13}\text{N}_2^+$ : 161.1073. Found: 161.1080. Anal. Calcd. for  $\text{C}_{10}\text{H}_{13}\text{F}_6\text{N}_2\text{P}$ : C, 39.23; H, 4.28; N, 9.15. Found C, 39.02; H, 4.29; N, 8.97.

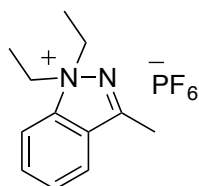

**3e.** To a solution of **7e** (90.7 mg, 0.44 mmol), DABCO (200.0 mg, 4.0 equiv.) and  $\text{KPF}_6$  (160.0 mg, 2.0 equiv.) in  $\text{CH}_2\text{Cl}_2$  (2.0 mL) was added TsCl (90.0 mg, 1.1 equiv.) at 0  $^\circ\text{C}$ . The whole was stirred at 0  $^\circ\text{C}$  for 1 hr. The reaction was quenched with water and the mixture was extracted with  $\text{CH}_2\text{Cl}_2$ . The solvent was evaporated and the residue was purified with recrystallization (ethanol) to afford **3e** (122.9 mg, 84%, colorless solid).

Mp.: 205.5-207.0  $^\circ\text{C}$ .  $^1\text{H}$  NMR ( $\text{CDCl}_3$ ):  $\delta$  8.18 (1H, d,  $J=8.4$  Hz), 7.43 (1H, dt,  $J=1.2, 8.0$  Hz), 7.85-7.78 (2H, m) 4.32-4.19 (4H, m), 2.71 (3H, s), 0.87 (6H, t,  $J=7.2$  Hz).  $^{13}\text{C}$  NMR ( $\text{CDCl}_3$ ):  $\delta$  172.9, 148.6, 134.8, 132.8, 131.3, 124.0, 118.7, 61.3, 13.0, 7.7. HRMS (ESI-TOF,  $[\text{M-PF}_6]^\oplus$ ): Calcd. for:  $\text{C}_{12}\text{H}_{17}\text{N}_2^+$ : 189.1386. Found: 189.1405. Anal. Calcd. for  $\text{C}_{12}\text{H}_{17}\text{F}_6\text{N}_2\text{P}$ : C, 43.12; H, 5.13; N, 8.38. Found: C, 43.32; H, 5.07; N, 8.37.

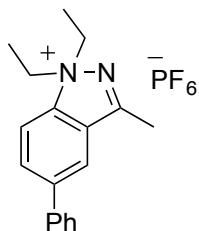

**3f.** To a solution of **7f** (60.0 mg, 0.21 mmol), pyridine (70  $\mu$ L, 4.0 equiv.) and  $\text{KPF}_6$  (80.0 mg, 2.0 equiv.) in  $\text{CH}_2\text{Cl}_2$  (1.5 mL) was added TsCl (50.0 mg, 1.2 equiv.) at 0  $^\circ\text{C}$ . The whole was stirred at 0  $^\circ\text{C}$  for 1 hr. The reaction was quenched with water and the mixture was extracted with  $\text{CH}_2\text{Cl}_2$ . The solvent was evaporated and the residue was purified with recrystallization (ethanol) to afford **3f** (66.1 mg, 76%, colorless solid).

Mp.: 141.5-142.5  $^\circ\text{C}$ .  $^1\text{H}$  NMR ( $\text{CD}_2\text{Cl}_2$ ):  $\delta$  8.18 (1H, dd,  $J=1.6, 8.4$  Hz), 8.07 (1H, d,  $J=8.4$  Hz), 8.02 (1H, d,  $J=1.6$  Hz), 7.73-7.70 (2H, m), 7.61-7.52 (3H, m), 4.35-4.18 (4H, m), 2.80 (3H, s), 0.98 (6H,  $J=7.2$  Hz).  $^{13}\text{C}$  NMR ( $\text{CD}_2\text{Cl}_2$ ):  $\delta$  173.8, 147.4, 147.0, 138.2, 133.7, 132.9, 129.8, 129.6, 127.9, 123.0, 118.6, 61.9, 13.4, 8.0. HRMS (ESI-TOF,  $[\text{M-PF}_6]^\oplus$ ): Calcd. for  $\text{C}_{18}\text{H}_{21}\text{N}_2^+$ : 265.16993. Found: 265.1707.

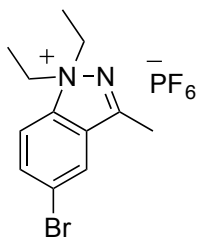

**3g.** To a solution of **7g** (121.0 mg, 0.42 mmol), pyridine (140  $\mu$ L, 4.0 equiv.) and  $\text{KPF}_6$  (155.0 mg, 2.0 equiv.) in  $\text{CH}_2\text{Cl}_2$  (2.0 mL) was added TsCl (90.0 mg, 1.1 equiv.) at 0  $^\circ\text{C}$ . The whole was stirred at 0  $^\circ\text{C}$  for 1 hr. The

reaction was quenched with water and the mixture was extracted with  $\text{CH}_2\text{Cl}_2$ . The solvent was evaporated and the residue was purified with recrystallization (ethanol) to afford **3g** (135.6 mg, 77%, colorless solid).

Mp.: 175.0-178.5 °C.  $^1\text{H}$  NMR ( $\text{CD}_2\text{Cl}_2$ ):  $\delta$  8.08 (1H, dd,  $J=1.6, 8.0$  Hz), 7.07-7.92 (2H, m), 4.27-4.14 (4H, m), 2.69 (3H, s), 0.91 (6H, t,  $J=6.8$  Hz).  $^{13}\text{C}$  NMR ( $\text{CD}_2\text{Cl}_2$ ):  $\delta$  172.5, 147.3, 137.4, 133.4, 127.5, 126.9, 119.5, 61.6, 13.0, 7.6. HRMS (ESI-TOF,  $[\text{M}-\text{PF}_6]^\oplus$ ): Calcd. for  $\text{C}_{12}\text{H}_{16}\text{BrN}_2^+$ , 267.0491. Found: 267.0491. Anal. Calcd. for  $\text{C}_{12}\text{H}_{16}\text{BrF}_6\text{N}_2\text{P}$ : C, 34.89; H, 3.90; N, 6.78. Found C, 34.71; H, 3.90; N, 6.79.

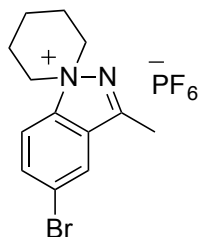

**3h**. To a solution of **7h** (150.5 mg, 0.51 mmol), pyridine (160.0  $\mu\text{L}$ , 4.0 equiv.) and  $\text{KPF}_6$  (190.0 mg, 2.0 equiv.) in  $\text{CH}_2\text{Cl}_2$  (2.5 mL) was added  $\text{TsCl}$  (106.0 mg, 1.1 equiv.) at 0 °C. The whole was stirred at 0 °C for 1 hr. The reaction was quenched with water and the mixture was extracted with  $\text{CH}_2\text{Cl}_2$ . The solvent was evaporated and the residue was purified with recrystallization (ethanol) to afford **3h** (199.9 mg, 93%, colorless solid).

Mp.: 211.0-211.5 °C.  $^1\text{H}$  NMR ( $\text{CDCl}_3$ ):  $\delta$  8.23 (1H, d,  $J=8.8$  Hz), 8.05 (1H, dd,  $J=2.0, 8.8$  Hz), 7.93 (1H, d,  $J=1.6$  Hz), 4.42-4.35 (2H, m), 3.11 (2H, d,  $J=12.0$  Hz), 2.71 (3H, s), 2.48-2.38 (2H, m), 2.15-2.07 (4H, m).  $^{13}\text{C}$  NMR ( $\text{CDCl}_3$ ):  $\delta$  170.7, 152.6, 137.5, 130.7, 127.2, 127.0, 119.8, 64.8, 22.6, 19.6, 13.5. HRMS (ESI-TOF,  $[\text{M}-\text{PF}_6]^\oplus$ ): Calcd. for  $\text{C}_{13}\text{H}_{16}\text{BrN}_2^+$  279.0491. Found: 227.0496. Anal. Calcd. for  $\text{C}_{13}\text{H}_{16}\text{BrF}_6\text{N}_2\text{P}$ : C, 36.73; H, 3.79; N, 6.59. Found: C, 36.76; H, 3.84; N, 6.55.

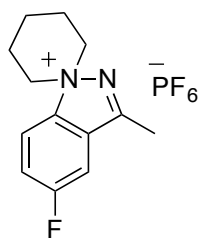

**3i**. To a solution of **7i** (119.3 mg, 0.50 mmol), pyridine (160.0  $\mu\text{L}$ , 4.0 equiv.) and  $\text{KPF}_6$  (190.0 mg, 2.0 equiv.) in  $\text{CH}_2\text{Cl}_2$  (2.5 mL) was added  $\text{TsCl}$  (106.0 mg, 1.1 equiv.) at 0 °C. The whole was stirred at 0 °C for 1 hr. The reaction was quenched with water and the mixture was extracted with  $\text{CH}_2\text{Cl}_2$ . The solvent was evaporated and the residue was purified with recrystallization (ethanol) to afford **3i** (159.2 mg, 87%, colorless solid).

Mp.: 179.5-181.5 °C. NMR ( $\text{CDCl}_3$ ):  $\delta$  8.17-8.13 (1H, m), 7.67-7.62 (1H, m), 7.58-7.55 (1H, m), 4.20 (2H, t,  $J=12.4$  Hz), 3.22 (2H, dd,  $J=1.6, 12.0$  Hz), 2.72 (3H, s), 2.54-2.41 (2H, m), 2.16-2.11 (3H, m), 2.04-1.97 (1H, m).  $^{13}\text{C}$  NMR ( $\text{CDCl}_3$ ):  $\delta$  171.4, 164.7 (d,  $J=253.5$  Hz), 149.4 (d,  $J=2.2$  Hz), 131.6 (d,  $J=10.1$  Hz), 121.6 (d,  $J=25.9$  Hz), 119.5 (d,  $J=9.6$  Hz), 111.6 (d,  $J=25.5$  Hz), 64.9, 22.6, 20.0, 13.3. HRMS (ESI-TOF,  $[\text{M}-\text{PF}_6]^\oplus$ ): Calcd. for  $\text{C}_{13}\text{H}_{16}\text{FN}_2^+$ : 219.1292. Found: 219.1292. Anal. Calcd. for  $\text{C}_{13}\text{H}_{16}\text{F}_7\text{N}_2\text{P}$ : C, 42.87; H, 4.43; N, 7.69. Found C 42.68; H, 4.43; N, 7.69.

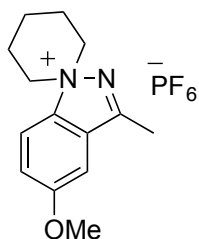

**3j**. To a solution of **7j** (79.4 mg, 0.32 mmol), pyridine (100.0  $\mu\text{L}$ , 4.0 equiv.) and  $\text{KPF}_6$  (120.0 mg, 2.0 equiv.) in  $\text{CH}_2\text{Cl}_2$  (1.5 mL) was added  $\text{TsCl}$  (70.0 mg, 1.1 equiv.) at 0 °C. The whole was stirred at 0 °C for 1 hr. The

reaction was quenched with water and the mixture was extracted with  $\text{CH}_2\text{Cl}_2$ . The solvent was evaporated and the residue was purified with recrystallization (ethanol) to afford **3i** (110.1 mg, 91%, colorless solid).  
 Mp.: 169-170 °C.  $^1\text{H}$  NMR ( $\text{CD}_2\text{Cl}_2$ ):  $\delta$  7.91 (1H, d,  $J=8.8$  Hz), 7.37 (1H, dd,  $J=2.8, 9.2$  Hz), 7.20 (1H, d,  $J=2.4$  Hz), 4.08 (2H, dt,  $J=3.2, 12.0$  Hz), 3.92 (3H, s), 3.11-3.08 (2H, m), 2.63 (3H, s), 2.45-2.34 (2H, m), 2.09-2.03 (3H, m), 1.95-1.87 (1H, m).  $^{13}\text{C}$  NMR ( $\text{CD}_2\text{Cl}_2$ ):  $\delta$  173.8, 165.1, 148.2, 132.8, 122.4, 120.2, 110.1, 66.8, 58.5, 24.5, 22.0, 15.2. HRMS (ESI-TOF,  $[\text{M-PF}_6]^\oplus$ ): Calcd. for  $\text{C}_{14}\text{H}_{19}\text{N}_2\text{O}^\oplus$ : 231.1492. Found: 231.1498. Anal. Calcd. for  $\text{C}_{14}\text{H}_{19}\text{F}_6\text{N}_2\text{OP}$ : C, 44.69; H, 5.09; N, 7.44. Found C, 44.68; H, 5.10; N, 7.35.

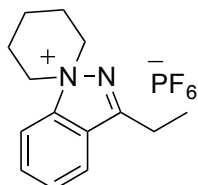

**3k.** To a solution of **7k** (126.7 mg, 0.55 mmol), pyridine (180.0  $\mu\text{L}$ , 4 equiv.) and  $\text{KPF}_6$  (200.0 mg, 2 equiv.) in  $\text{CH}_2\text{Cl}_2$  (3.0 mL) was added  $\text{TsCl}$  (115.0 mg, 1.1 equiv.) at 0 °C. The whole was stirred at 0 °C for 1 hr. The reaction was quenched with water and the mixture was extracted with  $\text{CH}_2\text{Cl}_2$ . The solvent was evaporated and the residue was purified with recrystallization (ethanol) to afford **7f** (162.7 mg, 83%, white solid).

Mp.: 136-138 °C.  $^1\text{H}$  NMR ( $\text{CD}_2\text{Cl}_2$ ):  $\delta$  8.14 (1H, d,  $J=8.0$  Hz), 8.00-7.96 (1H, m), 7.91-7.89 (2H, m), 4.23 (2H, dt,  $J=3.2, 12.8$  Hz), 3.19-3.10 (4H, m), 2.58-2.45 (2H, m), 2.19-2.13 (3H, m), 2.08-2.00 (1H, m), 1.51 (3H, t,  $J=7.6$  Hz).  $^{13}\text{C}$  NMR ( $\text{CD}_2\text{Cl}_2$ ):  $\delta$  176.1, 154.1, 134.6, 133.3, 129.1, 124.9, 118.2, 65.2, 22.9, 22.2, 20.5, 10.1. HRMS (ESI-TOF,  $[\text{M-PF}_6]^\oplus$ ): Calcd. for  $\text{C}_{14}\text{H}_{19}\text{N}_2^\oplus$ , 215.1543. Found: 215.1535. Anal. Calcd. for  $\text{C}_{14}\text{H}_{19}\text{F}_6\text{N}_2\text{P}$ : C, 46.67; H, 5.32; N, 7.78. Found C, 46.60; H, 5.35; N, 7.69.

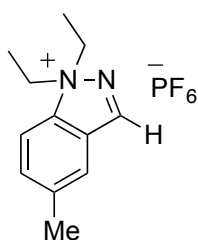

**3j.** To a solution of **7k** (224.2 mg, 1.09 mmol), pyridine (350.0  $\mu\text{L}$ , 4 equiv.) and  $\text{KPF}_6$  (400.0 mg, 2 equiv.) in  $\text{CH}_2\text{Cl}_2$  (3.0 mL) was added  $\text{TsCl}$  (230.0 mg, 1.1 equiv.) at 0 °C. The whole was stirred at 0 °C for 1 hr. The reaction was quenched with water and the mixture was extracted with  $\text{CH}_2\text{Cl}_2$ . The solvent was evaporated and the residue was purified with recrystallization (ethanol) to afford **7f** (300.3 mg, 83%, white solid).

Mp.: 142-143 °C.  $^1\text{H}$  NMR ( $\text{CD}_2\text{Cl}_2$ ):  $\delta$  9.11 (1H, s), 7.89 (1H, d,  $J=8.4$  Hz), 7.81-7.83 (2H, m), 4.34-4.18 (4H, m), 2.61 (3H, s), 0.92 (6H, t,  $J=6.8$  Hz).  $^{13}\text{C}$  NMR ( $\text{CD}_2\text{Cl}_2$ ):  $\delta$  163.6, 145.6, 144.5, 135.6, 131.1, 126.0, 117.4, 61.4, 21.2, 7.4. HRMS (ESI-TOF,  $[\text{M-PF}_6]^\oplus$ ): Calcd. for  $\text{C}_{12}\text{H}_{17}\text{N}_2^\oplus$ : 189.1386. Found: 189.1389. Anal. Calcd. for  $\text{C}_{12}\text{H}_{17}\text{F}_6\text{N}_2\text{P}$ : C, 43.12; H, 5.13; N, 8.38. Found C, 43.18; H, 5.16; N, 8.34.

#### Reaction of **7l** with $\text{TsCl}$ .

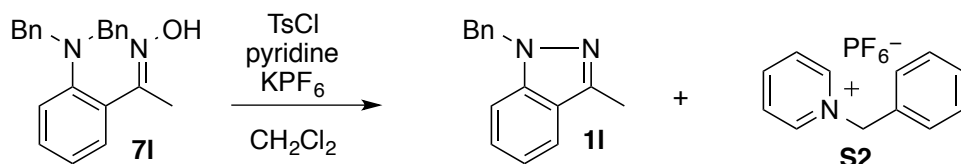

To a solution of **7l** (200.0 mg, 0.61 mmol), pyridine (200.0  $\mu\text{L}$ , 4 equiv.) and  $\text{KPF}_6$  (220.0 mg, 2 equiv.) in  $\text{CH}_2\text{Cl}_2$  (3.0 mL) was added  $\text{TsCl}$  (130.0 mg, 1.1 equiv.) at 0 °C. The whole was stirred at 0 °C for 1 hr. The reaction was quenched with water and the mixture was extracted with  $\text{CH}_2\text{Cl}_2$ . The solvent was evaporated and the residue was purified with recrystallization (ethanol) to give **S2** (122.0 mg, 64%, white solid). The residue was purified with column chromatography (hexane: ethyl acetate= 9: 1) to afford **1l** (122.2 mg, off-white solid, 91%)

**S2.** Mp.: 150.0-152.0 °C.  $^1\text{H}$  NMR ( $\text{CDCl}_3$ ):  $\delta$  8.76 (2H, d,  $J=5.6$  Hz), 8.53 (1H, t,  $J=8.0$  Hz), 8.08 (2H, t,  $J=7.2$

Hz), 7.54-7.52 (3H, m), 7.48-7.46 (2H, m), 5.78 (2H, s)  $^{13}\text{C}$  NMR ( $\text{CDCl}_3$ ):  $\delta$  146.0, 144.0, 131.4, 130.5, 130.0, 129.4, 128.8, 65.6. HRMS (ESI-TOF,  $[\text{M}-\text{PF}_6]^\dagger$ ): Calcd. for  $\text{C}_{12}\text{H}_{12}\text{N}^\dagger$ : 170.0964. Found: 170.0971. Anal. Calcd. for  $\text{C}_{12}\text{H}_{12}\text{F}_6\text{NP}$ : C, 45.73; H, 3.84; N, 4.44. Found C, 45.70; H, 3.96; N, 4.40.

**11.**<sup>[5]</sup> Mp.: 51.5-53.0 °C.  $^1\text{H}$  NMR ( $\text{CDCl}_3$ ):  $\delta$  7.70 (1H, dt,  $J=1.2, 8.4$  Hz), 7.37-7.27 (5H, m), 7.21 (2H, dd,  $J=2.0, 8.0$  Hz), 7.17-7.13 (1H, m), 5.57 (2H, s), 2.64 (3H, s)  $^{13}\text{C}$  NMR ( $\text{CDCl}_3$ ):  $\delta$  141.9, 140.5, 137.3, 128.7, 127.6, 127.1, 126.4, 123.7, 120.5, 119.8, 109.2, 52.6, 12.0.

#### Decomposition of **3c** in concentrated HCl.

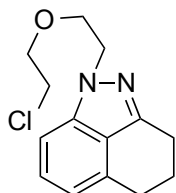

**1c.** A solution of **3c** (112.3 mg, 0.30 mmol) in 1,4-dioxane (1.5 mL) and concentrated hydrochloric acid (1.5 ml) was heated to reflux. The mixture was for 4 hr and cooled to room temperature.  $^1\text{H}$  NMR confirmed the presence of unreacted **3c** (59%, dichloroethane as internal standard) in the reaction mixture. The reaction mixture was diluted with water, neutralized with saturated solution of  $\text{NaHCO}_3$ , and the mixture was extracted with  $\text{CH}_2\text{Cl}_2$ . The solvent was evaporated and the residue was purified with column chromatography (hexane: ethyl acetate= 3: 1) to afford **1c** (22.4 mg, 28%, colorless oil).

$^1\text{H}$  NMR ( $\text{CDCl}_3$ ):  $\delta$  7.33-7.31 (1H, m), 7.21 (1H, dd,  $J=0.4, 8.4$  Hz), 6.84 (1H, dd,  $J=0.4, 6.8$  Hz), 4.52 (2H, t,  $J=5.6$  Hz), 3.97 (2H, t,  $J=6.0$  Hz), 3.65 (2H, t,  $J=6.0$  Hz), 3.52 (2H, t,  $J=6.0$  Hz), 3.03 (2H, t,  $J=6.0$  Hz), 2.96 (2H, t,  $J=6.0$  Hz), 2.19 (2H, quint.,  $J=6.0$  Hz).  $^{13}\text{C}$  NMR ( $\text{CDCl}_3$ ):  $\delta$  145.4, 139.3, 134.6, 127.7, 123.3, 115.8, 106.5, 71.3, 70.4, 40.0, 42.6, 26.7, 24.7, 23.3. HRMS (ESI-TOF,  $[\text{M}+\text{Na}]^\dagger$ ): Calcd. for  $\text{C}_{14}\text{H}_{17}\text{ClN}_2\text{NaO}^\dagger$ : 287.0922. Found: 287.0942.

#### Reaction of **7l** with TsCl

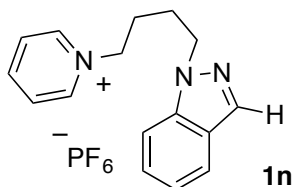

To a solution of **7n** (102.0 mg, 0.53 mmol), pyridine (170.0  $\mu\text{L}$ , 4 equiv.) and  $\text{KPF}_6$  (200.0 mg, 2 equiv.) in  $\text{CH}_2\text{Cl}_2$  (3.0 mL) was added TsCl (110.0 mg, 1.1 equiv.) at 0 °C. The whole was stirred at 0 °C for 1 hr. The reaction was quenched with water and the mixture was extracted with  $\text{CH}_2\text{Cl}_2$ . The solvent was evaporated and the residue was purified with recrystallization (ethanol) to give **1n** (110.8 mg, 53%, off-white solid).

**1n.** Mp.: 170.0-171.0 °C.  $^1\text{H}$  NMR ( $\text{CD}_3\text{OD}$ ):  $\delta$  8.91 (2H, d,  $J=5.6$  Hz), 8.58 (1H, tt,  $J=8.0, 1.2$  Hz), 8.09 (2H, t,  $J=7.2$  Hz), 8.04 (1H, d,  $J=0.8$  Hz), 7.77 (1H, dt,  $J=8.4, 1.2$  Hz), 7.59 (1H, dd,  $J=8.4, 0.8$  Hz), 7.45-7.41 (1H, m), 7.20-7.16 (1H, m), 4.64-4.60 (2H, m), 4.54-4.52 (2H, m), 2.03-2.00 (4H, m).  $^{13}\text{C}$  NMR ( $\text{DMSO}-d_6$ ):  $\delta$  146.0, 145.2, 139.6, 133.2, 128.6, 126.5, 123.9, 121.4, 120.9, 109.9, 60.8, 47.7, 28.6, 26.4. HRMS (ESI-TOF,  $[\text{M}-\text{PF}_6]^\dagger$ ): Calcd. for  $\text{C}_{16}\text{H}_{18}\text{N}_3^\dagger$ : 252.1495. Found: 252.1492.

#### Conversion of **3l** into **7l**.

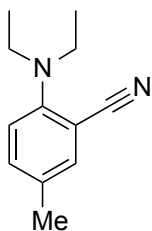

**7l.** A solution of **3l** (30.0 mg, 0.09 mmol) and  $K_2CO_3$  (50.0 mg, 4 equiv.) in water (0.5 mL) was stirred at ambient temperature for 2 hr. The mixture was extracted with dichloromethane and concentrated. The residue was purified with column chromatography (hexane: ethyl acetate= 4: 1) to afford **7l** (16.2 mg, 94%, yellow oil).  $^1H$  NMR ( $CDCl_3$ ):  $\delta$  7.35 (1H, d,  $J=1.6$  Hz), 7.24 (1H, dd,  $J=1.6, 8.8$  Hz), 6.90 (1H, d,  $J=8.4$ ), 3.34 (4H, q,  $J=7.2$  Hz), 2.29 (3H, s), 1.15 (6H, t,  $J=7.2$  Hz).  $^{13}C$  NMR ( $CDCl_3$ ):  $\delta$  151.5, 134.8, 134.1, 129.7, 119.5, 110.6, 104.4, 46.7, 20.1, 12.6. HRMS (ESI-TOF,  $[M+H]^+$ ): Calcd. for:  $C_{12}H_{17}N_2^+$ : 189.1386. Found: 189.1373.

### Hydrogenation of 3a.

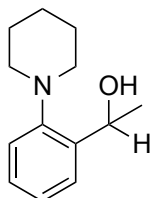

**8a.** A solution of **3a** (103.9 mg, 0.30 mmol) and Pd/C (10%, 10.0 mg) in methanol (3.0 mL) was stirred at 20 °C under hydrogen atmosphere for 2hr. The reaction mixture was filtered through a pad of Celite and concentrated. The mixture was purified with column chromatography (hexane: ethyl acetate= 4: 1) to afford **8a** (49.7 mg, 81%, colorless oil).

$^1H$  NMR ( $CDCl_3$ ):  $\delta$  7.40 (1H, brs), 7.27-7.22 (2H, m), 7.18-7.12 (2H, m), 5.06 (1H, q,  $J= 6.4$  Hz), 2.95-2.89 (4H, br), 1.79-1.73 (4H, m), 1.61-1.53 (5H, m).  $^{13}C$  NMR ( $CDCl_3$ ):  $\delta$  151.4, 140.2, 127.8, 127.0, 125.6, 122.4, 69.6, 54.9, 26.6, 24.4, 23.9. HRMS (ESI-TOF,  $[M+H]^+$ ): Calcd. for:  $C_{13}H_{20}NO^+$ : 206.1539. Found: 206.1550.

### synthesis of 1o.

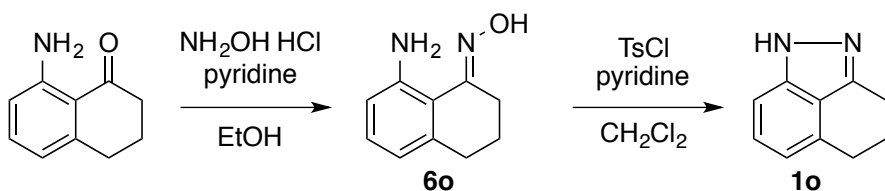

A solution of 8-amino-3,4-dihydronaphthalen-1(2H)-one (160.0 mg, 1.00 mmol), pyridine (1.0 mL), hydroxylamine hydrochloride (140.0 mg, 2.0 equiv.) in 5 mL of ethanol was heated to reflux for 1hr. The reaction mixture was evaporated, diluted with dichloromethane and washed with water. The solvent was evaporated to afford **6o** (yellow solid, 155.7 mg, 88%). The crude product was used in further steps without purification. Mp.: 107.5-110.0 °C.  $^1H$  NMR ( $CDCl_3$ ):  $\delta$  7.00 (1H, t,  $J= 8.0$  Hz), 6.53 (1H, d,  $J= 8.4$  Hz), 6.49 (1H, d,  $J= 7.6$  Hz), 5.77 (2H, brs), 2.86 (2H, t,  $J= 6.4$  Hz), 2.70 (2H, t,  $J= 6.0$  Hz), 1.84-1.77 (2H, m).  $^{13}C$  NMR ( $CDCl_3$ ):  $\delta$  159.4, 146.7, 141.8, 129.3, 117.3, 114.7, 113.6, 31.2, 24.6, 21.1. HRMS (ESI-TOF,  $[M+H]^+$ ): Calcd. for  $C_{10}H_{13}N_2O^+$ : 177.1022. Found: 177.1020

To a solution of **6o** (126.9 mg, 0.72 mmol), pyridine (230.0  $\mu$ L, 4 equiv.) in  $CH_2Cl_2$  (3.5 mL) was added TsCl (150.0 mg, 1.1 equiv.) at 0 °C. The whole was stirred at 0 °C for 1 hr. The reaction was quenched with water and the mixture was extracted with  $CH_2Cl_2$ . The solvent was evaporated and the residue was purified with recrystallization (ethanol) to afford **1o** (white solid, 54.3 mg, 48%) Mp.: 116.0-117.0 °C.  $^1H$  NMR ( $CDCl_3$ ):  $\delta$  10.42 (1H, brs), 7.31-7.27 (1H, m), 7.20 (1H, dd,  $J= 0.8, 8.0$  Hz), 6.85 (1H, d,  $J= 6.4$  Hz), 3.05 (2H, t,  $J= 5.6$  Hz), 2.95 (2H, t,  $J= 6.0$  Hz), 2.21-2.15 (2H, m)  $^{13}C$  NMR ( $CDCl_3$ ):  $\delta$  146.7, 139.1, 134.6, 128.0, 122.7, 116.2, 106.9, 26.7, 24.8, 23.4. HRMS (ESI-TOF,  $[M+Na]^+$ ): Calcd. for  $C_{10}H_{10}N_2Na^+$ : 181.0736. Found: 181.0748. Anal. Calcd. for  $C_{10}H_{10}N_2$ : C, 75.92; H, 6.37; N, 17.71. Found: C, 75.87; H, 6.47; N, 17.80.

## Single crystal X-ray diffraction experiment

Single crystal of **3a** was obtained by recrystallization from ethanol. Single crystal of **3c** was obtained by recrystallization from CH<sub>2</sub>Cl<sub>2</sub>/EtOAc. Single crystal of **3g** was obtained by recrystallization from CH<sub>2</sub>Cl<sub>2</sub>/CHCl<sub>3</sub>. Single crystal of **1o** was obtained by recrystallization from CH<sub>2</sub>Cl<sub>2</sub>/Hexane.

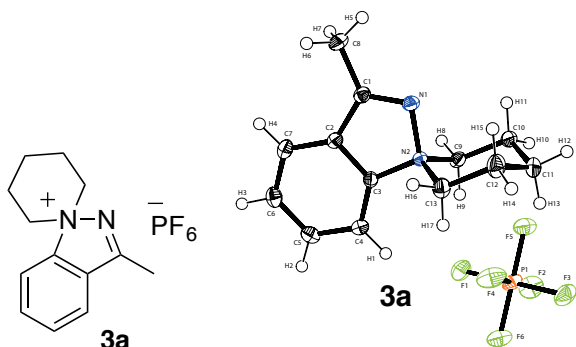

The crystal was immersed in Paraton-N oil and placed in the N<sub>2</sub> cold stream at 100 K. The diffraction experiment was performed in a Bruker D8VENTURE system (PHOTON-100 CMOS detector, CuK $\alpha$  :  $\lambda = 1.54178 \text{ \AA}$ ). Absorption correction was performed by an empirical method implemented in SADABS.<sup>[S5]</sup> Structure solution and refinement were performed by using SHELXT-2014/5<sup>[S6]</sup> and SHELXL-2016/6<sup>[S7]</sup>.

C<sub>13</sub>H<sub>17</sub>F<sub>6</sub>N<sub>2</sub>P, *Mr* = 346.25; monoclinic, space group *P2<sub>1</sub>/n*, *Z* = 4, *D*<sub>calc</sub> = 1.511 g·cm<sup>-3</sup>, *a* = 8.8739(5), *b* = 12.9265(7), *c* = 13.4682(7) Å,  $\phi_0 = 99.885(2)^\circ$ , *V* = 1521.98(14) Å<sup>3</sup>, 20163 observed and 2860 independent [*I* > 2 $\sigma$ (*I*)] reflections, 267 parameters, final *R*<sub>1</sub> = 0.0333, *wR*<sub>2</sub> = 0.0809, *S* = 1.065 [*I* > 2 $\sigma$ (*I*)].

All non-hydrogen atoms were refined anisotropically. All hydrogen atoms were found by the Fourier map and refined isotropically.

Empirical formula C<sub>13</sub> H<sub>17</sub> F<sub>6</sub> N<sub>2</sub> P  
Formula weight 346.25  
Temperature 100(2) K  
Wavelength 1.54178 Å  
Crystal system Monoclinic  
Space group *P2<sub>1</sub>/n*  
Unit cell dimensions *a* = 8.8739(5) Å *a* = 90°.  
*b* = 12.9265(7) Å *b* = 99.885(2)°.  
*c* = 13.4682(7) Å *g* = 90°.  
Volume 1521.98(14) Å<sup>3</sup>  
*Z* 4  
Density (calculated) 1.511 Mg/m<sup>3</sup>  
Absorption coefficient 2.206 mm<sup>-1</sup>  
*F*(000) 712  
Crystal size 0.100 x 0.080 x 0.050 mm<sup>3</sup>  
Theta range for data collection 4.776 to 78.669°.  
Index ranges -10 ≤ *h* ≤ 11, -15 ≤ *k* ≤ 16, -16 ≤ *l* ≤ 16  
Reflections collected 20163  
Independent reflections 3206 [*R*(int) = 0.0399]  
Completeness to theta = 67.679° 100.0 %  
Absorption correction Empirical  
Max. and min. transmission 0.8835 and 0.8350  
Refinement method Full-matrix least-squares on *F*<sup>2</sup>  
Data / restraints / parameters 3206 / 0 / 267  
Goodness-of-fit on *F*<sup>2</sup> 1.065  
Final *R* indices [*I* > 2 $\sigma$ (*I*)] *R*<sub>1</sub> = 0.0333, *wR*<sub>2</sub> = 0.0809  
*R* indices (all data) *R*<sub>1</sub> = 0.0382, *wR*<sub>2</sub> = 0.0870  
Extinction coefficient n/a  
Largest diff. peak and hole 0.356 and -0.599 e.Å<sup>-3</sup>

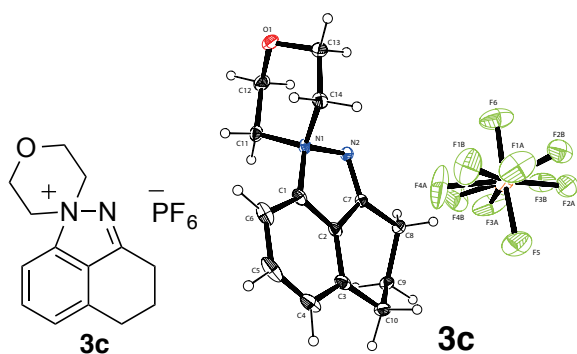

All non-hydrogen atoms were refined anisotropically. Hydrogen atoms were refined isotropically on the calculated positions using a riding model (AFIX 23 and 43) with  $U_{\text{iso}}$  values constrained to  $1.2 U_{\text{eq}}$  of their parent atoms. A pair of disordered fluorine atoms (F1-F4) of the hexafluorophosphate anion was refined with PART, and the ratio was ca. 50/50.

Empirical formula C<sub>14</sub> H<sub>17</sub> F<sub>6</sub> N<sub>2</sub> O P  
 Formula weight 374.26  
 Temperature 100(2) K  
 Wavelength 1.54178 Å  
 Crystal system Monoclinic  
 Space group P2<sub>1</sub>/n  
 Unit cell dimensions a = 9.3512(9) Å a = 90°.  
 b = 14.2117(14) Å b = 110.717(2)°.  
 c = 12.5086(12) Å g = 90°.  
 Volume 1554.9(3) Å<sup>3</sup>  
 Z 4  
 Density (calculated) 1.599 Mg/m<sup>3</sup>  
 Absorption coefficient 2.261 mm<sup>-1</sup>  
 F(000) 768  
 Crystal size 0.220 x 0.220 x 0.100 mm<sup>3</sup>  
 Theta range for data collection 4.896 to 78.787°.  
 Index ranges -11 ≤ h ≤ 11, -17 ≤ k ≤ 18, -15 ≤ l ≤ 15  
 Reflections collected 19337  
 Independent reflections 3254 [R(int) = 0.0337]  
 Completeness to theta = 67.679° 99.7 %  
 Absorption correction Empirical  
 Max. and min. transmission 0.7508 and 0.6422  
 Refinement method Full-matrix least-squares on F<sup>2</sup>  
 Data / restraints / parameters 3254 / 0 / 254  
 Goodness-of-fit on F<sup>2</sup> 1.048  
 Final R indices [I > 2σ(I)] R1 = 0.0516, wR2 = 0.1277  
 R indices (all data) R1 = 0.0529, wR2 = 0.1287  
 Extinction coefficient n/a  
 Largest diff. peak and hole 0.827 and -0.516 e.Å<sup>-3</sup>



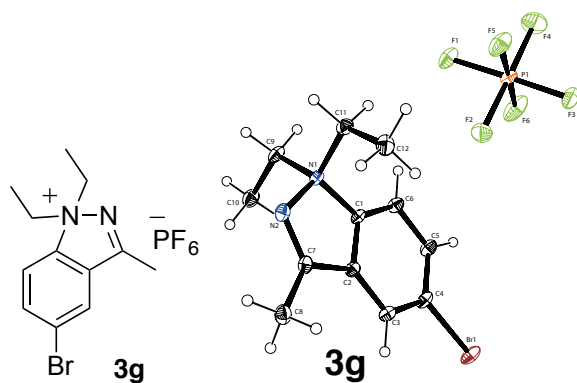

Formula weight 413.15  
 Temperature 100(2) K  
 Wavelength 1.54178 Å  
 Crystal system Monoclinic  
 Space group  $P2_1/n$   
 Unit cell dimensions  $a = 8.4310(7)$  Å  $a = 90^\circ$ .  
 $b = 10.6455(9)$  Å  $b = 91.537(2)^\circ$ .  
 $c = 17.7568(14)$  Å  $g = 90^\circ$ .  
 Volume 1593.1(2) Å<sup>3</sup>  
 Z 4  
 Density (calculated) 1.723 Mg/m<sup>3</sup>  
 Absorption coefficient 5.047 mm<sup>-1</sup>  
 F(000) 824  
 Crystal size 0.100 x 0.060 x 0.030 mm<sup>3</sup>  
 Theta range for data collection 4.844 to 79.243°.  
 Index ranges  $-10 \leq h \leq 10$ ,  $-13 \leq k \leq 13$ ,  $-21 \leq l \leq 22$   
 Reflections collected 20246  
 Independent reflections 3374 [R(int) = 0.0426]  
 Completeness to theta = 67.679° 99.9 %  
 Absorption correction Empirical  
 Max. and min. transmission 0.7958 and 0.6766  
 Refinement method Full-matrix least-squares on F<sup>2</sup>  
 Data / restraints / parameters 3374 / 0 / 202  
 Goodness-of-fit on F<sup>2</sup> 1.044  
 Final R indices [ $I > 2\sigma(I)$ ] R1 = 0.0309, wR2 = 0.0766  
 R indices (all data) R1 = 0.0342, wR2 = 0.0787  
 Extinction coefficient n/a  
 Largest diff. peak and hole 0.776 and -0.893 e.Å<sup>-3</sup>

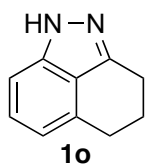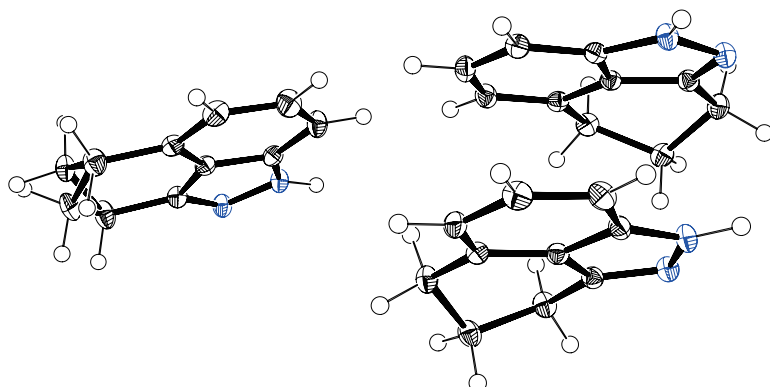

Empirical formula C<sub>10</sub> H<sub>10</sub> N<sub>2</sub>  
 Formula weight 158.20  
 Temperature 100 K  
 Wavelength 0.71073 Å  
 Crystal system Triclinic  
 Space group P -1  
 Unit cell dimensions a = 8.9125(14) Å a = 69.182(2)°.  
 b = 11.3351(18) Å b = 74.864(2)°.  
 c = 13.323(2) Å g = 87.348(2)°.  
 Volume 1212.8(3) Å<sup>3</sup>  
 Z 6  
 Density (calculated) 1.300 Mg/m<sup>3</sup>  
 Absorption coefficient 0.079 mm<sup>-1</sup>  
 F(000) 504  
 Crystal size 0.48 x 0.32 x 0.18 mm<sup>3</sup>  
 Theta range for data collection 1.925 to 27.282°.  
 Index ranges -11 ≤ h ≤ 11, -14 ≤ k ≤ 14, -17 ≤ l ≤ 16  
 Reflections collected 12590  
 Independent reflections 4933 [R(int) = 0.0150]  
 Completeness to theta = 25.000° 99.4 %  
 Absorption correction None  
 Refinement method Full-matrix least-squares on F<sup>2</sup>  
 Data / restraints / parameters 4933 / 0 / 347  
 Goodness-of-fit on F<sup>2</sup> 1.049  
 Final R indices [I > 2σ(I)] R1 = 0.0359, wR2 = 0.0950  
 R indices (all data) R1 = 0.0391, wR2 = 0.0978  
 Extinction coefficient n/a  
 Largest diff. peak and hole 0.303 and -0.207 e.Å<sup>-3</sup>

## Computational Studies

DFT calculations were performed with Gaussian 09.<sup>[S9]</sup> For energy calculations (**Scheme 1c**), geometries of molecules were fully optimized at B3LYP/def2-TZVPP level. This calculation level is able to reproduce the N-N bond length of indazole derivatives (**Figure S1**). For other computational studies (**Table 1** and **Figure 2**), Wave functions were generated at B3LYP/def2-TZVPP level using the structure obtained from X-ray diffraction experiments. Wave function analysis was conducted using Multiwfn.<sup>[S10]</sup> Topological analysis was conducted on the structure of charge neutral species, and ESP was calculated on the corresponding cations without counter ion ( $\text{PF}_6^-$ ). NICS value was calculated with GIAO-NMR method.

B3LYP/def2-TZVPP

|               |                                                                                                |                                                                                                |                                                                                                     |
|---------------|------------------------------------------------------------------------------------------------|------------------------------------------------------------------------------------------------|-----------------------------------------------------------------------------------------------------|
|               | 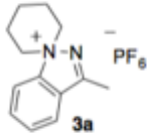<br><b>3a</b> | <br><b>3c</b> | <br><b>Br 3g</b> |
| Crystal       | 1.486                                                                                          | 1.511                                                                                          | 1.485                                                                                               |
| Computational | 1.479                                                                                          | 1.505                                                                                          | 1.475                                                                                               |
|               | <br><b>1a</b> | <br><b>1o</b> | <br><b>HO 2a</b> |
| Crystal       | 1.369                                                                                          | 1.382                                                                                          | 1.365                                                                                               |
| Computational | 1.358                                                                                          | 1.373                                                                                          | 1.371                                                                                               |

**Figure S1.** N-N bond lengths of indazoles, obtained from crystal structures and calculations (at the level of B3LYP/def2-TZVPP )

# NMR spectral of compounds

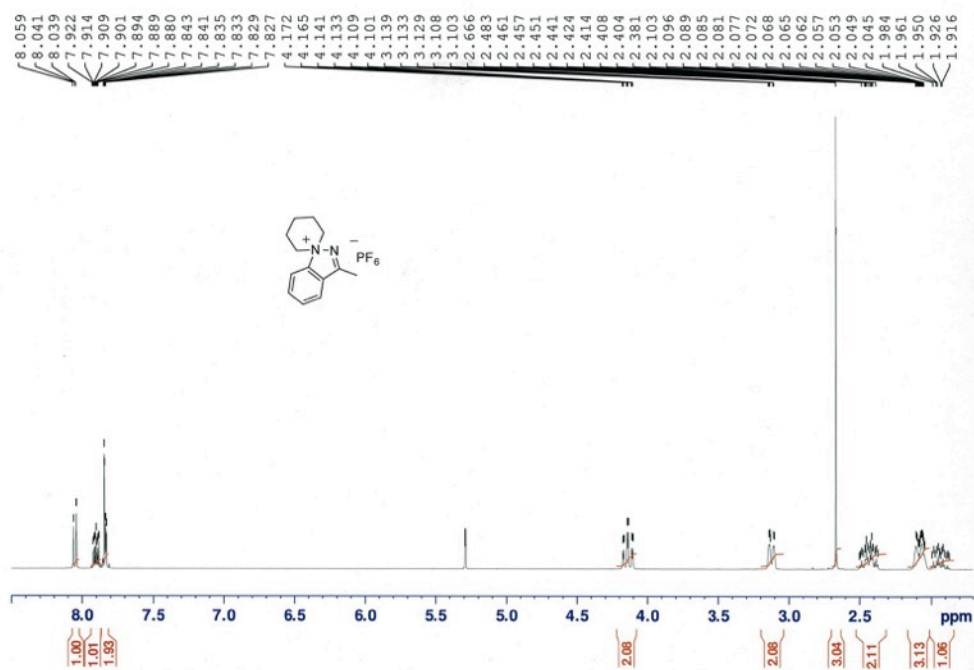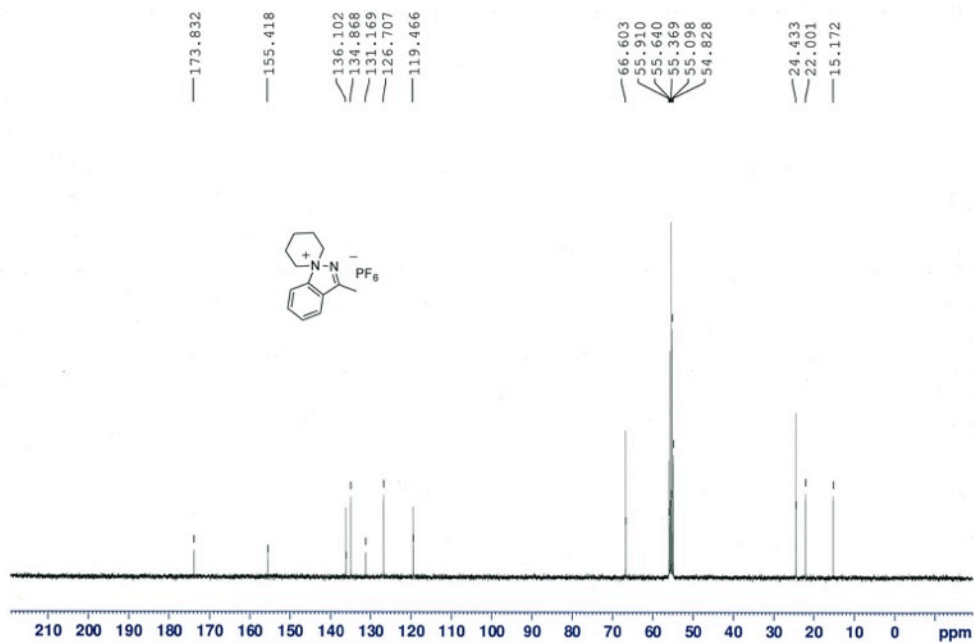

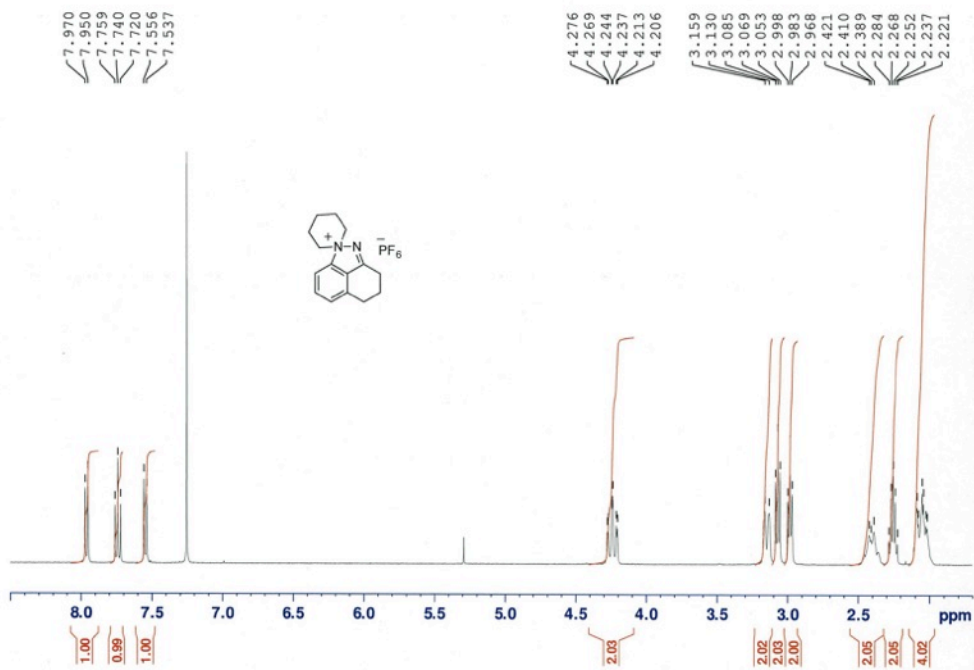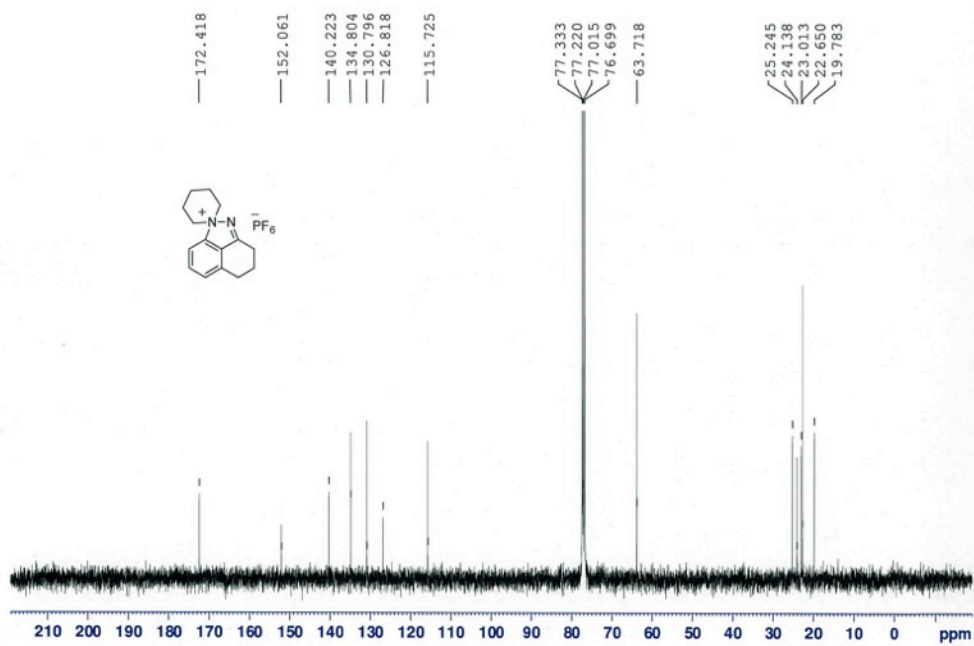

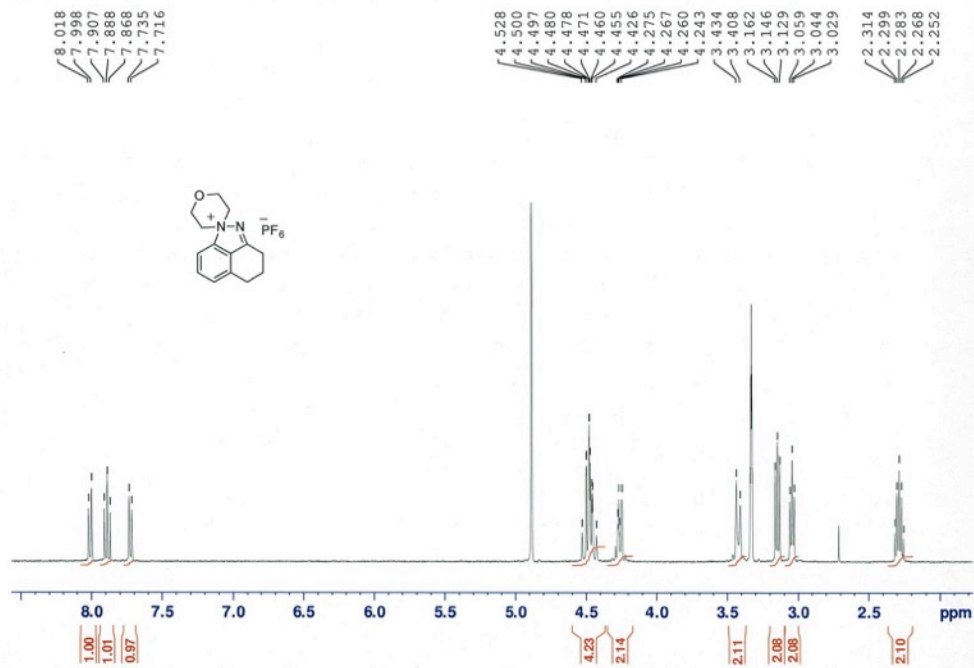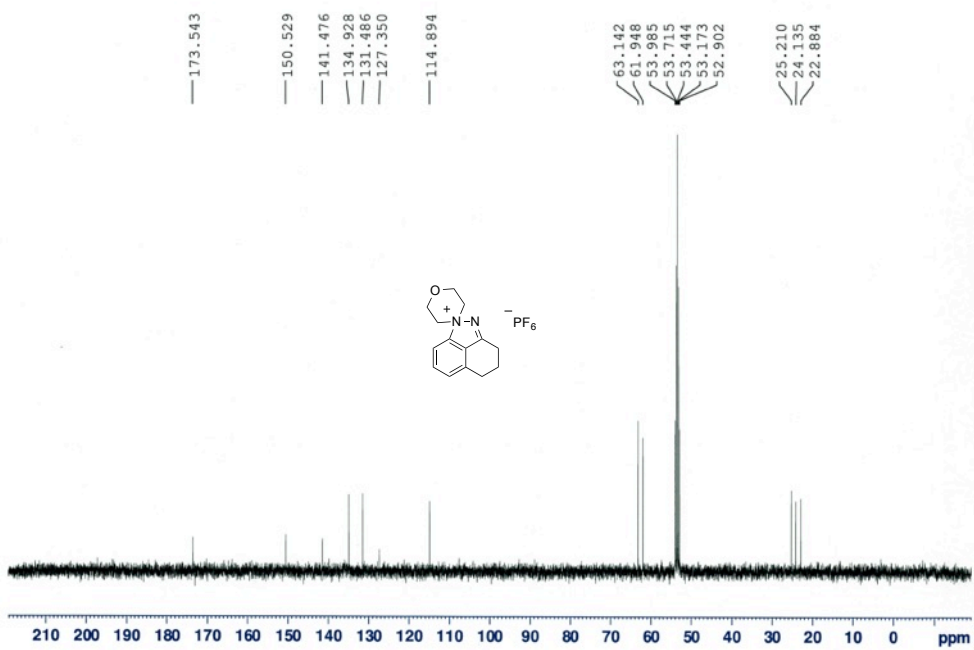

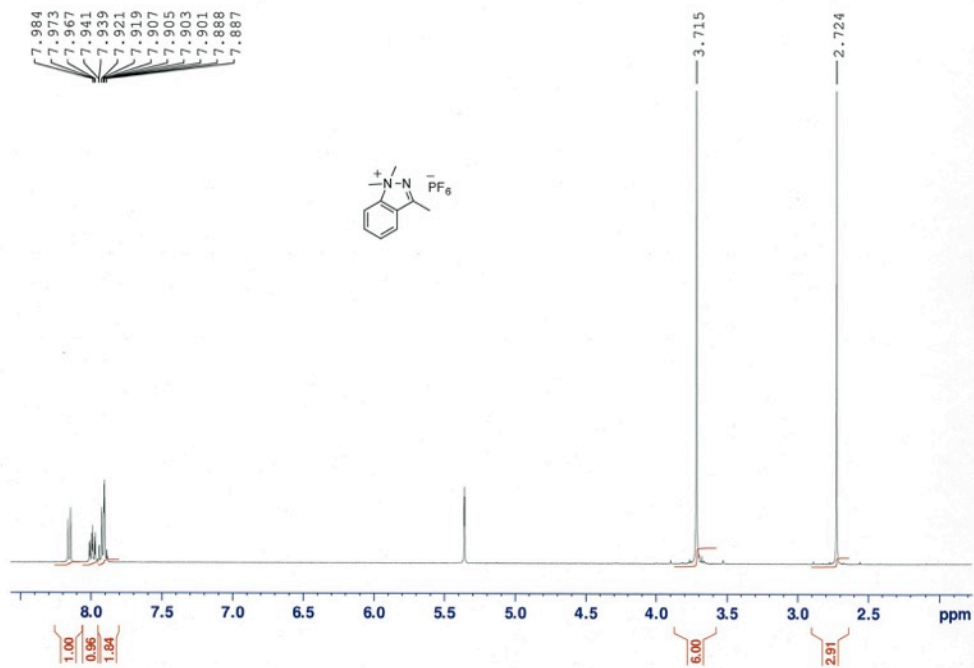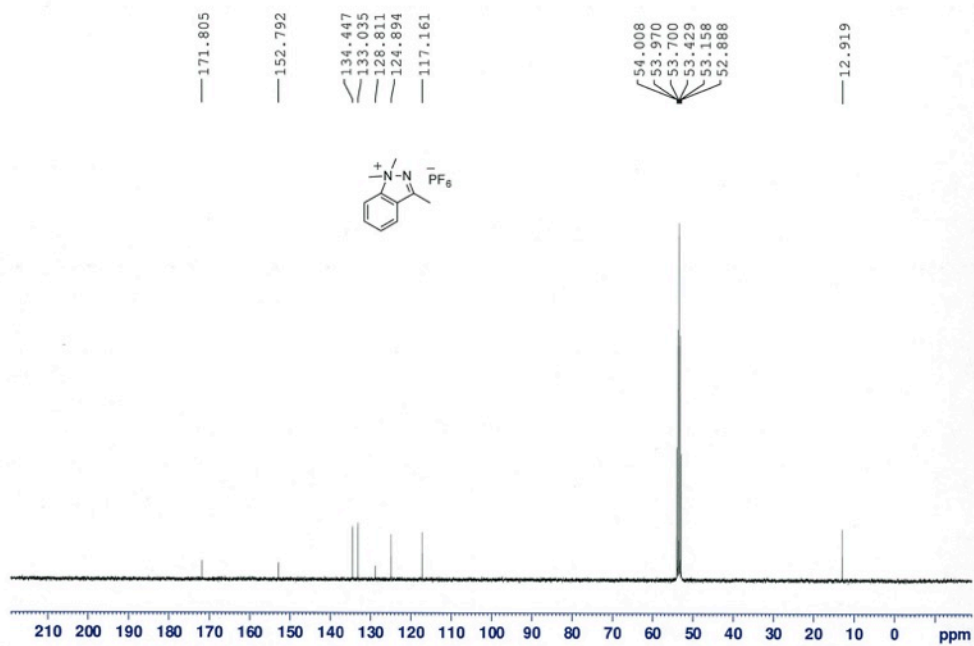

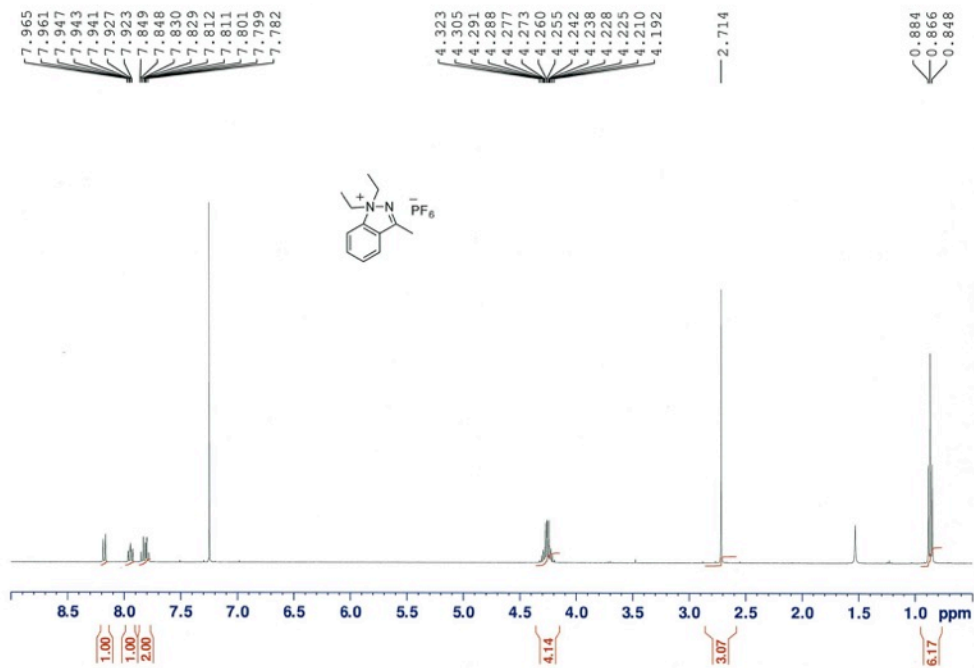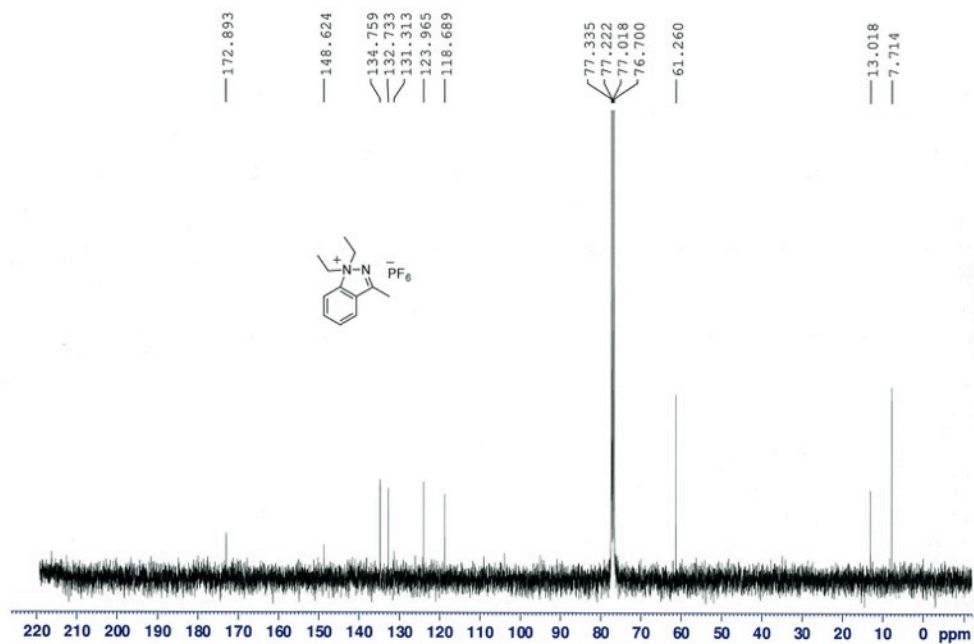



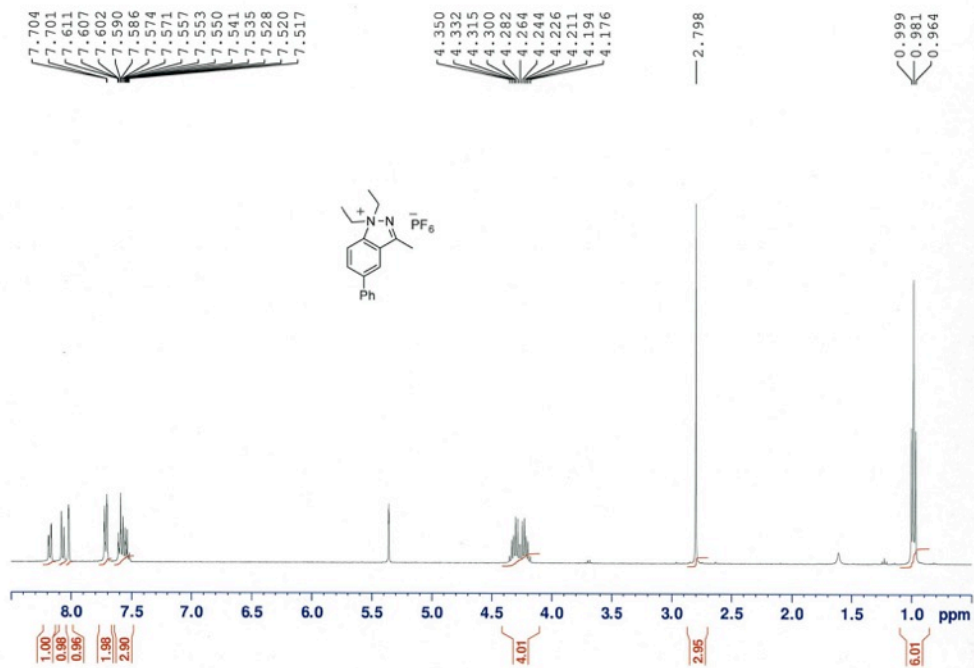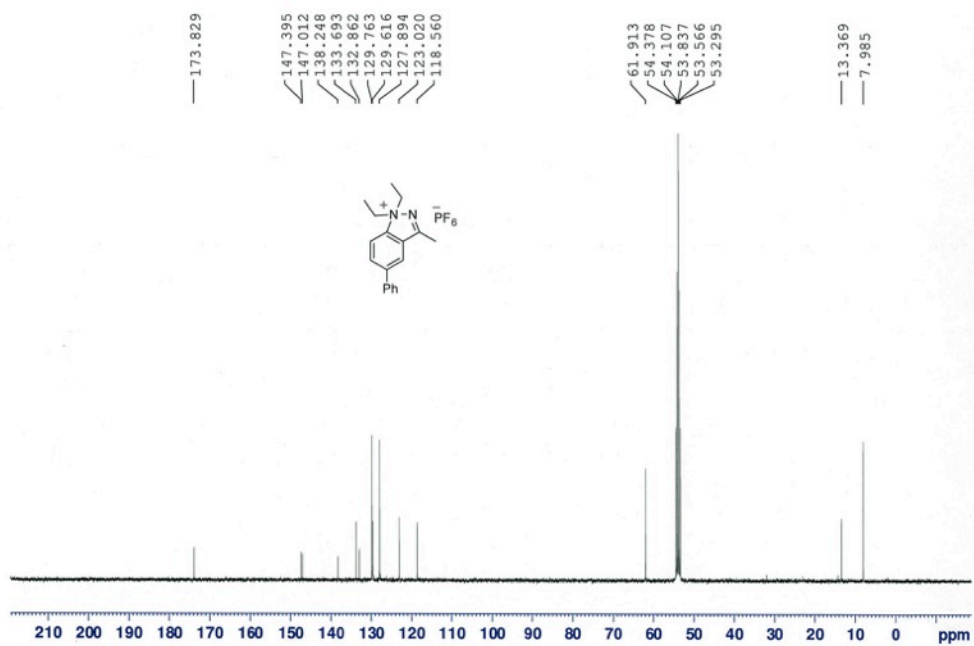

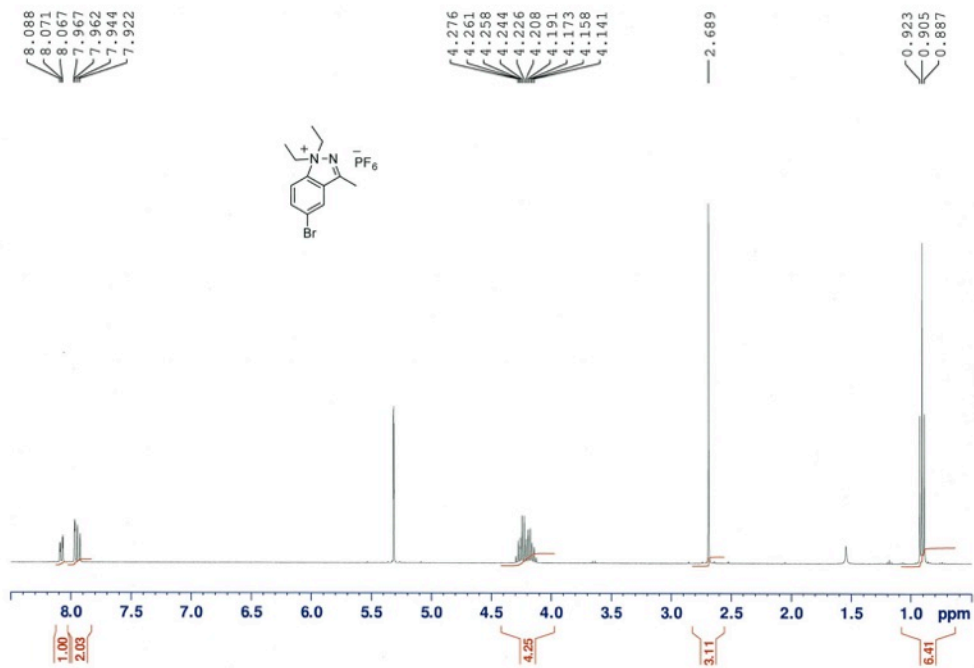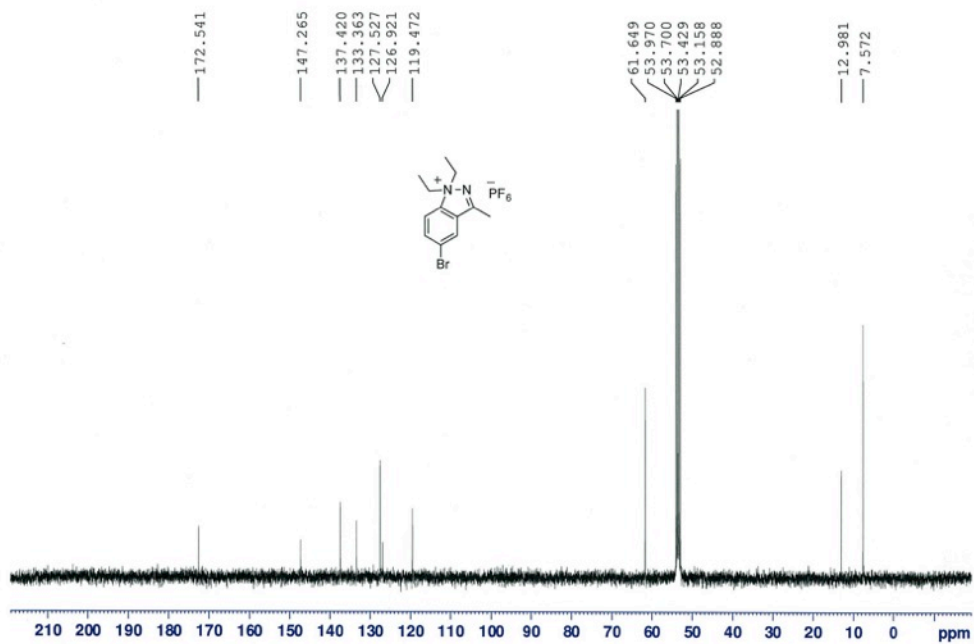

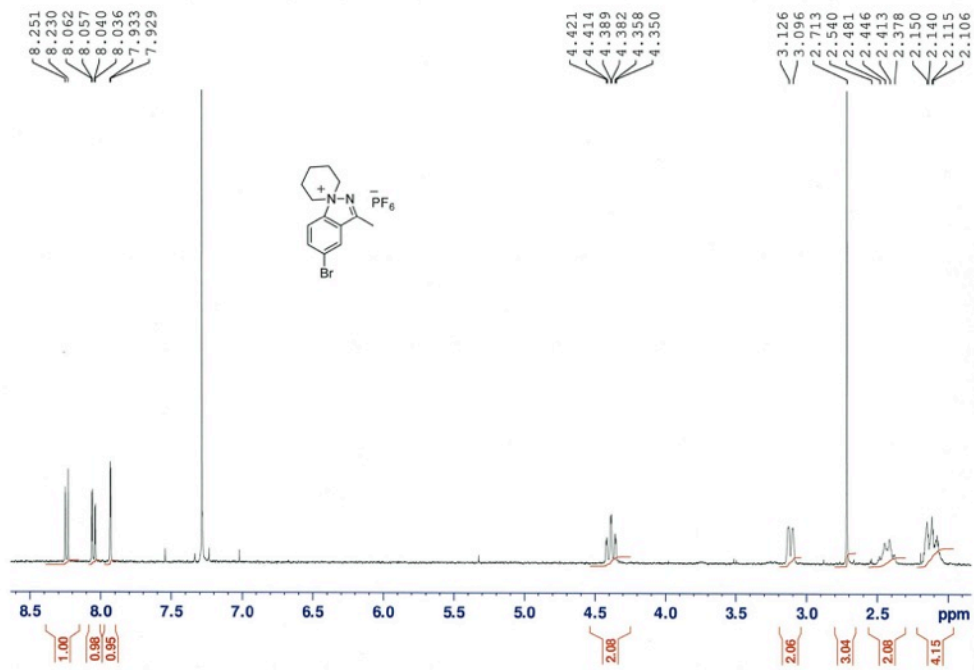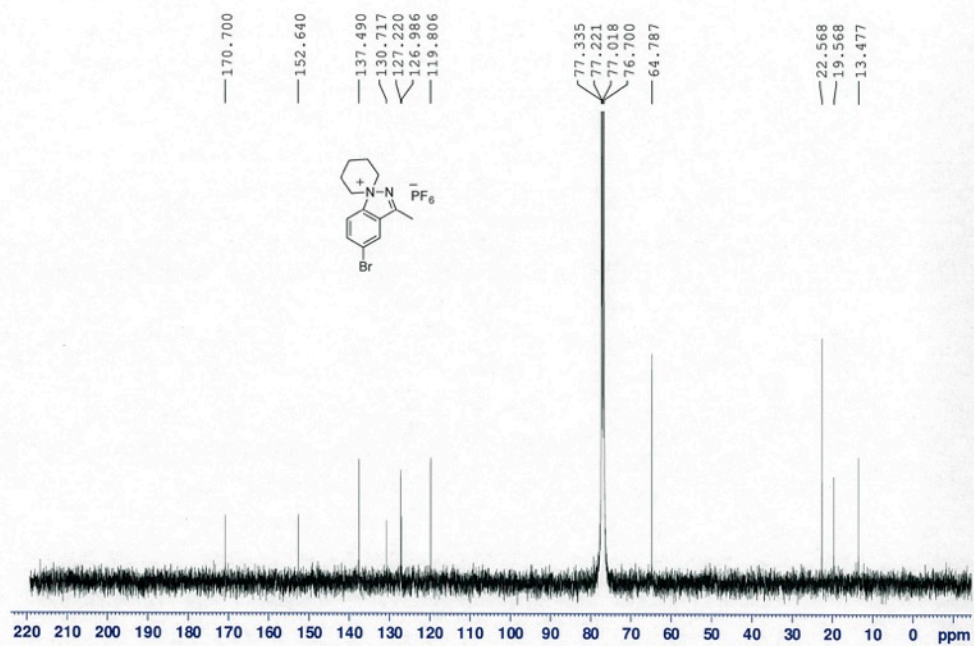

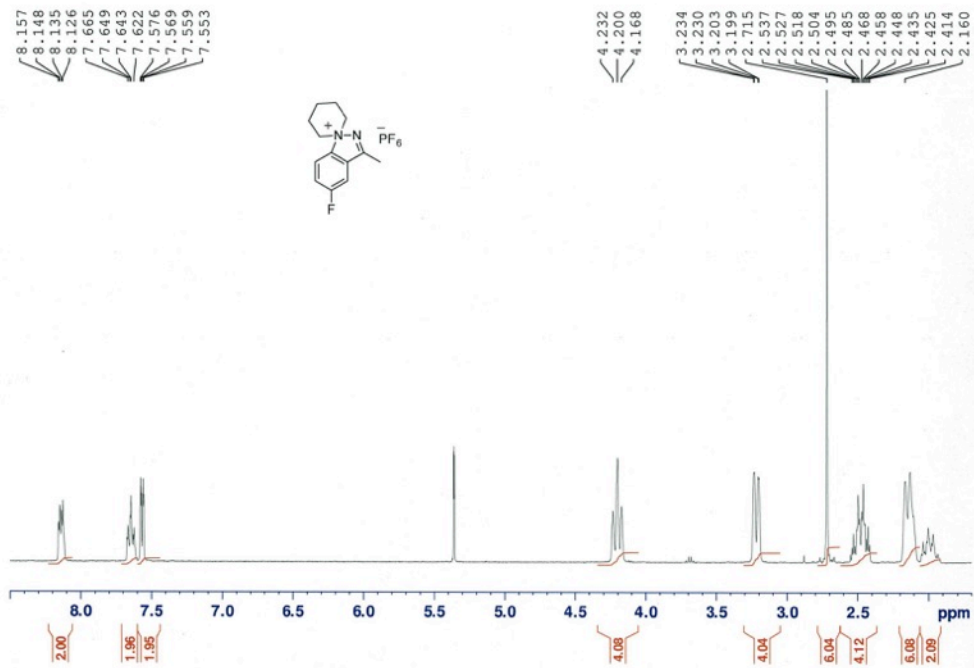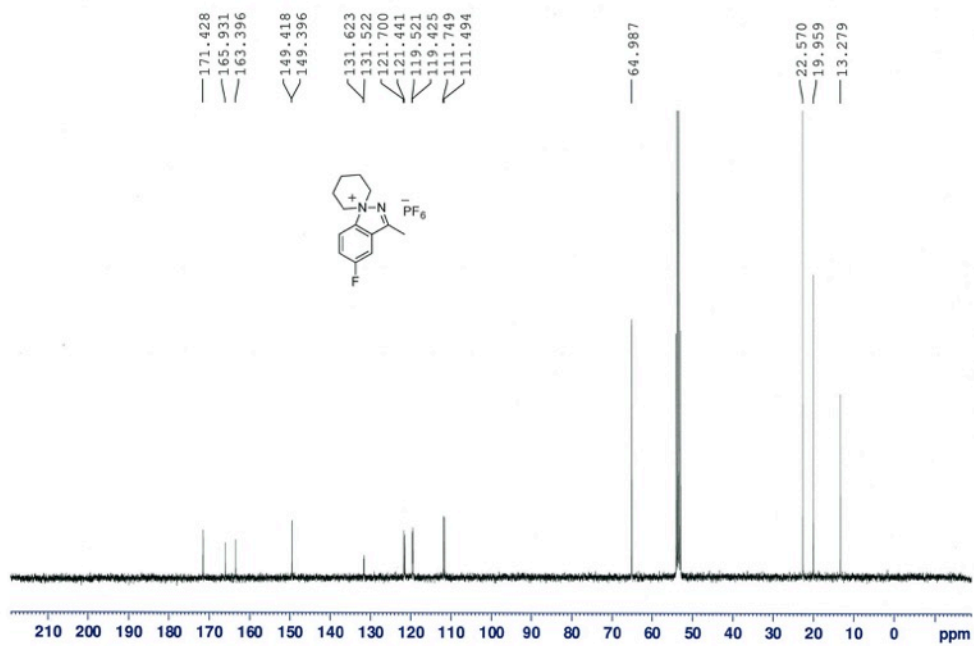

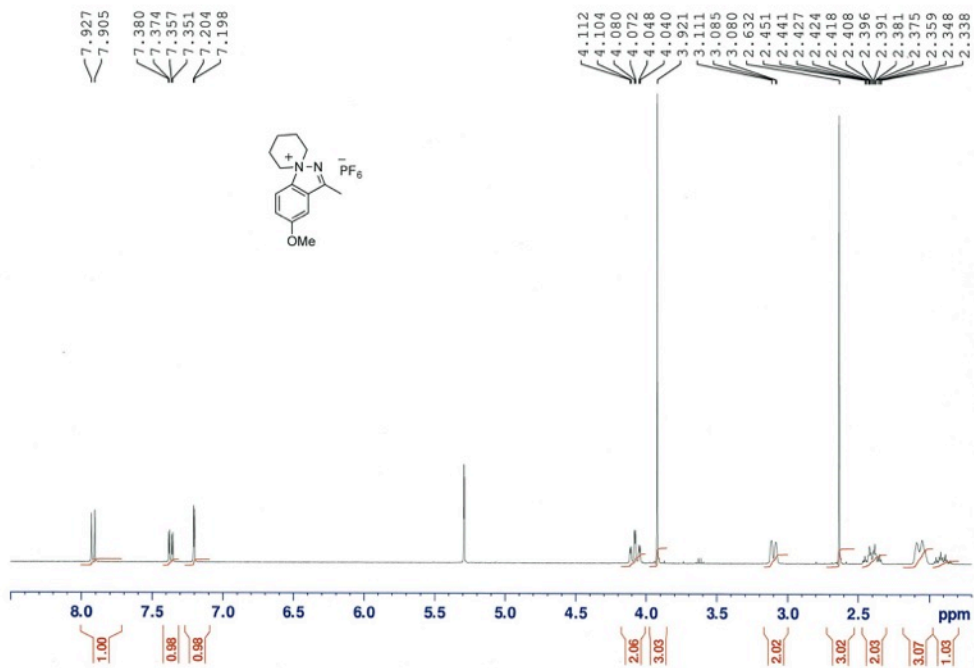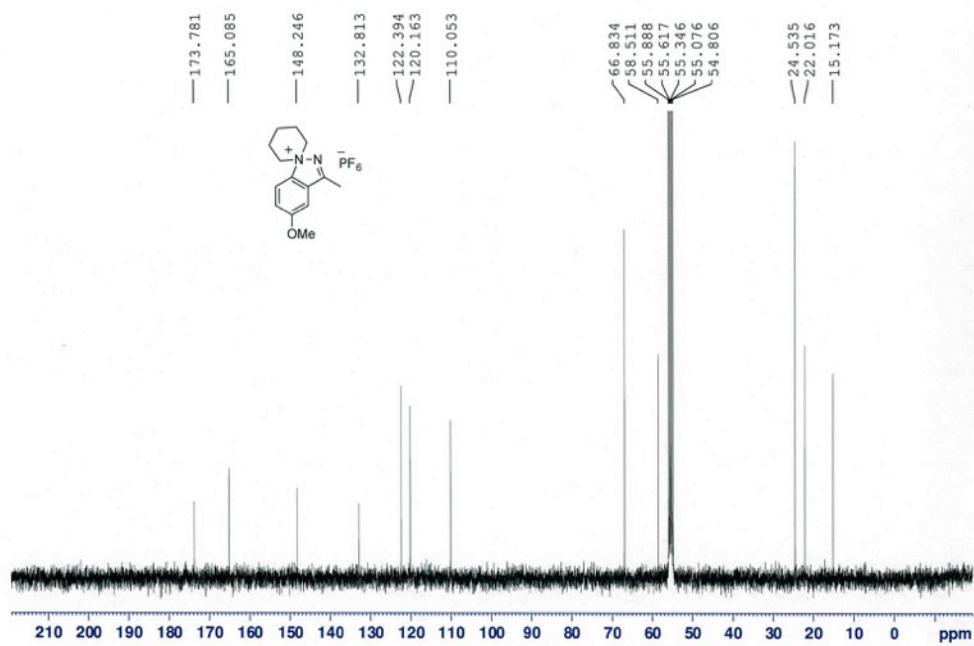

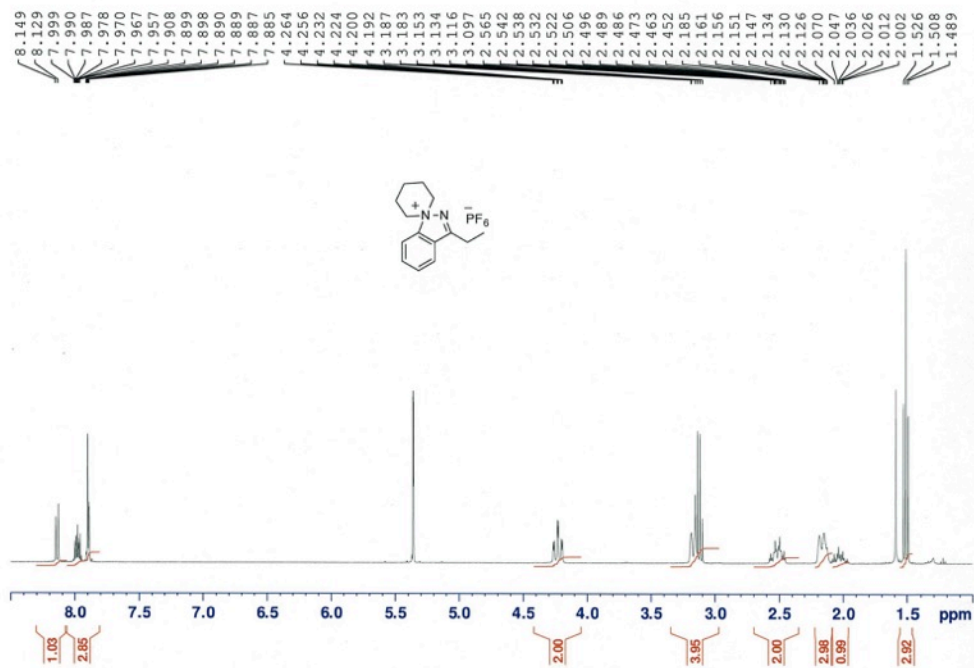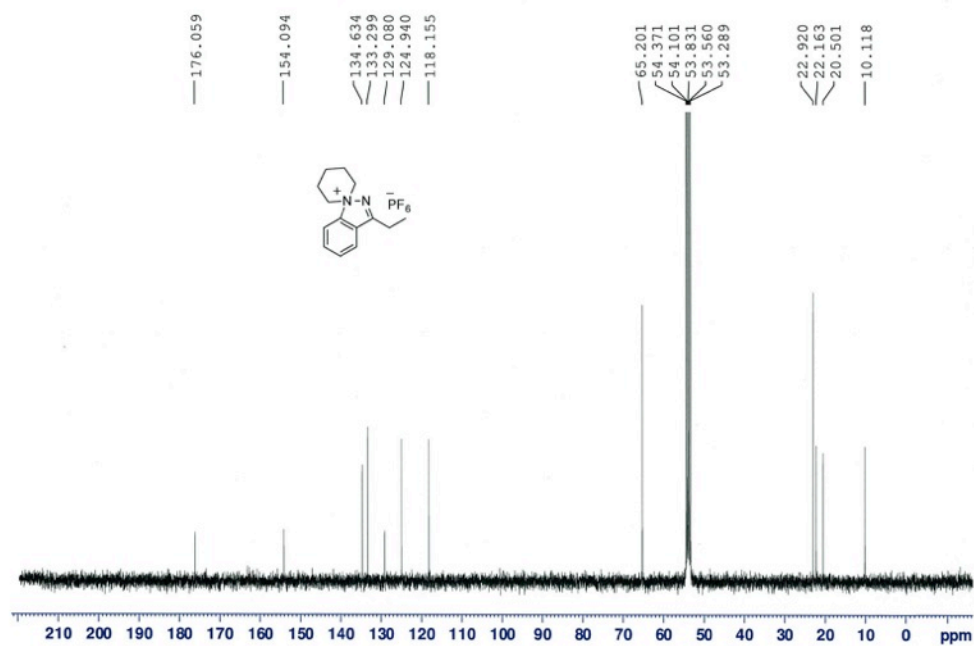

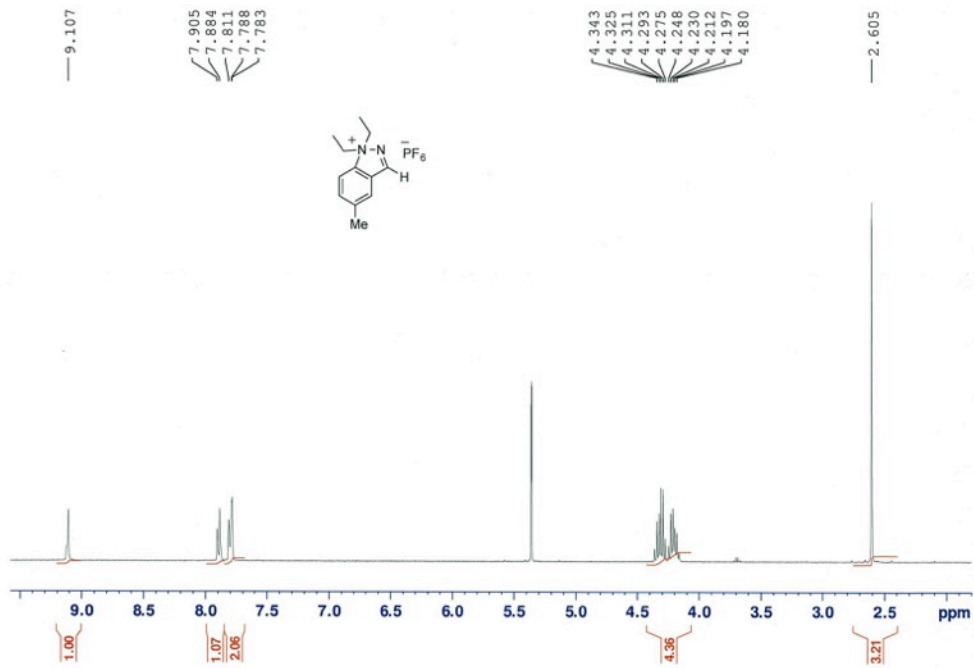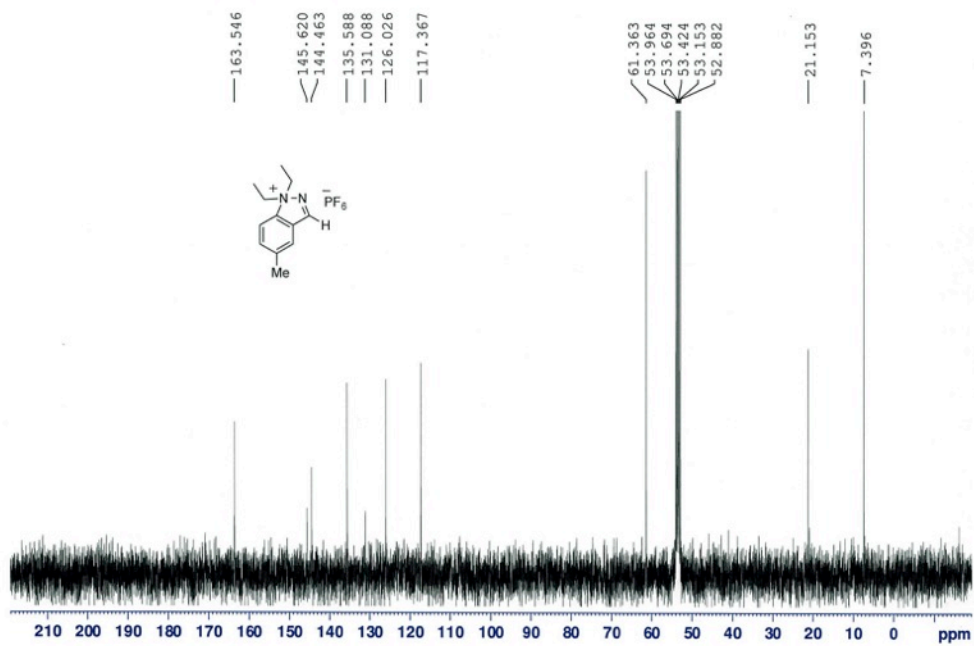



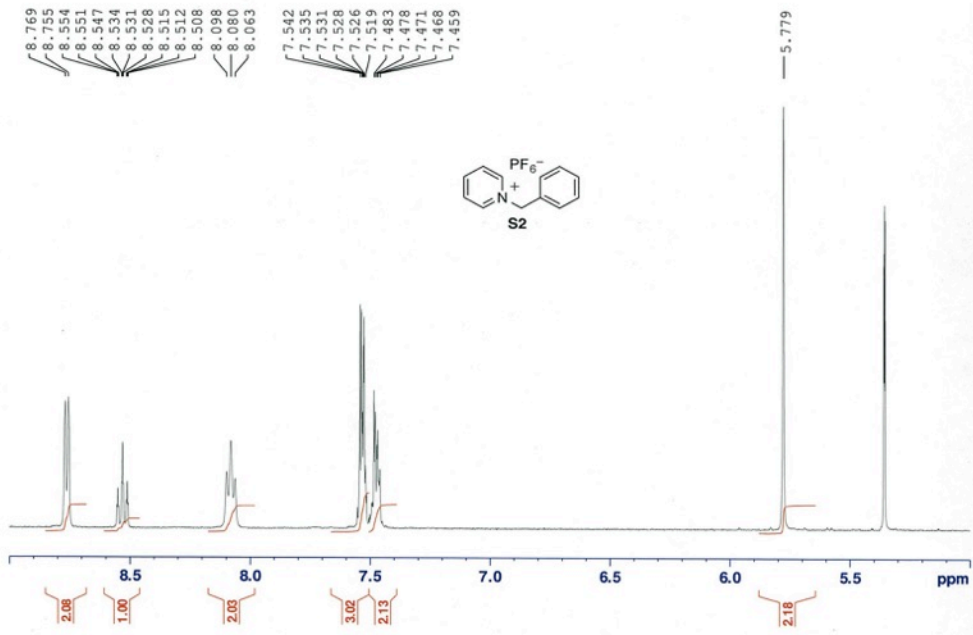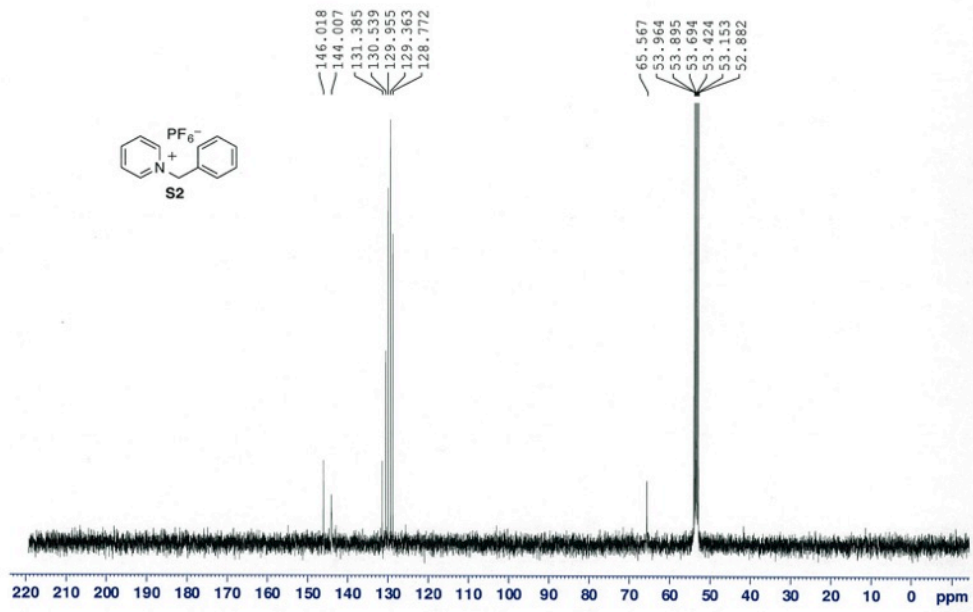



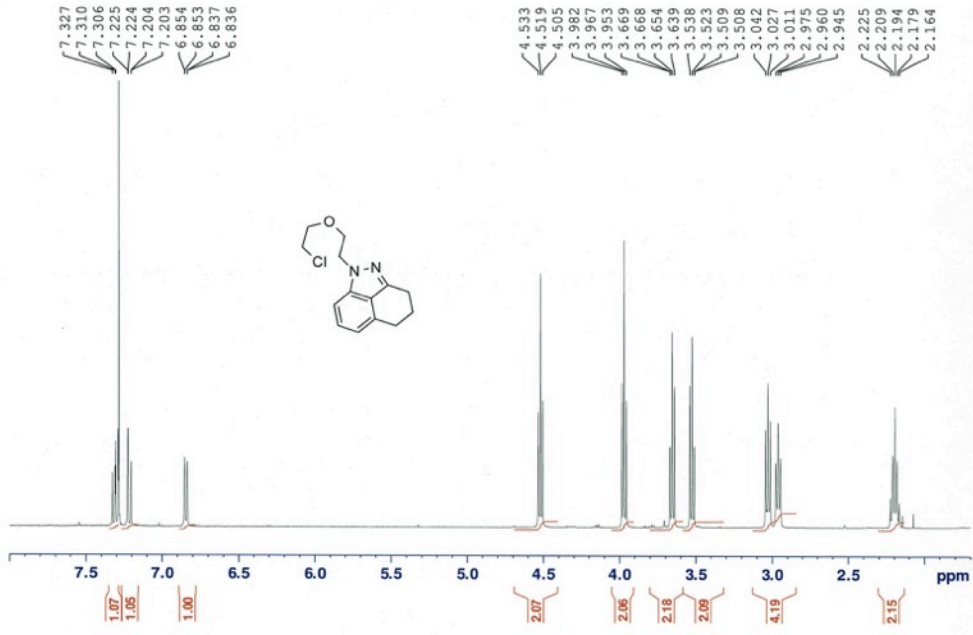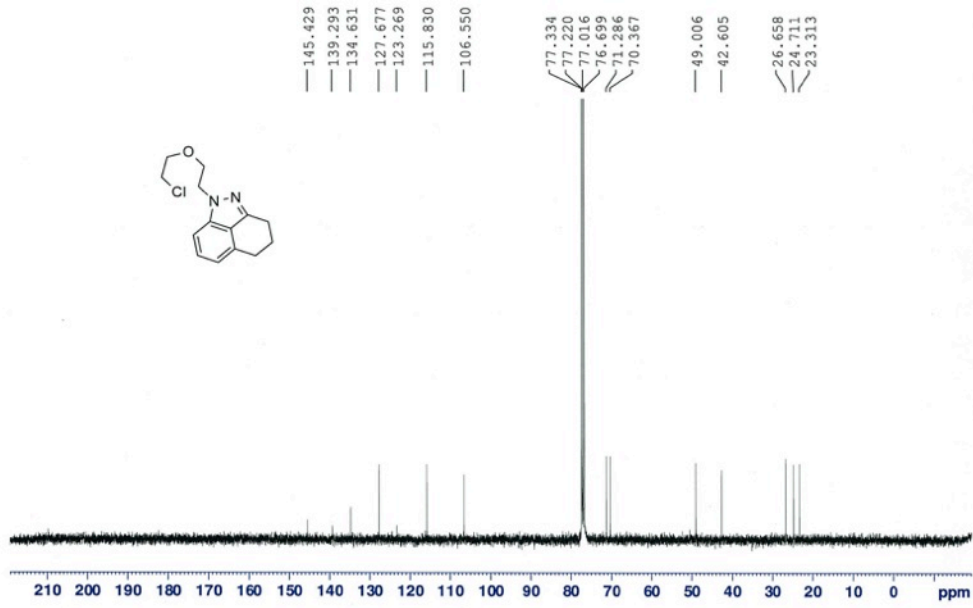

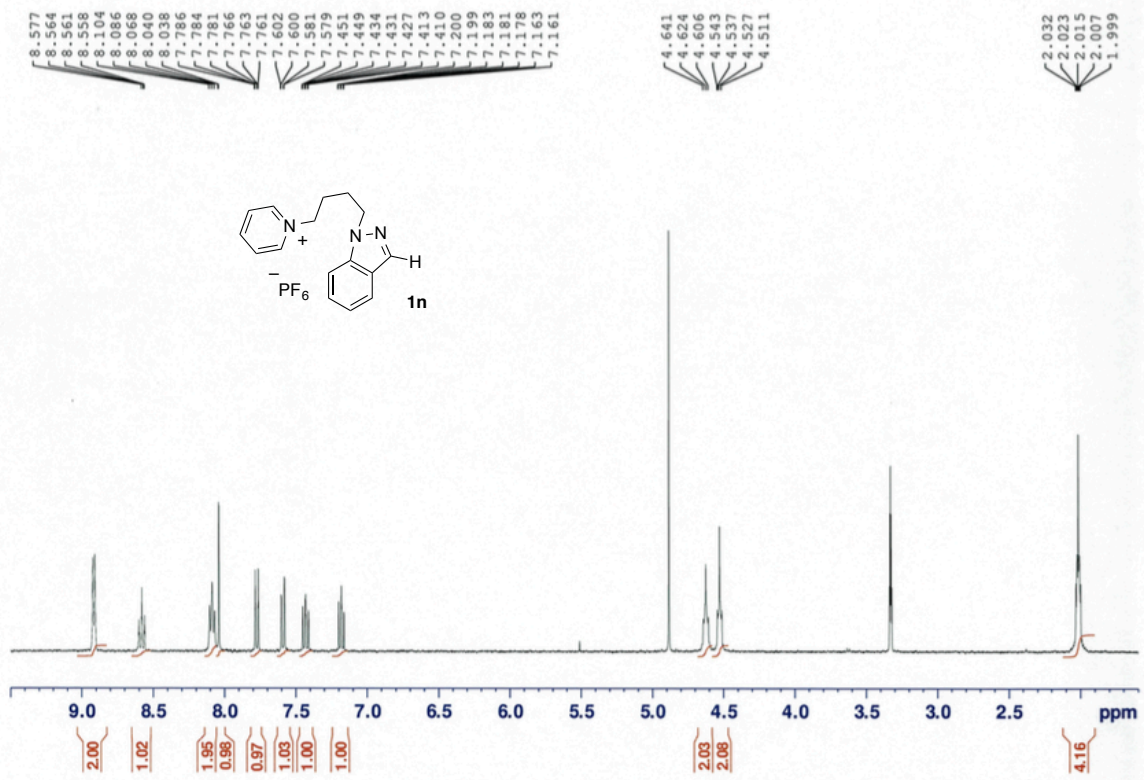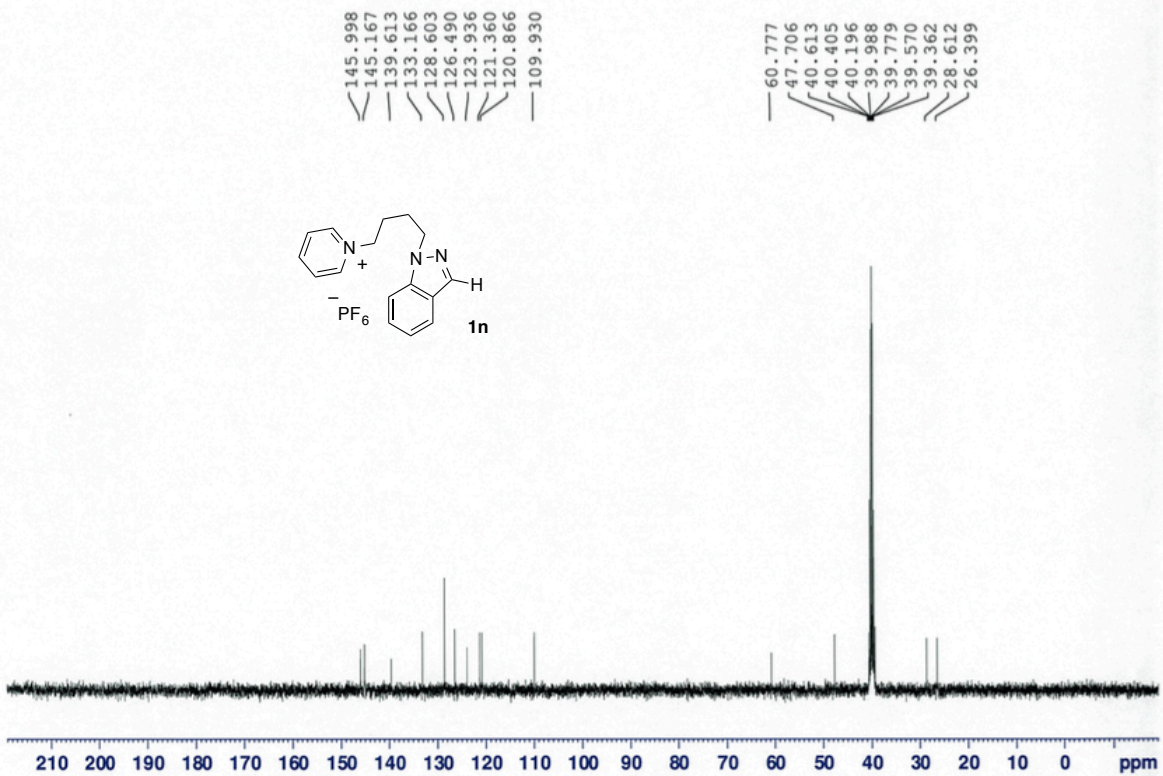

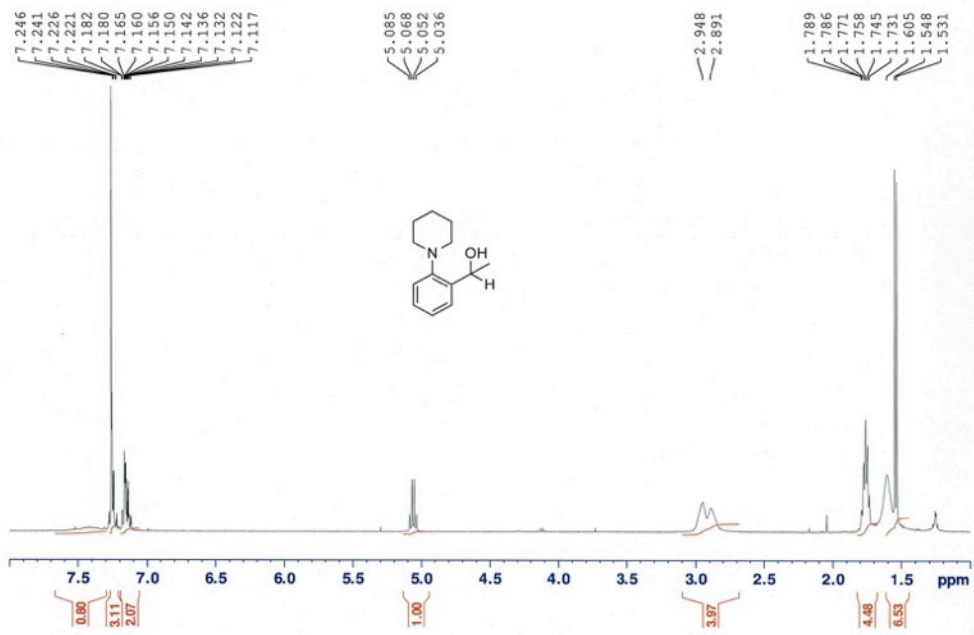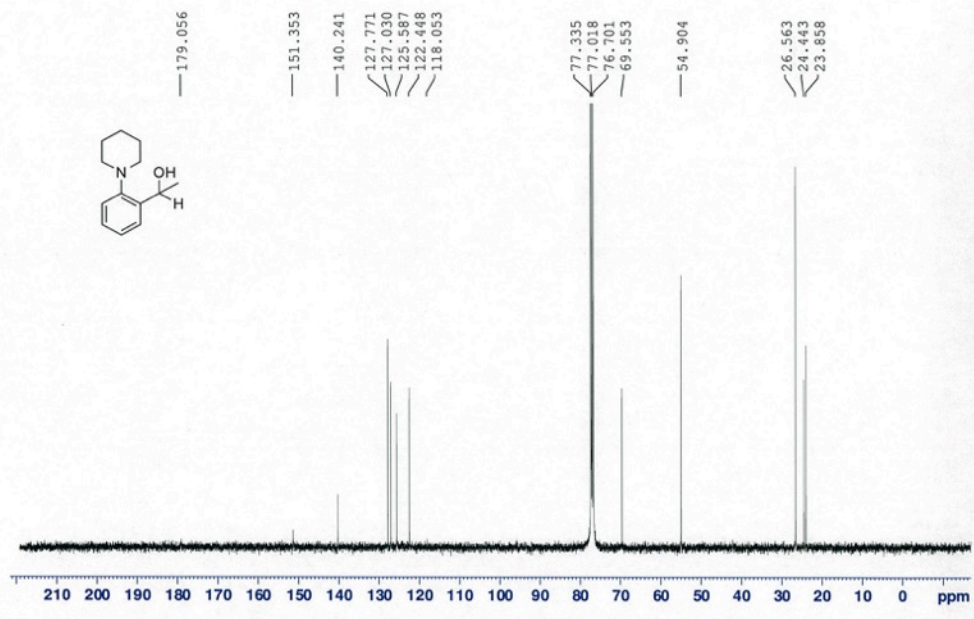

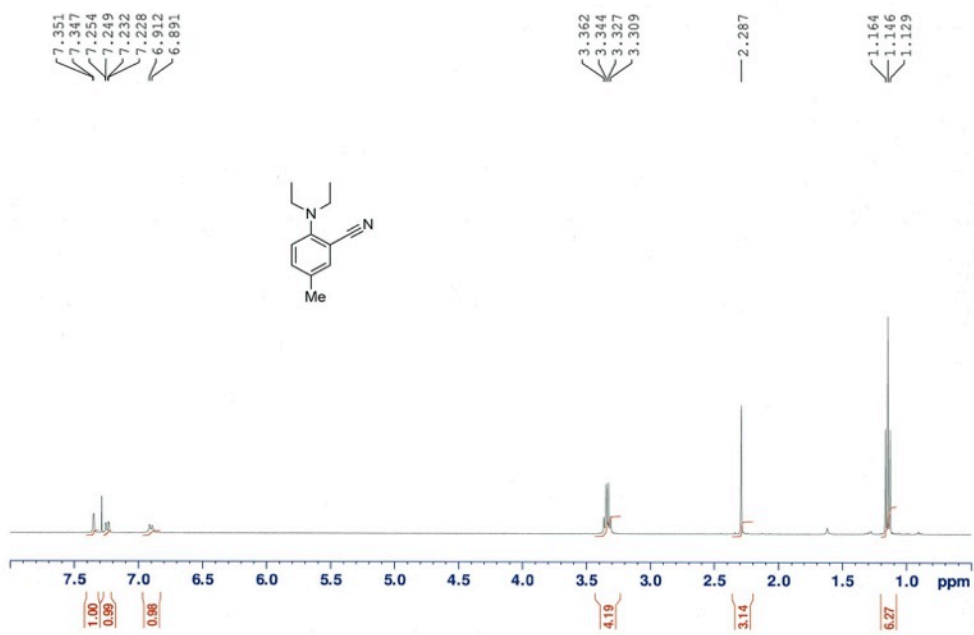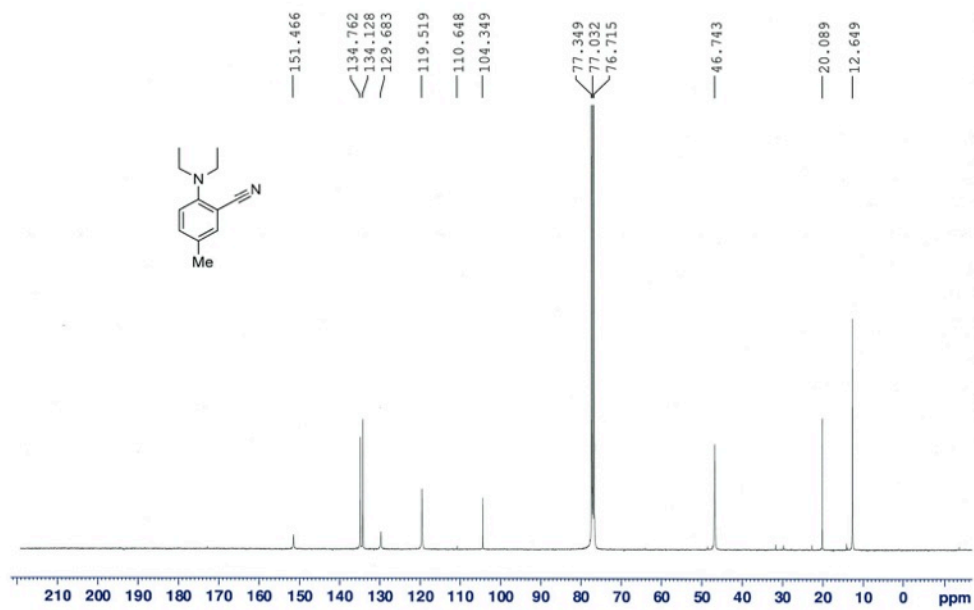

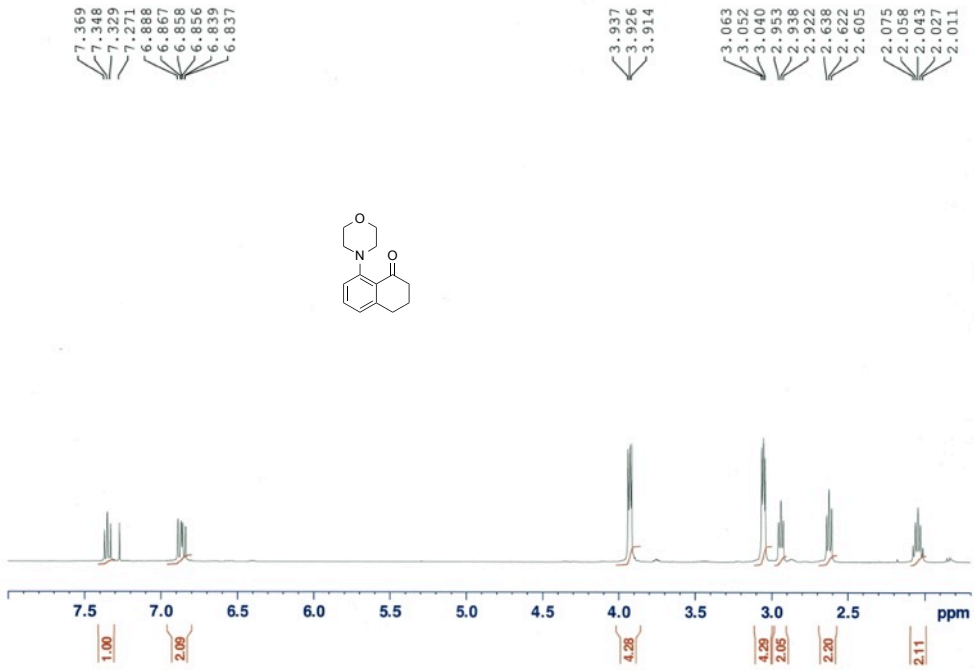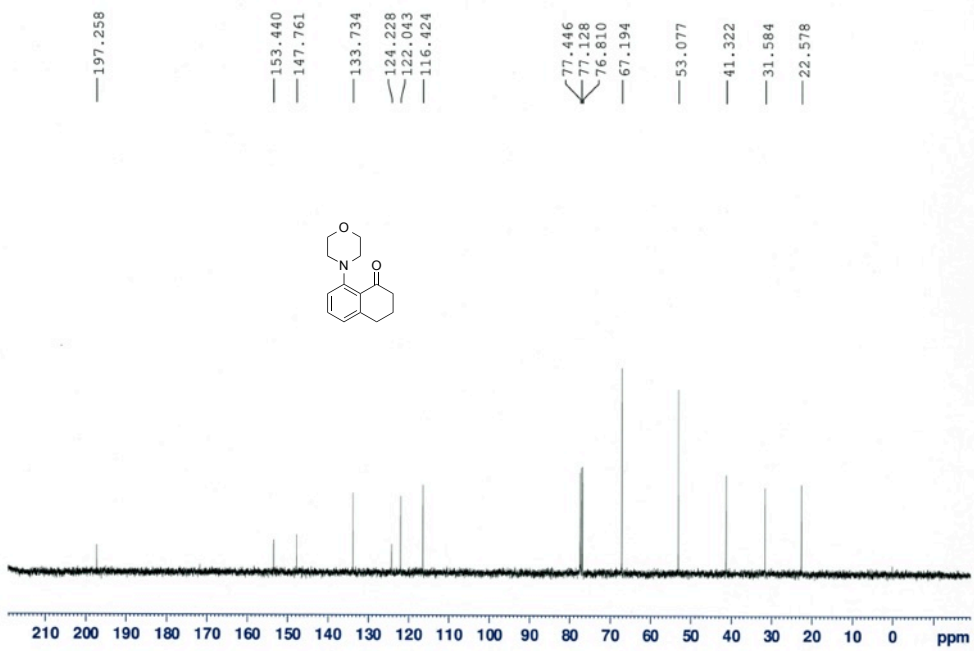

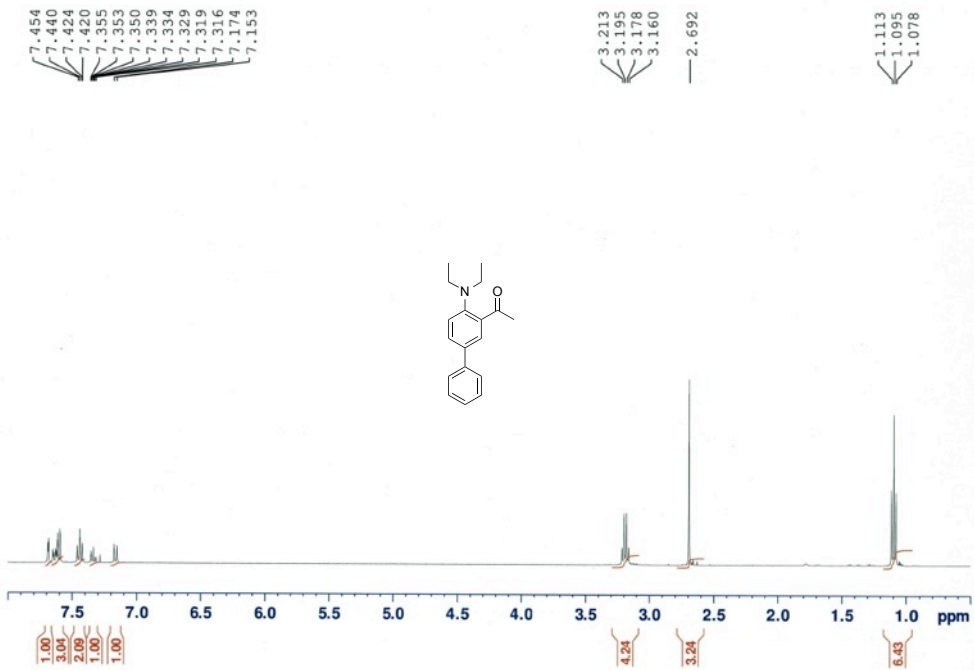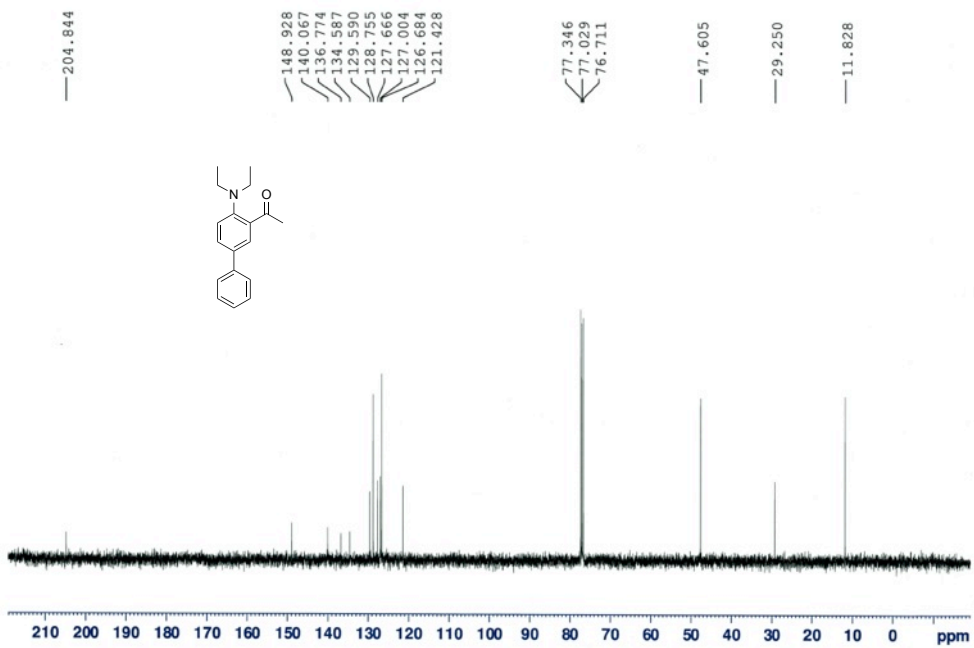



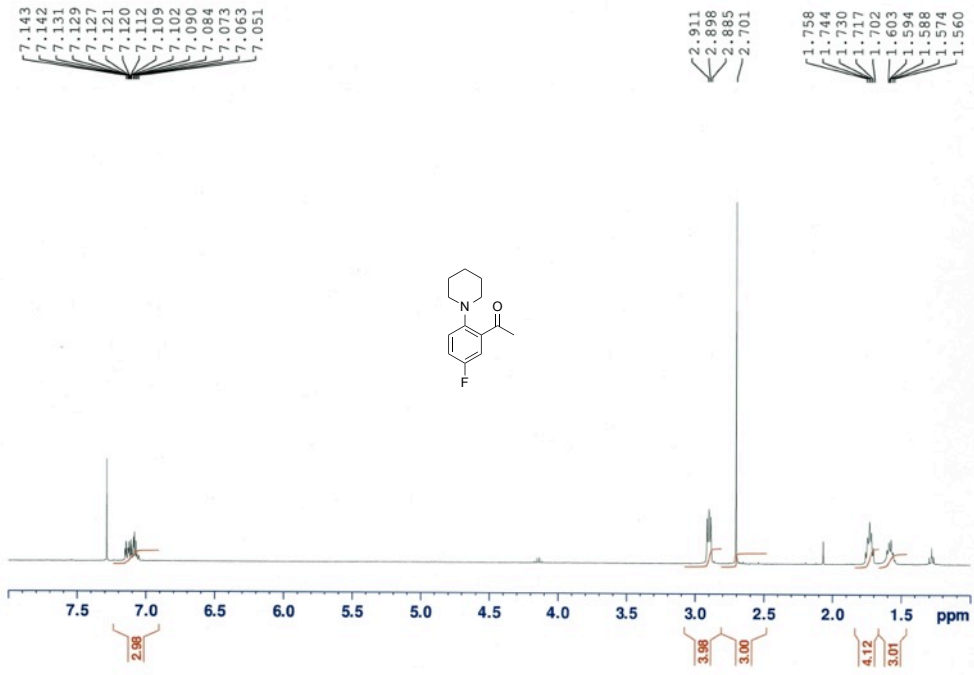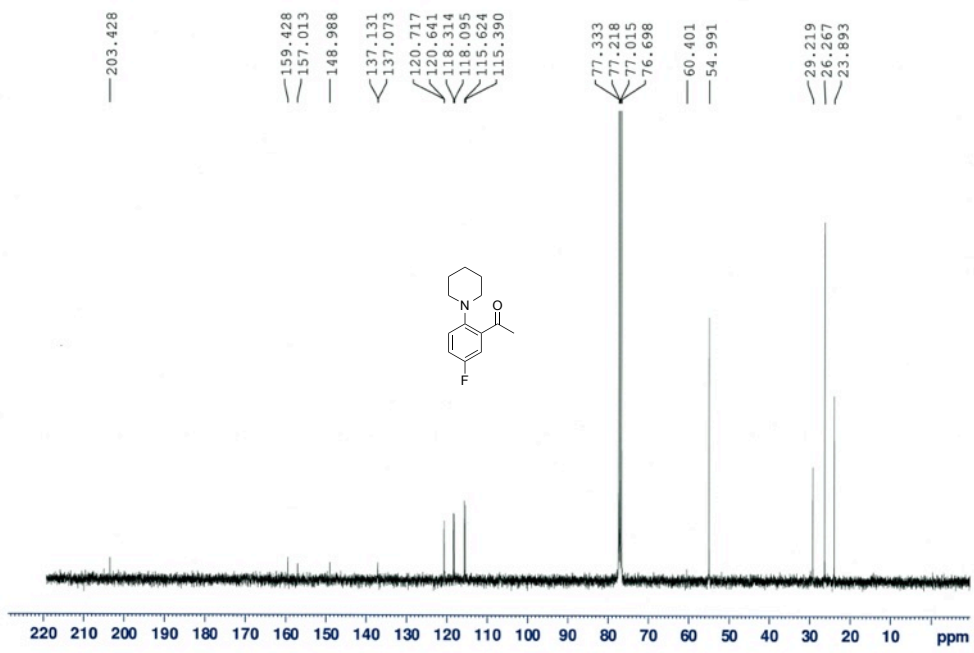

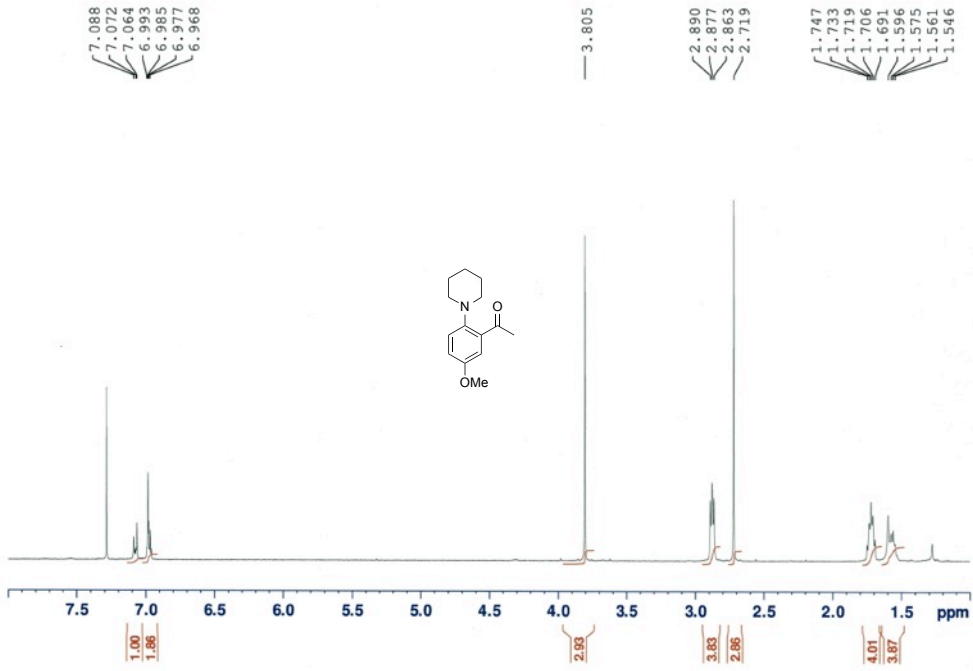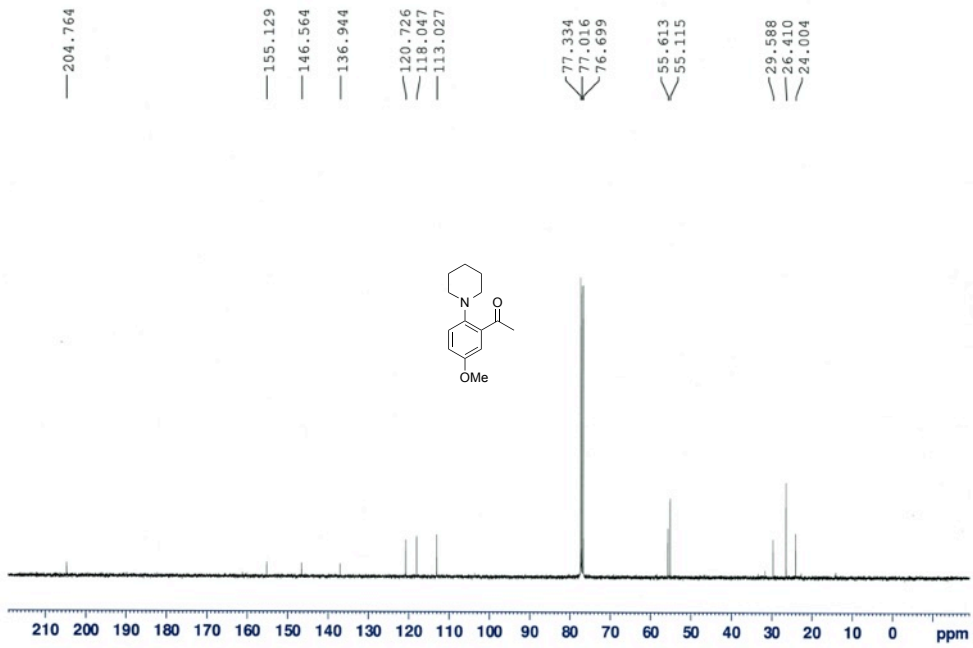



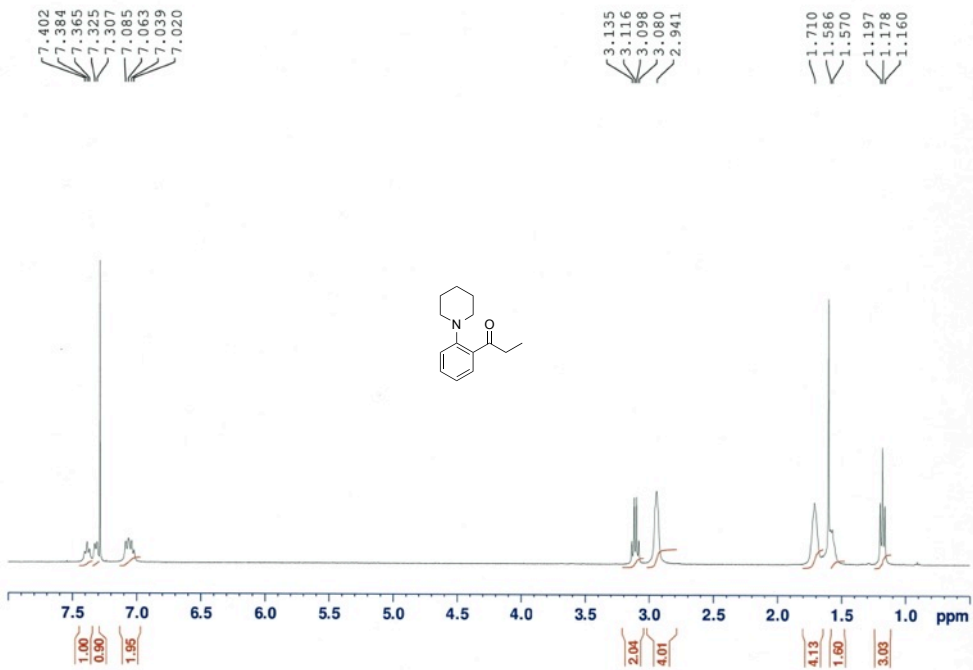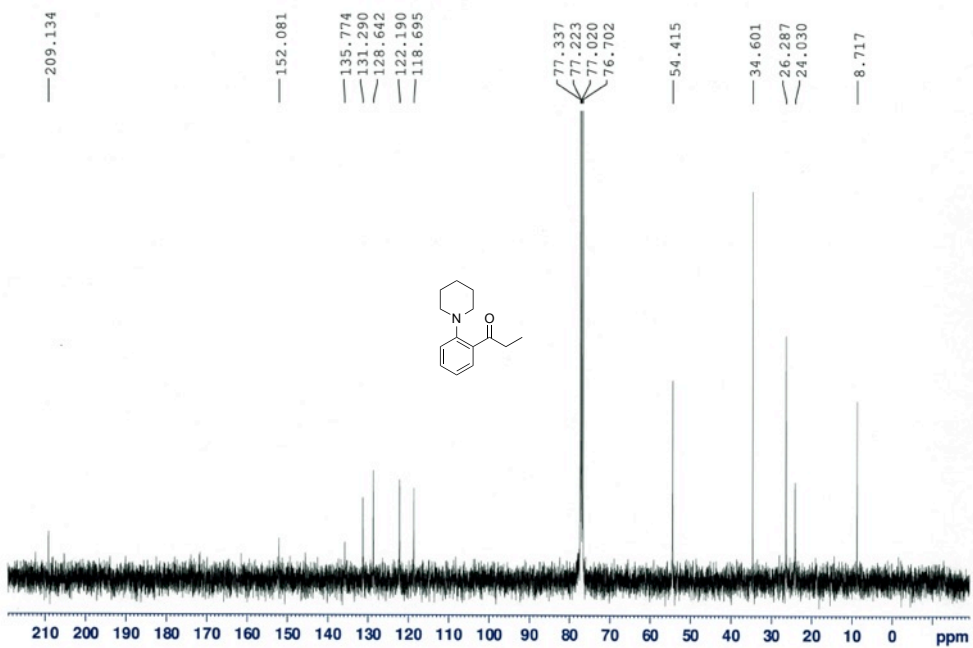

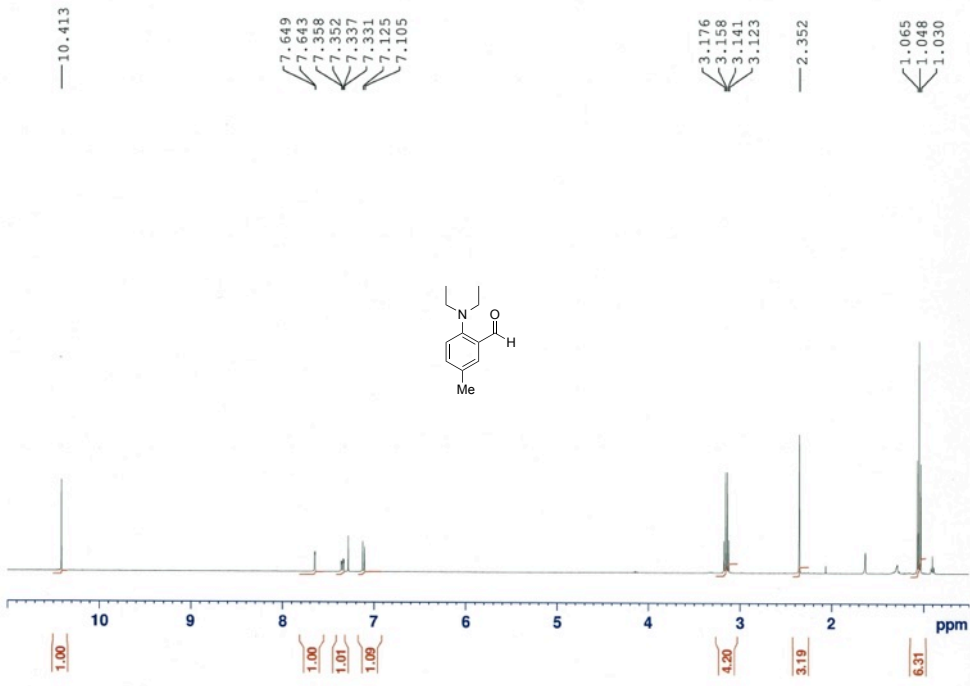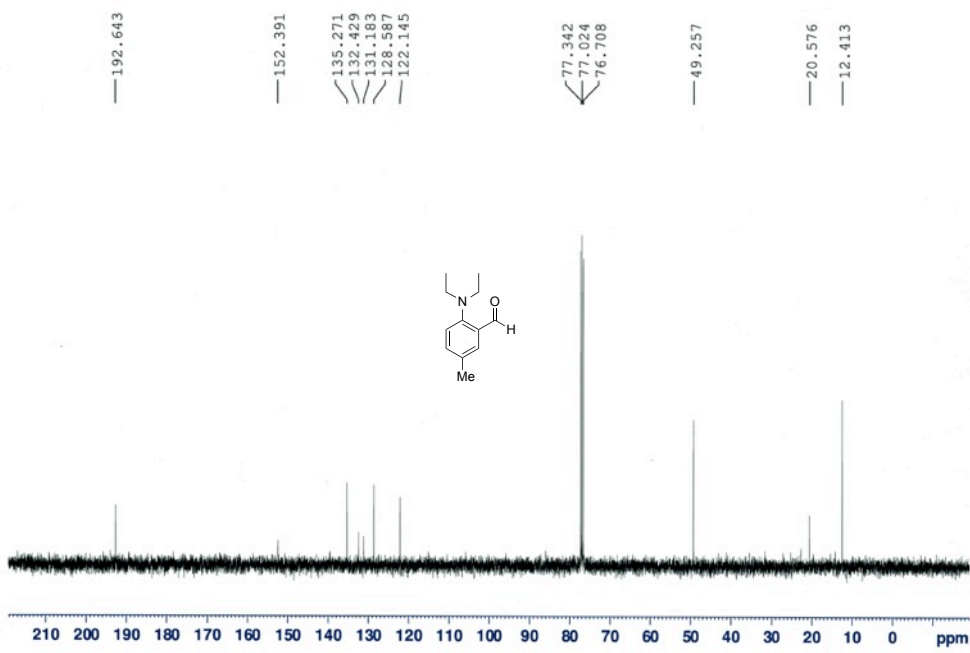

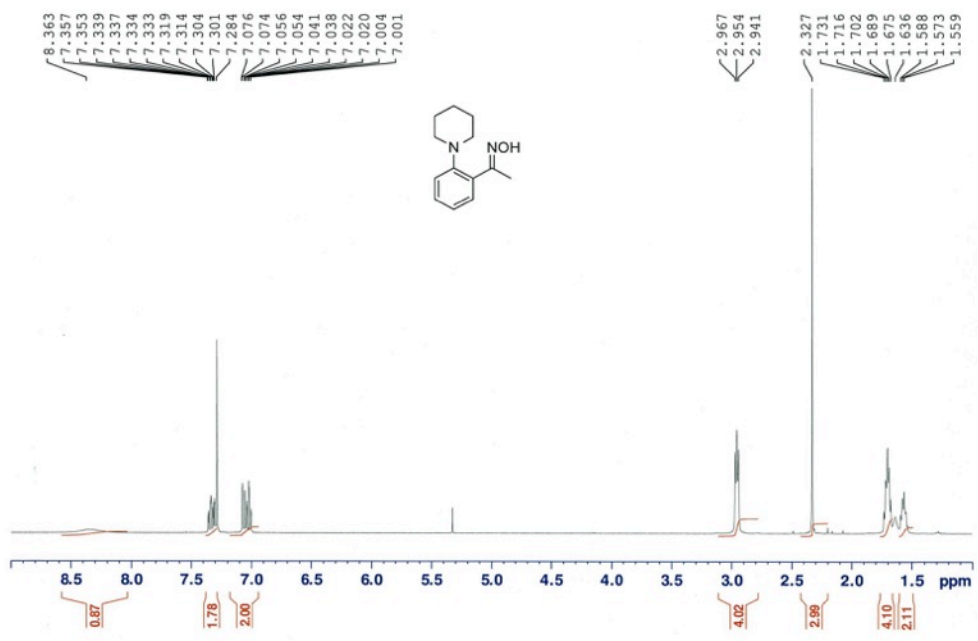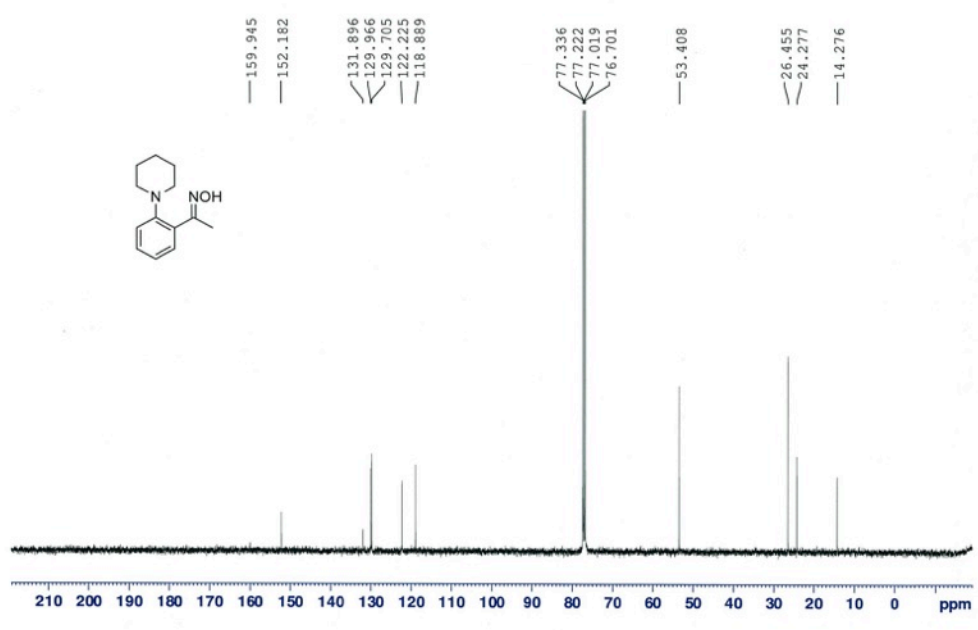

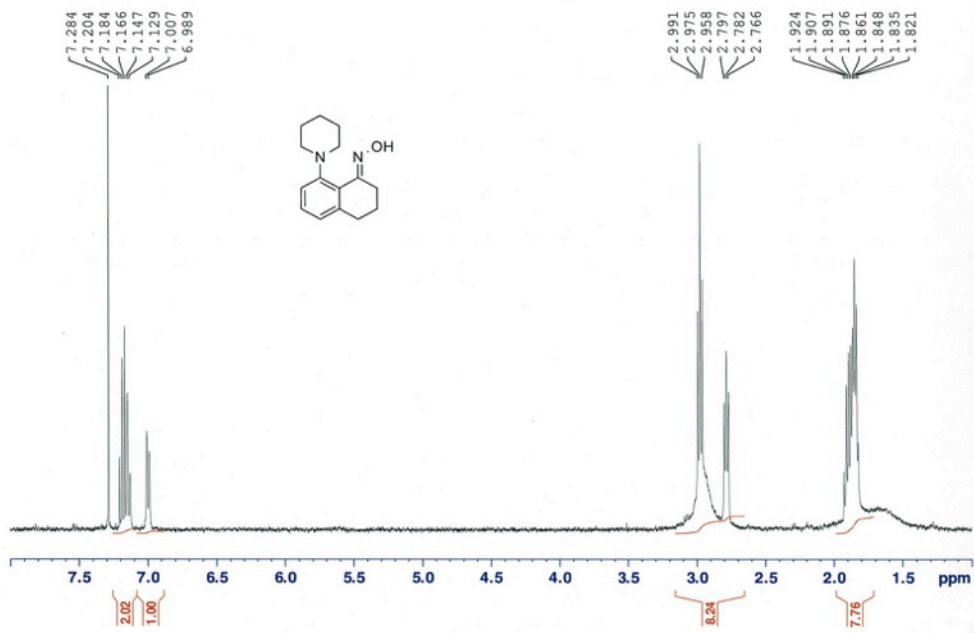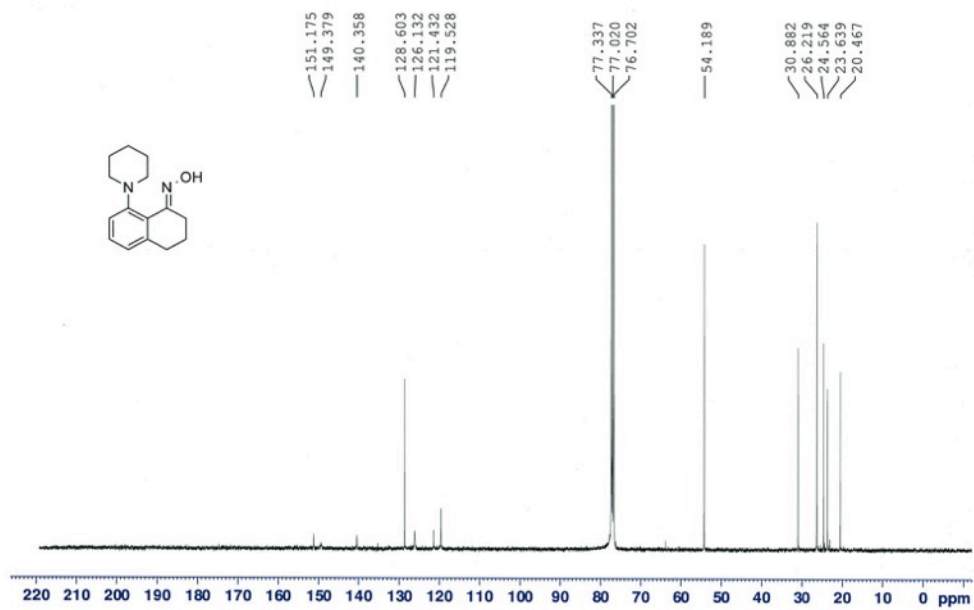

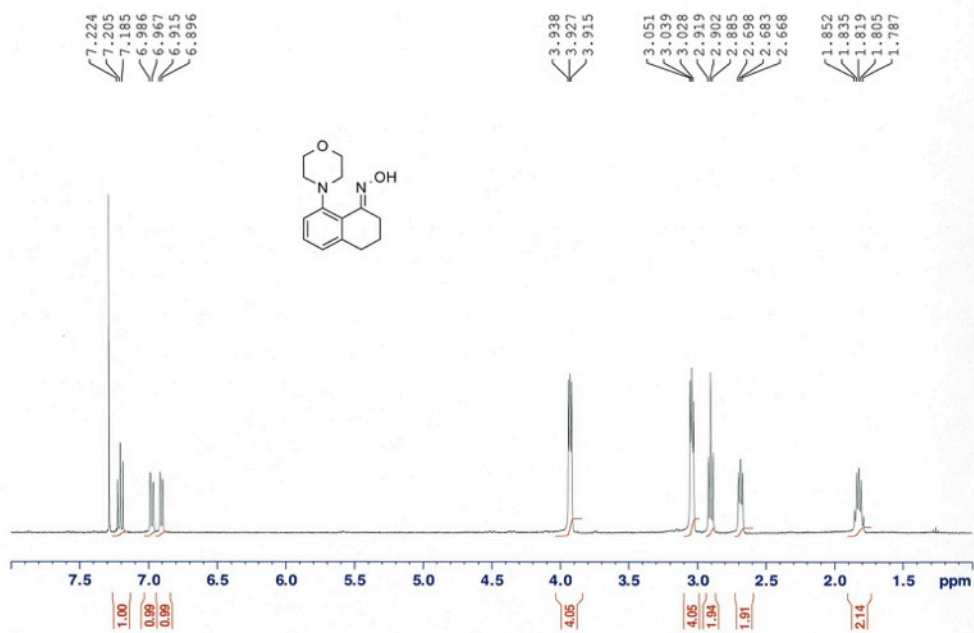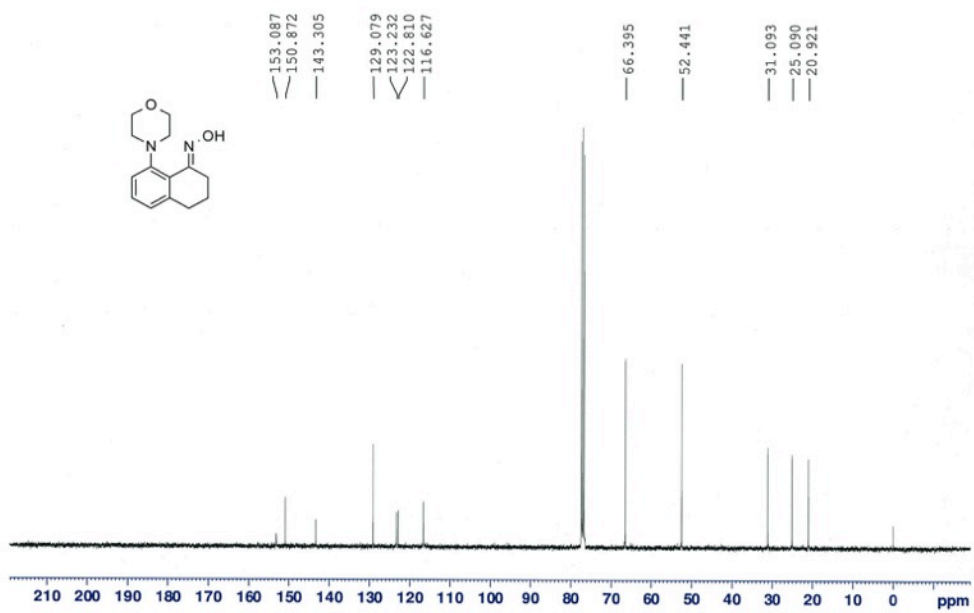

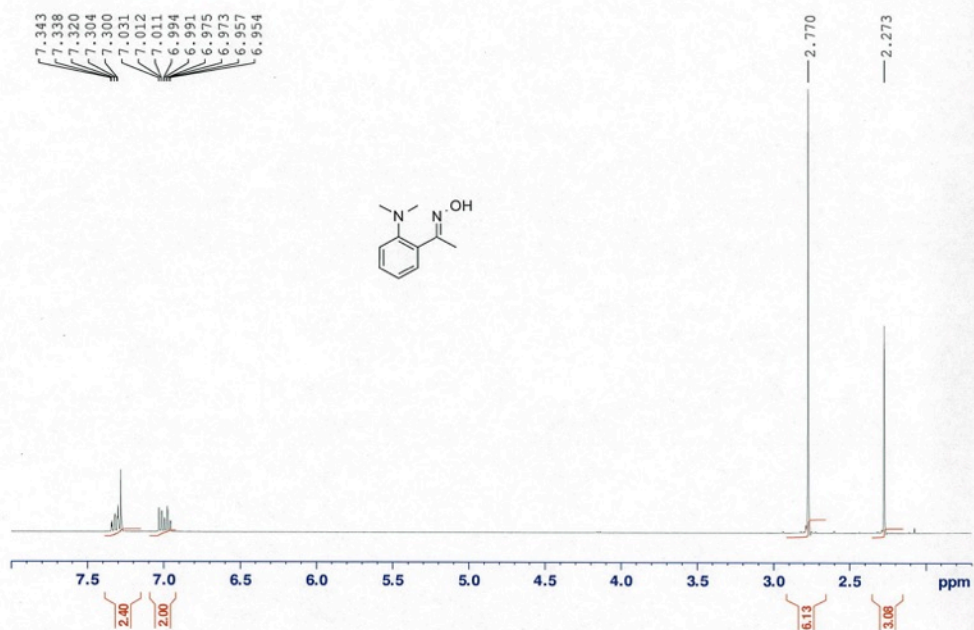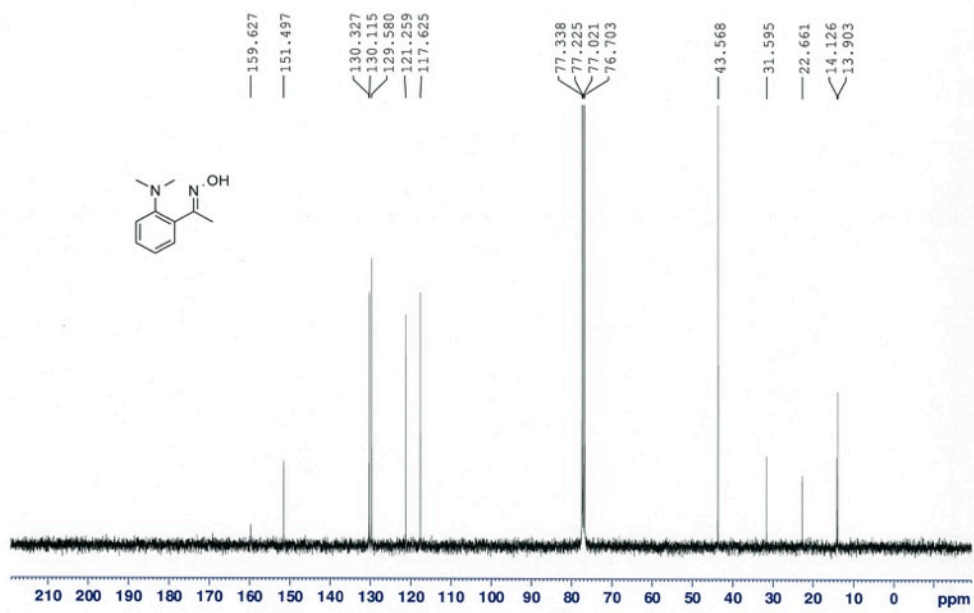

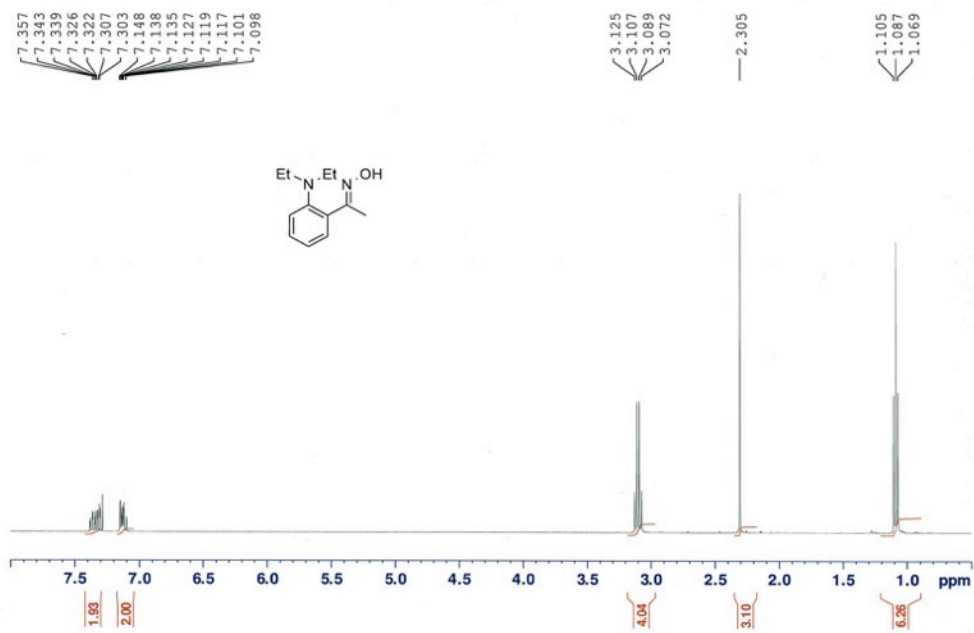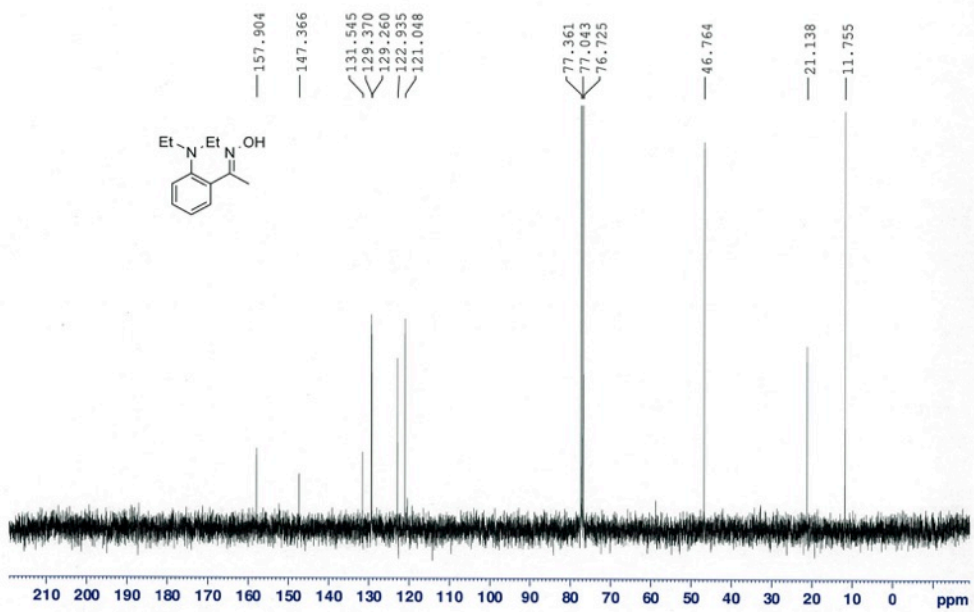





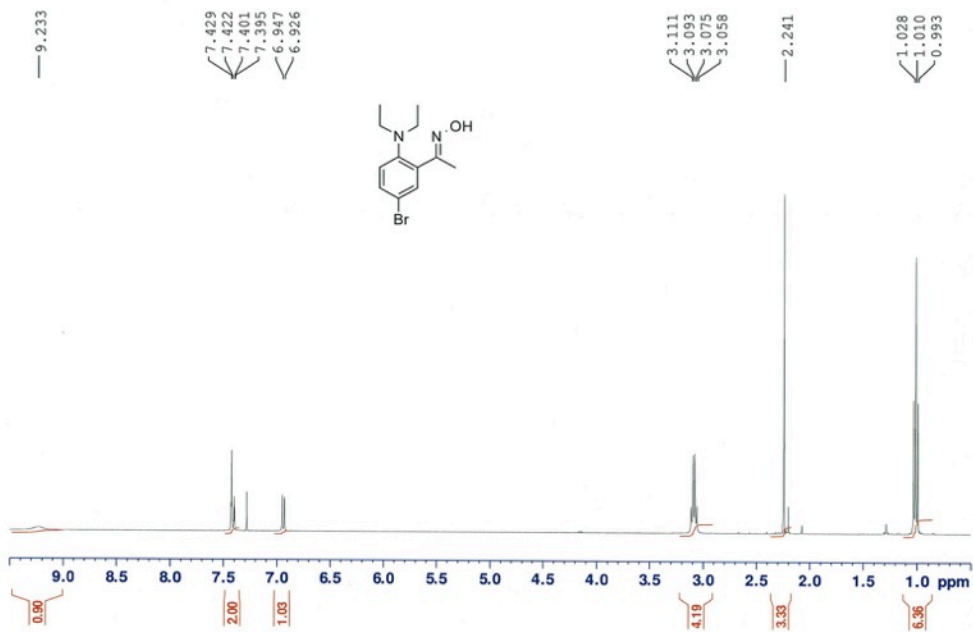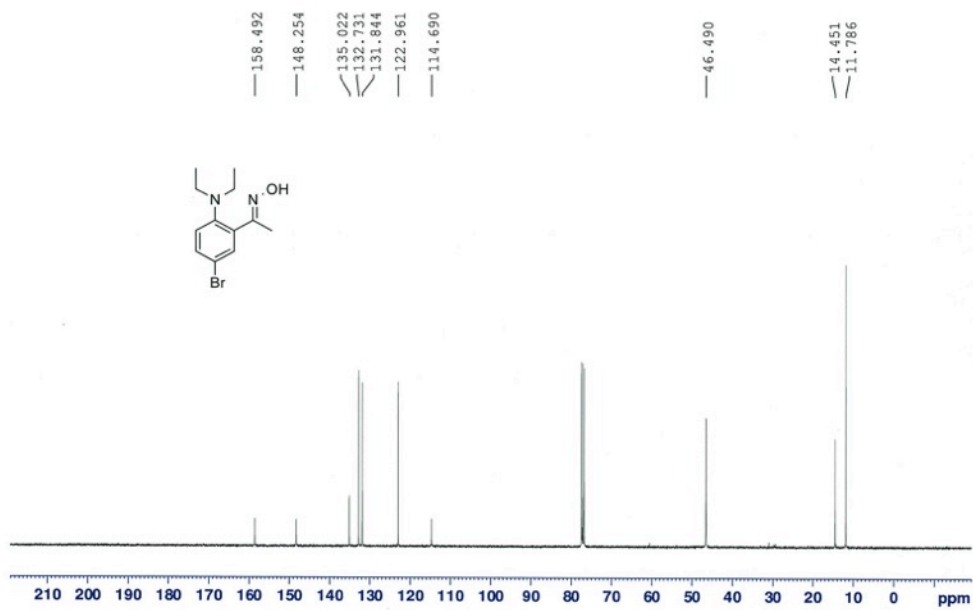

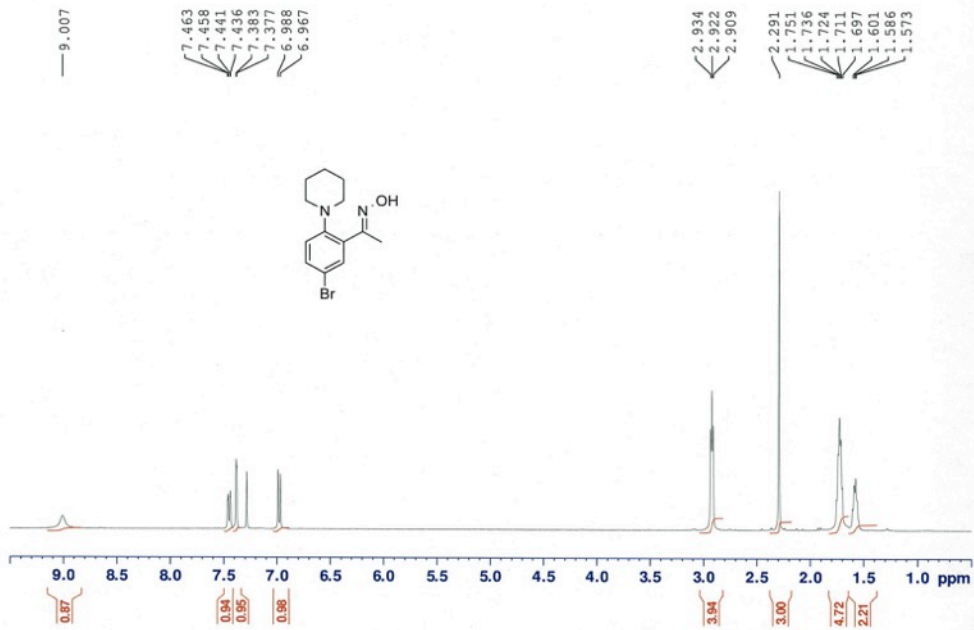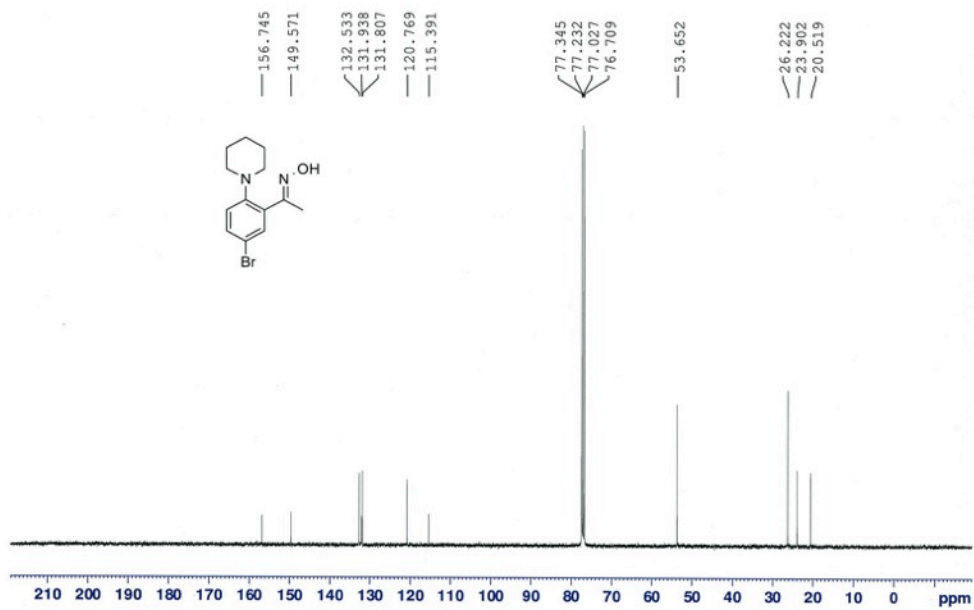

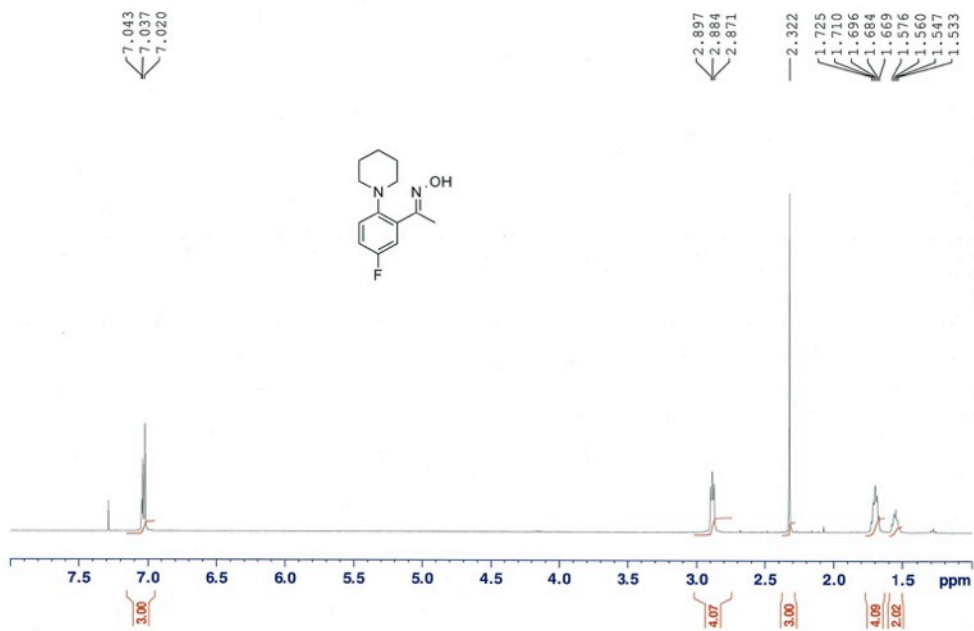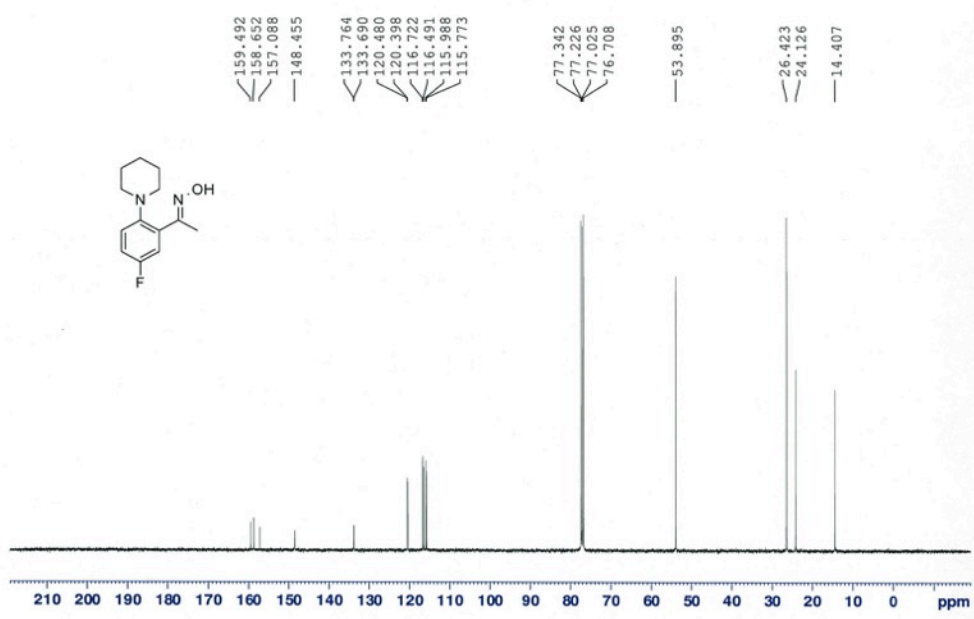

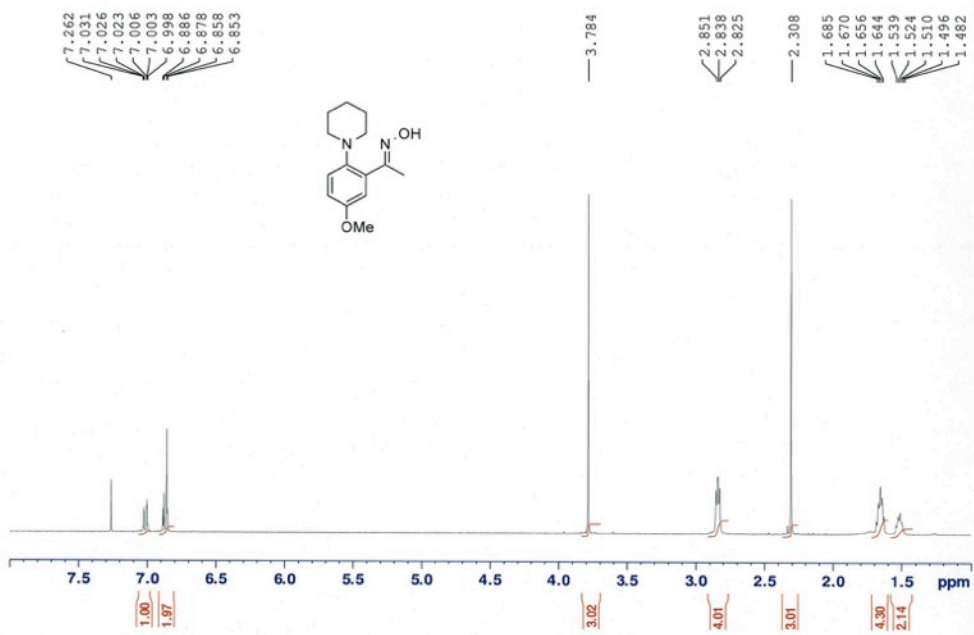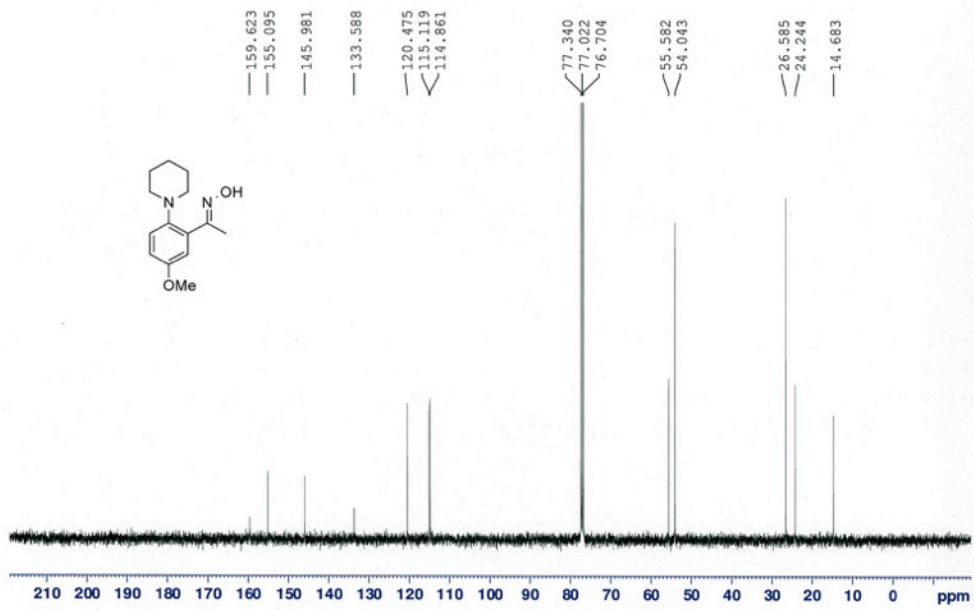

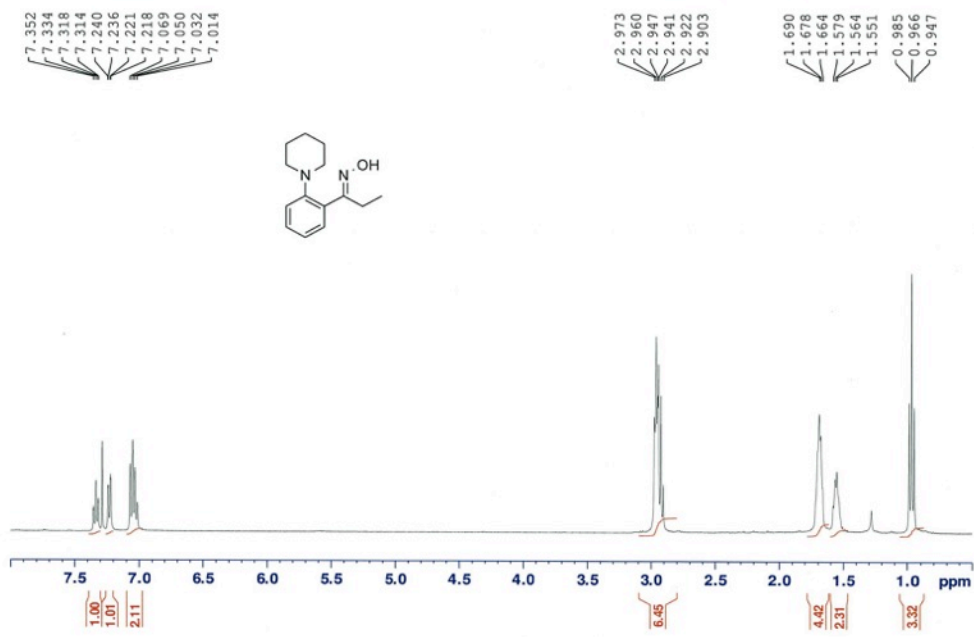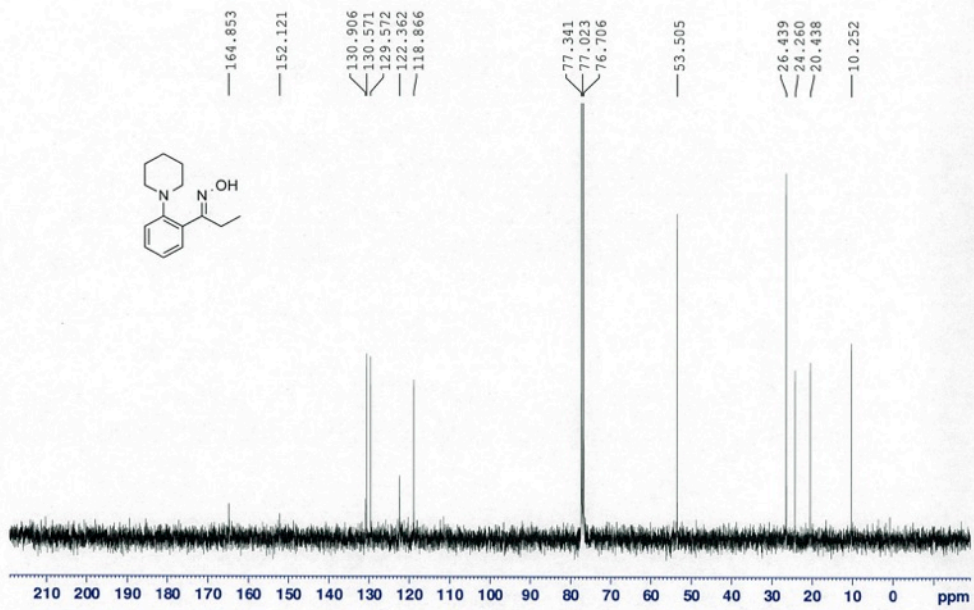

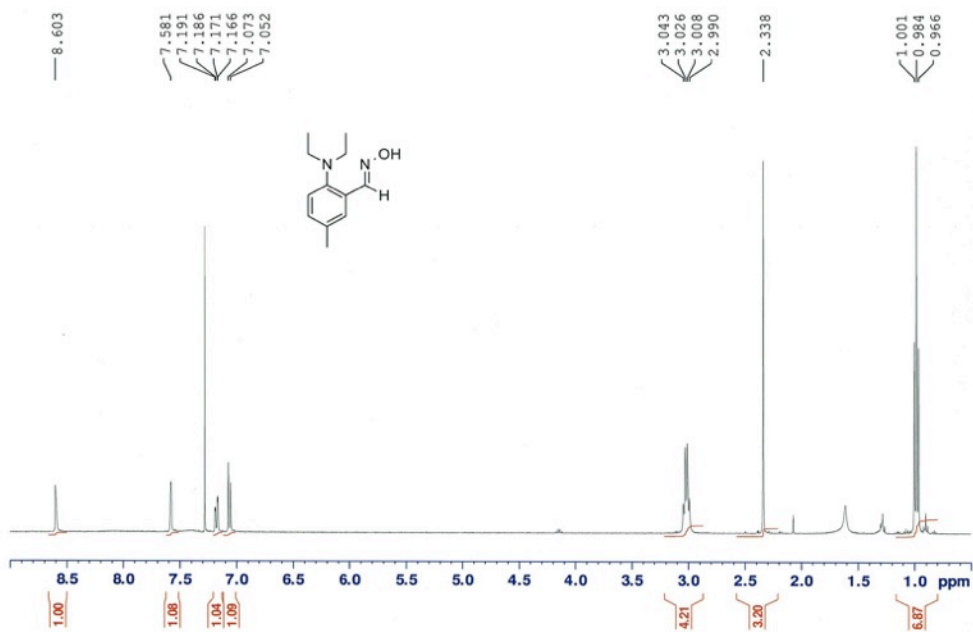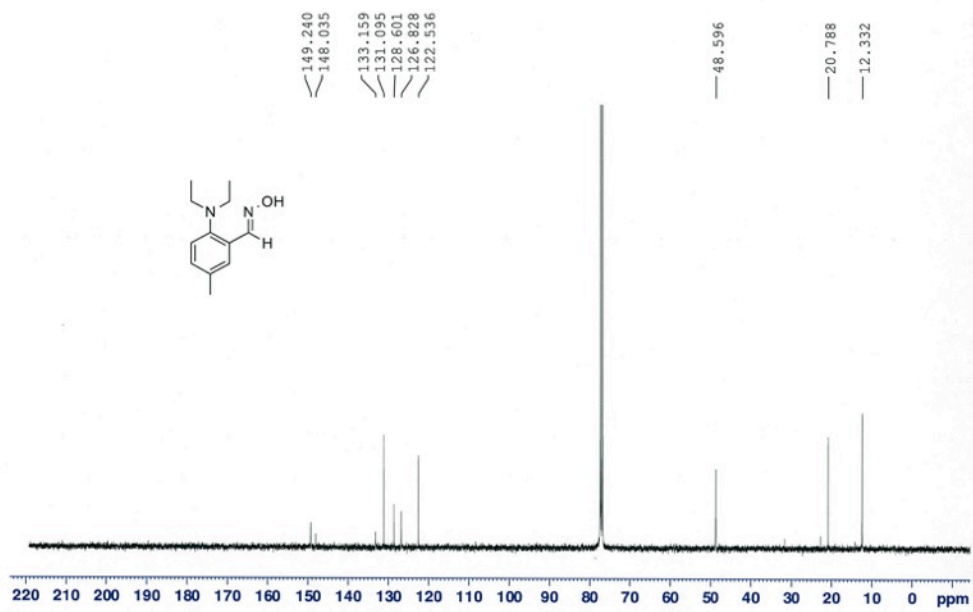

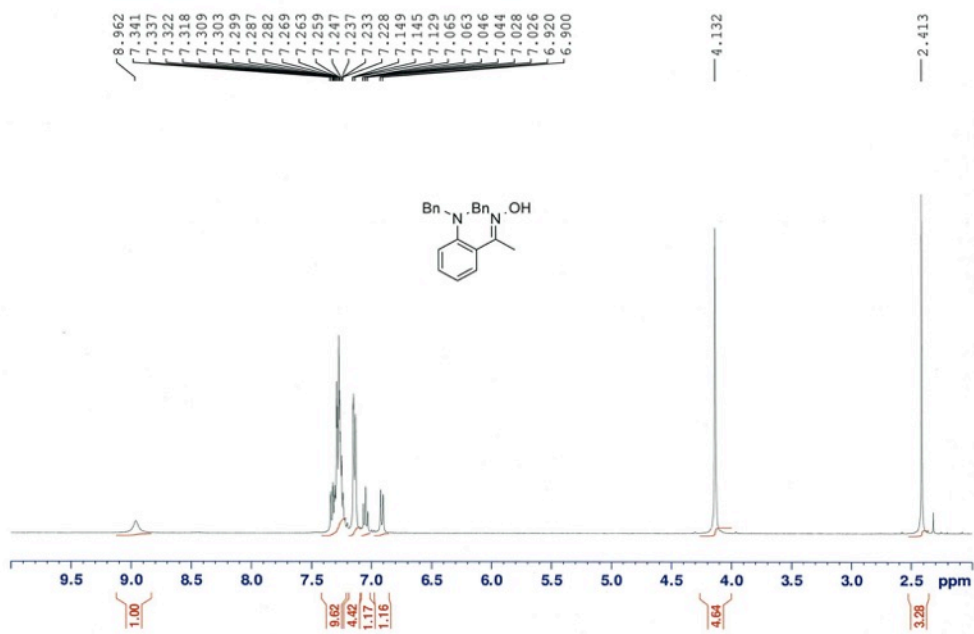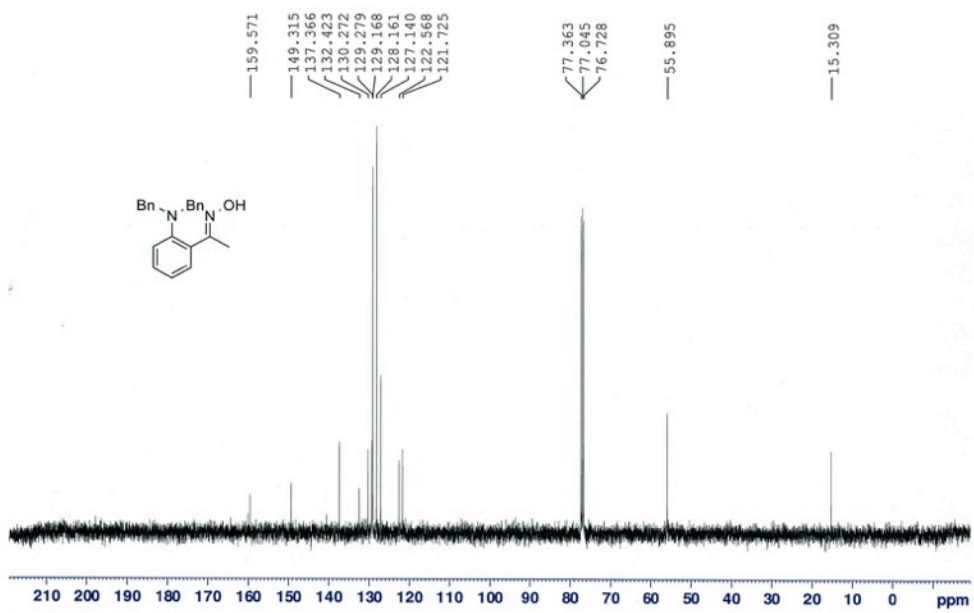

## Reference

- [S1] R. Deme, M. Schlich, Z. Mucsi, G. Karvaly, G. Tóth, P. Mátyus, *Arkivoc* **2016**, 164–196.
- [S2] W. D. Crow, H. McNab, *Aust. J. Chem.* **1979**, 32, 89–98.
- [S3] Z. Huang, Y. Yang, Q. Xiao, Y. Zhang, J. Wang, *Eur. J. Org. Chem.* **2012**, 6586–6593.
- [S4] W. T. Wei, X. J. Dong, S. Z. Nie, Y. Y. Chen, X. J. Zhang, M. Yan, *Org. Lett.* **2013**, 15, 6018–6021.
- [S5] C. P. A. Kunka, *Can. J. Chem.* **1990**, 68, 575–580.
- [S6] Sheldrick, G. M. (1996). *SADABS*. University of Göttingen, Germany.
- [S7] Sheldrick, G. M. *Acta. Cryst.* **2015**, A71, 3–8.
- [S8] Sheldrick, G. M. *Acta. Cryst.* **2015**, C71, 3–8.
- [S9] Gaussian 09, Revision E.01, M. J. Frisch, G. W. Trucks, H. B. Schlegel, G. E. Scuseria, M. A. Robb, J. R. Cheeseman, G. Scalmani, V. Barone, G. A. Petersson, H. Nakatsuji, X. Li, M. Caricato, A. Marenich, J. Bloino, B. G. Janesko, R. Gomperts, B. Mennucci, H. P. Hratchian, J. V. Ortiz, A. F. Izmaylov, J. L. Sonnenberg, D. Williams-Young, F. Ding, F. Lipparini, F. Egidi, J. Goings, B. Peng, A. Petrone, T. Henderson, D. Ranasinghe, V. G. Zakrzewski, J. Gao, N. Rega, G. Zheng, W. Liang, M. Hada, M. Ehara, K. Toyota, R. Fukuda, J. Hasegawa, M. Ishida, T. Nakajima, Y. Honda, O. Kitao, H. Nakai, T. Vreven, K. Throssell, J. A. Montgomery, Jr., J. E. Peralta, F. Ogliaro, M. Bearpark, J. J. Heyd, E. Brothers, K. N. Kudin, V. N. Staroverov, T. Keith, R. Kobayashi, J. Normand, K. Raghavachari, A. Rendell, J. C. Burant, S. S. Iyengar, J. Tomasi, M. Cossi, J. M. Millam, M. Klene, C. Adamo, R. Cammi, J. W. Ochterski, R. L. Martin, K. Morokuma, O. Farkas, J. B. Foresman, and D. J. Fox, Gaussian, Inc., Wallingford CT, 2016.
- [S10] Lu, T.; Chen, F. *J. Comput. Chem.* **2012**, 33 (5), 580–592.
